# Supplementary material for: Kinetic resolution via supramolecular iminium catalysis: multiactivation enables the asymmetric synthesis of β-aryl substituted aldehydes and densely functionalized cyclohexanes
Source: Royal Society of Chemistry journal article supplement (doi:10.1039/c7cc01625e), 2017-01-01
Supplement: c7cc01625e1.pdf [file c7cc01625e1.pdf]

## Supporting Information

Kinetic Resolution *via* Supramolecular Iminium Catalysis: Multiactivation Enables the Asymmetric Synthesis of  $\beta$ -Aryl Substituted Aldehydes and Densely Functionalized Cyclohexanes

Zhi-Long Jia,<sup>a</sup> Yao Wang,<sup>\*b</sup> Guo-Qiang Xu,<sup>a</sup> and Peng-Fei Xu<sup>\*a</sup>

---

<sup>a</sup> State Key Laboratory of Applied Organic Chemistry, College of Chemistry and Chemical Engineering, Lanzhou University, Lanzhou 730000 (P.R. China).

<sup>b</sup> School of Chemistry and Chemical Engineering, Shandong University, Jinan, 250100 (China)

### Table of Contents

|                                                     |     |
|-----------------------------------------------------|-----|
| 1. General Information.....                         | S2  |
| 2. Preparation of Substrates .....                  | S3  |
| 3. General Procedure.....                           | S6  |
| 4. Analytical and Spectral Data .....               | S6  |
| 5. X-ray Crystallography of Product <b>6d</b> ..... | S24 |
| NMR Spectra .....                                   | S25 |
| HPLC Spectra .....                                  | S58 |

## 1. General Information

Chemicals were either purchased from commercial suppliers or purified by standard techniques. Ultra dry 1,2-dichloroethane(DCE) was purchased from commercial suppliers. Toluene, dichloromethane (DCM), tetrahydrofuran (THF), and acetonitrile were dried through alumina using a Pure-Solv PS-MD-5 Solvent Purification System (Innovative Technology). Analytical thin-layer chromatography (TLC) was performed on silica gel plates with F-254 indicator and compounds were visualized by irradiation with UV light. Flash chromatography was carried out utilizing silica gel 200-300 mesh.  $^1\text{H}$  NMR,  $^{13}\text{C}$  NMR spectra were recorded on a Bruker AM-400 spectrometer (400 MHz  $^1\text{H}$ , 101 MHz  $^{13}\text{C}$ ). The spectra were recorded in  $\text{CDCl}_3$  or  $\text{DMSO-d}_6$  as solvents at room temperature,  $^1\text{H}$  and  $^{13}\text{C}$  NMR chemical shifts are reported in ppm relative to either the residual solvent peak ( $^{13}\text{C}$ ) ( $\delta = 77.00$  ppm) or TMS ( $^1\text{H}$ ) ( $\delta = 0$  ppm) as an internal standard. Data for  $^1\text{H}$  NMR are reported as follows: chemical shift ( $\delta$  ppm), multiplicity (s = singlet, d = doublet, t = triplet, m = multiplet, dd = double doublet), coupling constant (Hz) and integration. Data for  $^{13}\text{C}$  NMR are reported as chemical shift. IR spectra were recorded using Nicolet NEXUS 670 FT-IR instrument and are reported in wavenumbers ( $\text{cm}^{-1}$ ). HRMS were performed on Bruker Apex II mass instrument (ESI). Enantiomeric excess values were determined by HPLC with employing a Daicel Chirapak AD-H, AS-H, OD-H. on Agilent 1100 series and eluting with *i*-PrOH and *n*-hexane. Optical rotation was measured on the Perkin Elmer 341 polarimeter with  $[\alpha]_D$  values reported in degrees; concentration (c) is in g/100 mL.

## 2. Preparation of Substrates

Substrates **1** were prepared following the published procedures.

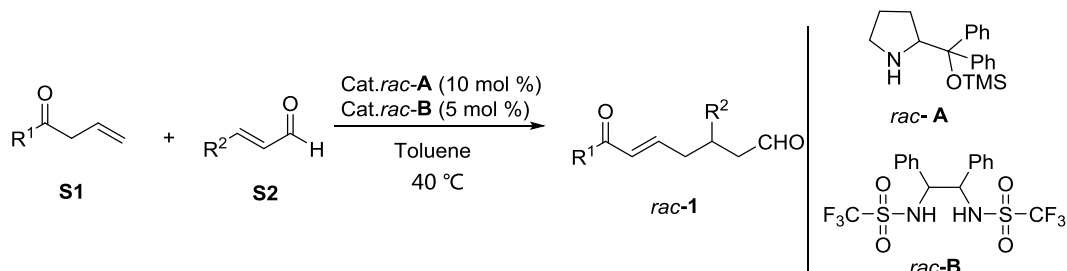

To a solution of catalysts **rac-A** (10 mol %) and **rac-B** (5 mol %) in dry toluene or DCE was added unsaturated aldehyde **S2** (1 equiv) at room temperature. Then the reaction mixture was heated to 40 °C and Allyl Ketones **S1** (1.2 equiv) was added subsequently. The reaction mixture was stirred at 50 °C and monitored by TLC. Upon complete consumption of aldehyde **S2**, the reaction mixture was then immediately purified by flash chromatography on silica gel to give the desired products **1a-m**.

### (E)-7-(4-chlorophenyl)-7-oxo-3-phenylhept-5-enal (**1b**)

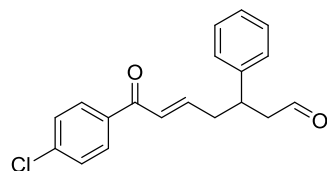

Faint yellow oil.  $^1\text{H NMR}$  (400 MHz,  $\text{CDCl}_3$ )  $\delta$  9.68 (s, 1H), 7.78 - 7.61 (m, 2H), 7.44 - 7.09 (m, 7H), 6.96 - 6.77 (m, 1H), 6.71 (d,  $J = 15.6$  Hz, 1H), 3.54 - 3.29 (m, 1H), 2.89 - 2.74 (m, 2H), 2.74 - 2.50 (m, 2H).  $^{13}\text{C NMR}$  (101 MHz,  $\text{CDCl}_3$ )  $\delta$  200.6, 189.0, 146.2, 142.3, 139.0, 135.8, 129.8, 128.7, 128.6, 127.6, 127.3, 126.9, 49.4, 39.3, 39.0. HRMS (ESI): exact mass calculated for  $[\text{M}+\text{H}]^+$  ( $\text{C}_{19}\text{H}_{18}\text{ClO}_2$ ) requires  $m/z$  313.0990, found  $m/z$  313.0994.

### (E)-7-(4-bromophenyl)-7-oxo-3-phenylhept-5-enal (**1d**)

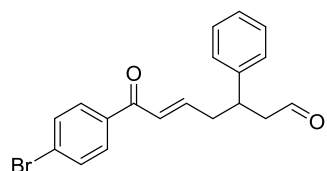

Faint yellow oil.  $^1\text{H NMR}$  (400 MHz,  $\text{CDCl}_3$ )  $\delta$  9.68 (t,  $J = 1.2$  Hz, 1H), 7.62 (d,  $J = 8.4$  Hz, 2H), 7.54 (d,  $J = 8.8$  Hz, 2H), 7.32 (t,  $J = 7.2$  Hz, 2H), 7.25 - 7.15 (m, 3H), 6.93 - 6.76 (m, 1H), 6.70 (d,  $J = 15.2$  Hz, 1H), 3.51 - 3.38 (m, 1H), 2.88 - 2.75 (m, 2H), 2.74 - 2.54 (m, 2H).  $^{13}\text{C NMR}$  (101 MHz,  $\text{CDCl}_3$ )  $\delta$  200.6, 189.3, 146.3, 142.3, 136.2,

131.7, 129.9, 128.8, 127.7, 127.6, 127.3, 127.0, 49.5, 39.3, 39.0. HRMS (ESI): exact mass calculated for  $[M+H]^+$  ( $C_{19}H_{18}BrO_2$ ) requires  $m/z$  357.0485, found  $m/z$  357.0484.

**(E)-7-(2-fluorophenyl)-7-oxo-3-phenylhept-5-enal (1f)**

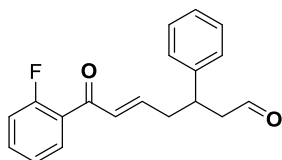

Faint yellow oil.  $^1H$  NMR (400 MHz,  $CDCl_3$ )  $\delta$  9.68 (s, 1H), 7.62 (t,  $J = 7.6$  Hz, 1H), 7.47 (dd,  $J = 13.2, 6.4$  Hz, 1H), 7.31 (t,  $J = 7.6$  Hz, 2H), 7.25 - 7.15 (m, 4H), 7.14 - 7.04 (m, 1H), 6.86 - 6.72 (m, 1H), 6.66 (d,  $J = 15.6$  Hz, 1H), 3.44 (p,  $J = 7.2$  Hz, 1H), 2.81 (d,  $J = 7.2$  Hz, 2H), 2.64 (t,  $J = 7.2$  Hz, 2H).  $^{13}C$  NMR (101 MHz,  $CDCl_3$ )  $\delta$  200.8, 189.1 (d,  $J = 2$  Hz), 161.0 (d,  $J = 251$  Hz), 146.3, 142.4, 133.8 (d,  $J = 8$  Hz), 131.5 (d,  $J = 6$  Hz), 130. (d,  $J = 2$  Hz), 128.8, 127.3, 127.0, 126.6 (d,  $J = 14$  Hz), 124.3 (d,  $J = 3$  Hz), 116.4 (d,  $J = 22$  Hz), 49.4, 39.4, 39.0. HRMS (ESI): exact mass calculated for  $[M+H]^+$  ( $C_{19}H_{18}FO_2$ ) requires  $m/z$  297.1285, found  $m/z$  297.1289.

**(E)-7-(4-fluorophenyl)-7-oxo-3-phenylhept-5-enal (1i)**

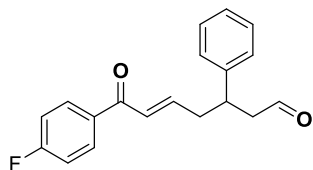

Faint yellow oil.  $^1H$  NMR (400 MHz,  $CDCl_3$ )  $\delta$  9.70 (t,  $J = 1.2$  Hz, 1H), 7.86 - 7.75 (m, 2H), 7.33 (t,  $J = 7.6$  Hz, 2H), 7.28 - 7.18 (m, 3H), 7.09 (t,  $J = 8.4$  Hz, 2H), 6.91 - 6.78 (m, 1H), 6.73 (d,  $J = 15.2$  Hz, 1H), 3.53 - 3.38 (m, 1H), 2.83 (d,  $J = 7.2$  Hz, 2H), 2.75 - 2.58 (m, 2H).  $^{13}C$  NMR (101 MHz,  $CDCl_3$ )  $\delta$  200.7, 188.8, 165.5 (d,  $J = 253$  Hz), 145.9, 142.3, 133 (d,  $J = 3$  Hz), 131.1 (d,  $J = 9$  Hz), 128.8, 127.8, 127.4, 127.0, 115.5 (d,  $J = 21$  Hz), 49.6, 39.4, 39.1. HRMS (ESI): exact mass calculated for  $[M+H]^+$  ( $C_{19}H_{18}FO_2$ ) requires  $m/z$  297.1285, found  $m/z$  297.1289.

**(E)-7-oxo-7-phenyl-3-(p-tolyl)hept-5-enal (1j)**

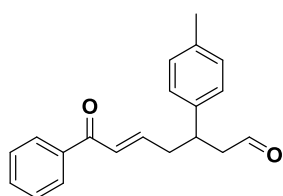

Faint yellow oil.  $^1H$  NMR (400 MHz,  $CDCl_3$ )  $\delta$  9.69 (s, 1H), 7.79 (d,  $J = 7.2$  Hz, 2H), 7.54 (t,  $J = 7.2$  Hz, 1H), 7.43 (t,  $J = 7.6$  Hz, 2H), 7.12 (m, 5 H), 6.82 (m, 2H), 3.47 - 3.36 (m, 1H), 2.82 - 2.77 (m, 1H), 2.65 (dd,  $J = 13.2, 6.6$  Hz, 1H), 2.34 - 2.25 (m, 5H).  $^{13}C$  NMR (101 MHz,  $CDCl_3$ )  $\delta$  201.0, 190.5, 145.9, 139.3, 137.7, 136.7, 132.7, 129.5, 128.5, 128.5, 128.2, 127.3, 49.6, 39.6, 38.9,

21.0. HRMS (ESI): exact mass calculated for  $[M+H]^+$  ( $C_{20}H_{21}O_2$ ) requires  $m/z$  293.1536, found  $m/z$  293.1532.

**(E)-3-(4-methoxyphenyl)-7-oxo-7-phenylhept-5-enal (1k)**

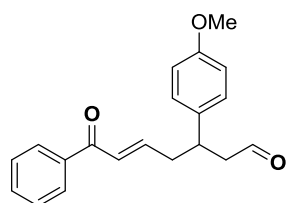

Faint yellow oil.  $^1H$  NMR (400 MHz,  $CDCl_3$ )  $\delta$  9.67 (s, 1H), 7.85 – 7.74 (m, 2H), 7.53 (t,  $J = 7.6$  Hz, 1H), 7.42 (t,  $J = 7.6$  Hz, 2H), 7.13 (d,  $J = 8.8$  Hz, 2H), 6.91 – 6.69 (m, 4H), 3.77 (s, 3H), 3.48 – 3.33 (m, 1H), 2.78 (dd,  $J = 7.2, 1.6$  Hz, 2H), 2.71 – 2.52 (m, 2H).  $^{13}C$  NMR (101 MHz,  $CDCl_3$ )  $\delta$  201.0, 190.4, 158.4, 145.9, 137.6, 134.3, 132.6, 128.4, 128.4, 128.3, 128.0, 114.1, 55.1, 49.6, 39.6, 38.4. HRMS (ESI): exact mass calculated for  $[M+H]^+$  ( $C_{20}H_{21}O_3$ ) requires  $m/z$  309.1485, found  $m/z$  309.1490.

**(E)-3-(4-bromophenyl)-7-oxo-7-phenylhept-5-enal (1l)**

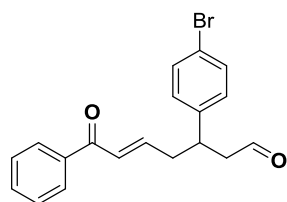

Faint yellow oil.  $^1H$  NMR (400 MHz,  $CDCl_3$ )  $\delta$  9.67 (s, 1H), 7.86 – 7.72 (m, 2H), 7.54 (t,  $J = 7.4$  Hz, 1H), 7.43 (dd,  $J = 7.8, 5.8$  Hz, 4H), 7.09 (d,  $J = 8.4$  Hz, 2H), 6.88 – 6.71 (m, 2H), 3.46 – 3.39 (m, 1H), 2.81 – 2.79 (m, 2H), 2.72 – 2.55 (m, 2H).  $^{13}C$  NMR (101 MHz,  $CDCl_3$ )  $\delta$  200.1, 190.2, 145.0, 141.5, 137.4, 132.7, 131.8, 129.1, 128.5, 128.4, 128.2, 120.7, 49.3, 39.1, 38.4. HRMS (ESI): exact mass calculated for  $[M+H]^+$  ( $C_{19}H_{18}BrO_2$ ) requires  $m/z$  357.0485, found  $m/z$  357.0484.

**(E)-7-oxo-7-phenyl-3-(m-tolyl)hept-5-enal (1m)**

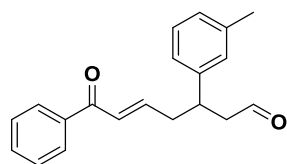

Faint yellow oil.  $^1H$  NMR (400 MHz,  $CDCl_3$ )  $\delta$  9.69 (s, 1H), 7.79 (d,  $J = 7.2$  Hz, 2H), 7.53 (t,  $J = 7.2$  Hz, 1H), 7.43 (t,  $J = 7.6$  Hz, 2H), 7.21 (t,  $J = 7.2$  Hz, 1H), 7.05 – 7.00 (m, 3H), 6.91 – 6.69 (m, 2H), 3.41 (p,  $J = 7.2$  Hz, 1H), 2.80 (d,  $J = 7.2$  Hz, 2H), 2.70 – 2.57 (m, 2H), 2.33 (s, 3H).  $^{13}C$  NMR (101 MHz,  $CDCl_3$ )  $\delta$  201.0, 190.6, 145.9, 142.3, 138.4, 137.6, 132.7, 128.7, 128.50, 128.4, 128.2, 127.8, 124.3, 49.5, 39.5, 39.1, 21.4. HRMS (ESI): exact mass calculated for  $[M+H]^+$  ( $C_{20}H_{21}O_2$ ) requires  $m/z$  293.1536, found  $m/z$  293.1541.

### 3. General procedure

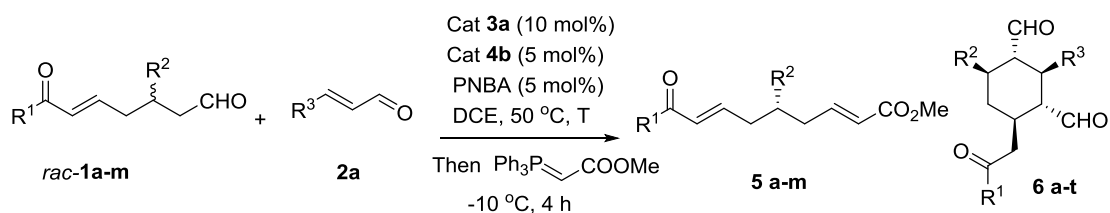

Materials were purified by chromatography before use. To a flame dried reaction vial with a magnetic stirring bar was added catalyst **3 a** (0.02 mmol, 10 mol%) and catalyst **4 b** (0.01 mmol, 5 mol%) and 4-nitrobenzoic acid (0.01 mmol, 5 mol%). Under the protection of nitrogen, a solution of substrate **1** in ultra dry DCE (0.2 mol/L, 1.0 mL) and cinnamaldehyde (0.2 mmol) was added by syringe respectively. Then the reaction mixture was stirred at 50 °C for the specified time and monitored by TLC. Since the two products are difficult to separate, after the reaction was completed, the reaction mixture was cooled to -10 °C, then  $\text{Ph}_3\text{PCHCOOMe}$  (0.15 mmol) was added and the reaction was monitored by TLC. After reacting for 4 h, the mixture was warmed to room temperature for another hour and then purified by chromatography to give the desired products.

### 4. Analytical and spectra data

#### methyl (S,2E,7E)-9-oxo-5,9-diphenylnona-2,7-dienoate (**5a**)

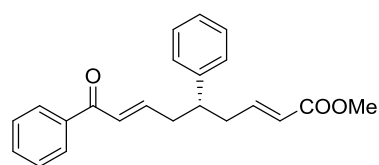

Colorless oil;  $[\alpha]_{\text{D}}^{20} = -3$  (c 1.0,  $\text{CH}_2\text{Cl}_2$ , 95% ee); IR(KBr  $\text{cm}^{-1}$ ): 3194, 3061, 3029, 2950, 2927, 1721, 1669, 1620, 1598, 1449, 1437, 1278, 1209, 982, 763;  $^1\text{H}$  NMR (400 MHz,  $\text{CDCl}_3$ )  $\delta$  7.78 (d,  $J = 7.2$  Hz, 2H), 7.53 (t,  $J = 7.6$  Hz, 1H), 7.32 (t,  $J = 7.2$  Hz, 2H), 7.23 (t,  $J = 6.4$  Hz, 1H), 7.17 (d,  $J = 7.2$  Hz, 2H), 6.90 – 6.71 (m, 3H), 5.80 (d,  $J = 15.6$  Hz, 1H), 3.69 (s, 3H), 3.04 – 2.91 (m, 1H), 2.74 – 2.52 (m, 4H).  $^{13}\text{C}$  NMR (101 MHz,  $\text{CDCl}_3$ )  $\delta$  190.5, 166.6, 146.5, 146.4, 142.6, 137.6, 132.6, 128.7, 128.4, 128.4, 127.9, 127.4, 126.8, 122.8, 51.4, 44.3, 39.2, 38.7. The enantiomeric excess was determined by HPLC with AS-H column. (*n*-hexane:*i*-PrOH = 80:20), 1mL/min; major enantiomer  $t_{\text{R}} = 11.81$  min, minor

enantiomer  $t_R = 13.18$  min. HRMS (ESI) :  $[M+H]^+$  calcd for  $[C_{22}H_{23}O_3]$ : 335.1642, found: 335.1643.

**methyl (2E,7E)-9-(4-chlorophenyl)-9-oxo-5-phenylnona-2,7-dienoate (5b)**

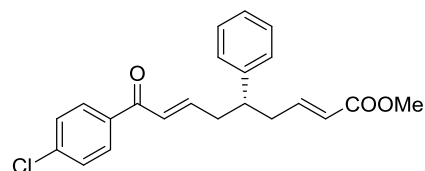

Colorless oil;  $[\alpha]_D^{20} = +3$  ( $c$  1.0,  $CH_2Cl_2$ , 89% ee);

IR(KBr  $cm^{-1}$ ): 3058, 3028, 2950, 2926, 2850, 1721, 1670, 1621, 1597, 1492, 1448, 1436, 1277, 1211, 1092,

1014, 982;  $^1H$  NMR (400 MHz,  $CDCl_3$ )  $\delta$  7.75 – 7.64 (m, 2H), 7.46 – 7.34 (m, 2H), 7.31 (t,  $J = 7.4$  Hz, 2H), 7.23 (t,  $J = 7.6$  Hz, 1H), 7.19 – 7.12 (m, 2H), 6.90 – 6.78 (m, 2H), 6.69 (d,  $J = 15.6$  Hz, 1H), 5.80 (d,  $J = 15.6$  Hz, 1H), 3.68 (s, 3H), 2.97 (p,  $J = 7.2$  Hz, 1H), 2.76 – 2.50 (m, 4H).  $^{13}C$  NMR (101 MHz,  $CDCl_3$ )  $\delta$  189.2, 166.5, 146.8, 146.3, 142.5, 139.0, 135.9, 129.9, 128.7, 127.5, 127.4, 126.9, 122.8, 51.4, 44.3, 39.1, 38.7. The enantiomeric excess was determined by HPLC with AS-H column. ( $n$ -hexane: $i$ -PrOH = 80:20), 1mL/min; major enantiomer  $t_R = 16.61$  min, minor enantiomer  $t_R = 20.32$  min. HRMS (ESI) :  $[M+H]^+$  calcd for  $[C_{22}H_{22}ClO_3]$ : 369.1252, found: 369.1248.

**methyl (S,2E,7E)-9-oxo-5-phenyl-9-(*m*-tolyl)nona-2,7-dienoate (5c)**

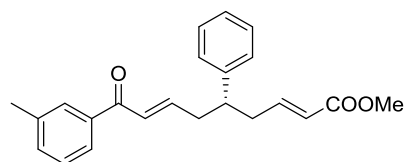

Colorless oil;  $[\alpha]_D^{20} = +5$  ( $c$  1.0,  $CH_2Cl_2$ , 96% ee);

IR(KBr  $cm^{-1}$ ): 3060, 3028, 2951, 2926, 2854, 1721, 1671, 1620, 1585, 1453, 1436, 1398, 1267, 1212, 1070, 1009;

$^1H$  NMR (400 MHz,  $CDCl_3$ )  $\delta$  7.62 – 7.53 (m, 2H), 7.37 – 7.27 (m, 4H), 7.25 – 7.20 (m, 1H), 7.20 – 7.15 (m, 2H), 6.90 – 6.79 (m, 2H), 6.75 (d,  $J = 15.6$  Hz, 1H), 5.80 (d,  $J = 15.6$  Hz, 1H), 3.69 (s, 3H), 3.02 – 2.92 (m, 1H), 2.72 – 2.55 (m, 4H), 2.38 (s, 3H).  $^{13}C$  NMR (101 MHz,  $CDCl_3$ )  $\delta$  190.8, 166.6, 146.5, 146.1, 142.6, 138.2, 137.7, 133.4, 129.0, 128.7, 128.3, 128.1, 127.4, 126.8, 125.7, 122.8, 51.4, 44.3, 39.2, 38.7, 21.3. The enantiomeric excess was determined by HPLC with AS-H column. ( $n$ -hexane: $i$ -PrOH = 80:20), 1mL/min; major enantiomer  $t_R = 12.81$  min, minor enantiomer  $t_R = 14.79$  min. HRMS (ESI) :  $[M+H]^+$  calcd for  $[C_{23}H_{25}O_3]$ : 349.1798, found: 349.1797.

**methyl (S,2E,7E)-9-(4-bromophenyl)-9-oxo-5-phenylnona-2,7-dienoate (5d)**

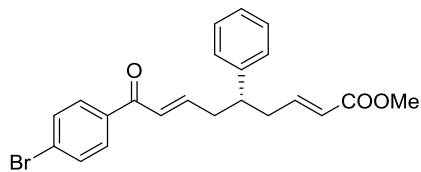

Colorless oil;  $[\alpha]_D^{20} = +7$  ( $c$  1.0,  $\text{CH}_2\text{Cl}_2$ , 95% ee);

IR(KBr  $\text{cm}^{-1}$ ): 3028, 2951, 2924, 2857, 1722, 1670,

1621, 1452, 1436, 1278, 1204, 1165, 1032, 982;  $^1\text{H}$

NMR (400 MHz,  $\text{CDCl}_3$ )  $\delta$  7.61 (d,  $J = 8.8$  Hz, 2H),

7.53 (d,  $J = 8.4$  Hz, 2H), 7.31 (t,  $J = 7.6$  Hz, 2H), 7.22 (t,  $J = 7.6$  Hz, 1H), 7.16 (d,  $J = 7.6$  Hz,

2H), 6.90 - 6.78 (m, 2H), 6.68 (d,  $J = 15.6$  Hz, 1H), 5.80 (d,  $J = 15.6$  Hz, 1H), 3.67 (s, 3H),

3.04 - 2.86 (m, 1H), 2.79 - 2.49 (m, 4H).  $^{13}\text{C}$  NMR (101 MHz,  $\text{CDCl}_3$ )  $\delta$  189.3, 166.4, 146.8,

146.2, 142.4, 136.3, 131.6, 129.9, 128.6, 127.6, 127.4, 127.3, 126.8, 122.8, 51.3, 44.2, 39.0,

38.7. The enantiomeric excess was determined by HPLC with AS-H column.

( $n$ -hexane: $i$ -PrOH = 80:20), 1mL/min; major enantiomer  $t_R = 15.45$  min, minor enantiomer  $t_R$

= 17.24 min. HRMS (ESI) :  $[\text{M}+\text{H}]^+$  calcd for  $[\text{C}_{22}\text{H}_{22}\text{BrO}_3]$ : 412.0747, found: 413.0744.

**methyl (S,2E,7E)-9-oxo-5-phenyl-9-(p-tolyl)nona-2,7-dienoate (5e)**

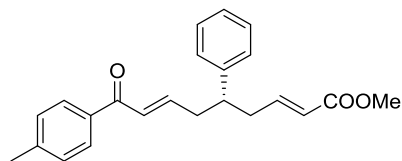

Colorless oil;  $[\alpha]_D^{20} = +6$  ( $c$  1.0,  $\text{CH}_2\text{Cl}_2$ , 91% ee);

IR(KBr  $\text{cm}^{-1}$ ): 3061, 3027, 2950, 2926, 2851, 1722, 1654,

1620, 1453, 1436, 1272, 1210, 1155, 1038, 982;  $^1\text{H}$  NMR

(400 MHz,  $\text{CDCl}_3$ )  $\delta$  7.70 (d,  $J = 8.0$  Hz, 2H), 7.30 (t,  $J = 7.2$

Hz, 2H), 7.25 - 7.10 (m, 5H), 6.93 - 6.68 (m, 3H), 5.79 (d,  $J = 15.6$  Hz, 1H), 3.67 (s, 3H), 3.05 - 2.85

(m, 1H), 2.73 - 2.50 (m, 4H), 2.38 (s, 3H).  $^{13}\text{C}$  NMR (101 MHz,  $\text{CDCl}_3$ )  $\delta$  189.9, 166.5, 146.4, 145.7,

143.4, 142.6, 135.0, 129.1, 128.6, 128.5, 127.8, 127.3, 126.7, 122.7, 51.3, 44.3, 39.1, 38.6, 21.5. The

enantiomeric excess was determined by HPLC with AS-H column. ( $n$ -hexane: $i$ -PrOH =

80:20), 1mL/min; major enantiomer  $t_R = 12.76$  min, minor enantiomer  $t_R = 16.28$  min. HRMS

(ESI) :  $[\text{M}+\text{H}]^+$  calcd for  $[\text{C}_{23}\text{H}_{25}\text{O}_3]$ : 349.1798, found: 349.1797.

**methyl (S,2E,7E)-9-(2-fluorophenyl)-9-oxo-5-phenylnona-2,7-dienoate (5f)**

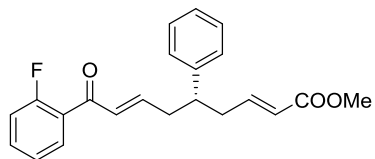

Colorless oil;  $[\alpha]_D^{20} = +0$  ( $c$  1.0,  $\text{CH}_2\text{Cl}_2$ , 88% ee);

IR(KBr  $\text{cm}^{-1}$ ): 3029, 2950, 2926, 1721, 1657, 1618, 1481,

1452, 1275, 1210, 1155, 1103, 1028, 981;  $^1\text{H}$  NMR (400



MHz, CDCl<sub>3</sub>)  $\delta$  7.61 (td,  $J = 7.6, 1.6$  Hz, 1H), 7.46 (ddd,  $J = 15.2, 5.2, 1.6$  Hz, 1H), 7.30 (t,  $J = 7.6$  Hz, 2H), 7.24 - 7.13 (m, 4H), 7.09 (dd,  $J = 10.0, 8.8$  Hz, 1H), 6.90 - 6.71 (m, 2H), 6.70 - 6.60 (m, 1H), 5.79 (d,  $J = 15.6$  Hz, 1H), 3.68 (s, 3H), 3.02 - 2.90 (m, 1H), 2.70 - 2.51 (m, 4H). <sup>13</sup>C NMR (101 MHz, CDCl<sub>3</sub>)  $\delta$  189.1 (d,  $J = 2$  Hz), 166.6, 160.9 (d,  $J = 252$  Hz), 147.0, 146.4, 142.5, 133.7 (d,  $J = 8$  Hz), 131.2 (d,  $J = 5$  Hz), 130.8 (d,  $J = 3$  Hz), 128.6, 127.3, 126.8, 126.7 (d,  $J = 13$  Hz), 124.3 (d,  $J = 6$  Hz), 122.8, 116.3 (d,  $J = 23$  Hz), 51.4, 44.2, 39.1, 38.5. The enantiomeric excess was determined by HPLC with AS-H column. (*n*-hexane:*i*-PrOH = 80:20), 1mL/min; major enantiomer  $t_R = 11.94$  min, minor enantiomer  $t_R = 14.33$  min. HRMS (ESI) : [M+NH<sub>4</sub>]<sup>+</sup> calcd for [C<sub>22</sub>H<sub>25</sub>FNO<sub>3</sub>]: 370.1813, found: 370.1814.

**methyl (S,2E,7E)-9-(3-chlorophenyl)-9-oxo-5-phenylnona-2,7-dienoate (5g)**

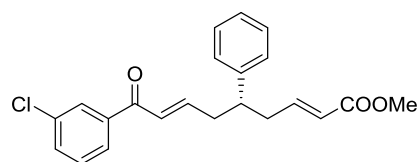

Colorless oil;  $[\alpha]_D^{20} = +1$  ( $c$  1.0, CH<sub>2</sub>Cl<sub>2</sub>, 89% ee);

IR(KBr cm<sup>-1</sup>): 3066, 2925, 2854, 1720, 1656, 1620,

1451, 1438, 1382, 1278, 1226, 1198, 1148, 1097, 1030,

982; <sup>1</sup>H NMR (400 MHz, CDCl<sub>3</sub>)  $\delta$  7.72 (s, 1H), 7.62 (d,

$J = 7.6$  Hz, 1H), 7.49 (dd,  $J = 8.0, 1.2$  Hz, 1H), 7.39 - 7.29 (m, 3H), 7.23 (t,  $J = 7.6$  Hz, 1H),

7.17 (d,  $J = 6.8$  Hz, 2H), 6.91 - 6.76 (m, 2H), 6.67 (d,  $J = 15.6$  Hz, 1H), 5.81 (d,  $J = 15.6$  Hz,

1H), 3.69 (s, 3H), 2.97 (p,  $J = 7.2$  Hz 1H), 2.76 - 2.54 (m, 4H). <sup>13</sup>C NMR (101 MHz, CDCl<sub>3</sub>)

$\delta$  189.3, 166.6, 147.3, 146.3, 142.5, 139.3, 134.7, 132.6, 129.8, 128.8, 128.6, 127.6, 127.4,

127.0, 126.5, 122.9, 51.4, 44.3, 39.2, 38.8. The enantiomeric excess was determined by HPLC

with AS-H column. (*n*-hexane:*i*-PrOH = 80:20), 1mL/min; major enantiomer  $t_R = 15.47$  min,

minor enantiomer  $t_R = 17.03$  min. HRMS (ESI) : [M+H]<sup>+</sup> calcd for [C<sub>22</sub>H<sub>22</sub>ClO<sub>3</sub>]: 369.1252,

found: 369.1248.

**methyl (S,2E,7E)-9-(4-methoxyphenyl)-9-oxo-5-phenylnona-2,7-dienoate (5h)**

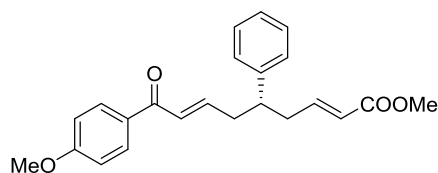

Colorless oil;  $[\alpha]_D^{20} = +4$  ( $c$  1.0, CH<sub>2</sub>Cl<sub>2</sub>, 95% ee);

IR(KBr cm<sup>-1</sup>): 3058, 2969, 2933, 1720, 1664, 1619,

1600, 1511, 1437, 1340, 1306, 1264, 1172, 1028, 982;

<sup>1</sup>H NMR (400 MHz, CDCl<sub>3</sub>)  $\delta$  7.80 (d,  $J = 8.8$  Hz, 2H),

7.33 - 7.27 (m, 2H), 7.26 - 7.13 (m, 3H), 6.90 - 6.74 (m, 5H), 5.80 (d,  $J = 15.6$  Hz, 1H), 3.85 (s, 3H), 3.68 (s, 3H), 3.03 - 2.90 (m, 1H), 2.72 - 2.50 (m, 4H).  $^{13}\text{C}$  NMR (100 MHz,  $\text{CDCl}_3$ )  $\delta$  188.7, 166.6, 163.3, 146.5, 145.2, 142.7, 130.7, 130.5, 128.6, 127.6, 127.4, 126.8, 122.7, 113.6, 55.4, 51.4, 44.3, 39.1, 38.6. The enantiomeric excess was determined by HPLC with AS-H column. (*n*-hexane:*i*-PrOH = 80:20), 1mL/min; major enantiomer  $t_{\text{R}} = 21.65$  min, minor enantiomer  $t_{\text{R}} = 26.47$  min. HRMS (ESI) :  $[\text{M}+\text{H}]^+$  calcd for  $[\text{C}_{23}\text{H}_{25}\text{O}_4]$ : 365.1747, found: 365.1750.

**methyl (S,2E,7E)-9-(4-fluorophenyl)-9-oxo-5-phenylnona-2,7-dienoate (5i)**

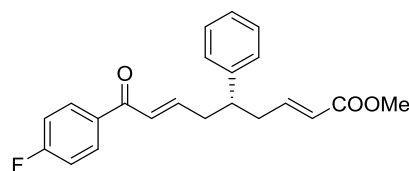

Colorless oil;  $[\alpha]_{\text{D}}^{20} = +4$  ( $c$  1.0,  $\text{CH}_2\text{Cl}_2$ , 96% ee);  
 IR(KBr  $\text{cm}^{-1}$ ): 3062, 3028, 2950, 2928, 1721, 1671, 1657,  
 1621, 1598, 1507, 1436, 1338, 1277, 1229, 1156, 1031,  
 982;  $^1\text{H}$  NMR (400 MHz,  $\text{CDCl}_3$ )  $\delta$  7.79 (dd,  $J = 8.0, 5.6$

Hz, 2H), 7.32 (t,  $J = 7.2$  Hz, 2H), 7.27 - 7.13 (m, 3H), 7.08 (t,  $J = 8.4$  Hz, 2H), 6.95 - 6.76 (m, 2H), 6.72 (d,  $J = 15.6$  Hz, 1H), 5.80 (d,  $J = 15.6$  Hz, 1H), 3.68 (s, 3H), 3.05 - 2.85 (m, 1H), 2.78 - 2.45 (m, 4H).  $^{13}\text{C}$  NMR (101 MHz,  $\text{CDCl}_3$ )  $\delta$  188.8, 166.7, 165.4 (d,  $J = 253$  Hz), 146.4 (d,  $J = 14$  Hz), 142.5, 133.9 (d,  $J = 3$  Hz), 131.1, 131.0, 128.7, 127.5, 127.4, 126.8, 122.8, 115.5 (d,  $J = 21$  Hz), 51.4, 44.3, 39.1, 38.7. The enantiomeric excess was determined by HPLC with AS-H column. (*n*-hexane:*i*-PrOH = 80:20), 1mL/min; major enantiomer  $t_{\text{R}} = 14.87$  min, minor enantiomer  $t_{\text{R}} = 16.79$  min. HRMS (ESI) :  $[\text{M}+\text{H}]^+$  calcd for  $[\text{C}_{22}\text{H}_{22}\text{FO}_3]$ : 353.1547, found: 353.1546.

**methyl (S,2E,7E)-9-oxo-9-phenyl-5-(p-tolyl)nona-2,7-dienoate (5j)**

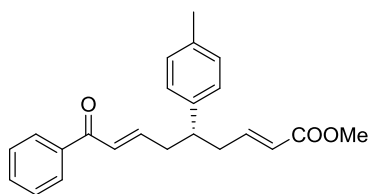

Colorless oil;  $[\alpha]_{\text{D}}^{20} = -1$  ( $c$  1.0,  $\text{CH}_2\text{Cl}_2$ , 98% ee);  
 IR(KBr  $\text{cm}^{-1}$ ): 2950, 2924, 2856, 1722, 1670, 1621, 1598,  
 1447, 1437, 1276, 1209, 1178, 1157, 1037, 1020, 981;  $^1\text{H}$   
 NMR (400 MHz,  $\text{CDCl}_3$ )  $\delta$  7.81 - 7.75 (m, 2H), 7.57 -

7.50 (m, 1H), 7.42 (t,  $J = 7.6$  Hz, 2H), 7.15 - 7.09 (m, 2H), 7.09 - 7.01 (m, 1H), 6.90 - 6.70 (m, 3H), 5.80 (d,  $J = 15.6$  Hz, 1H), 3.69 (s, 3H), 2.99 - 2.89 (m, 1H), 2.70 - 2.54 (m, 4H), 2.32 (s,

3H).  $^{13}\text{C}$  NMR (101 MHz,  $\text{CDCl}_3$ )  $\delta$  190.7, 166.7, 146.7, 146.6, 139.6, 137.7, 136.4, 132.6, 129.4, 128.5, 128.4, 127.9, 127.3, 122.8, 51.4, 44.0, 39.3, 38.8, 21.0. The enantiomeric excess was determined by HPLC with AS-H column. (*n*-hexane:*i*-PrOH = 80:20), 1mL/min; major enantiomer  $t_{\text{R}}$  = 14.31 min, minor enantiomer  $t_{\text{R}}$  = 15.74 min. HRMS (ESI) :  $[\text{M}+\text{H}]^+$  calcd for  $[\text{C}_{23}\text{H}_{25}\text{O}_3]$ : 349.1798, found: 349.1799.

**methyl (S,2E,7E)-5-(4-methoxyphenyl)-9-oxo-9-phenylnona-2,7-dienoate (5k)**

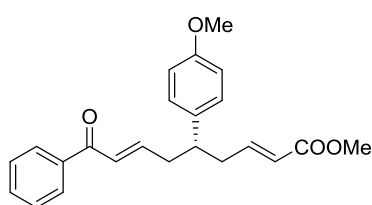

Colorless oil;  $[\alpha]_{\text{D}}^{20}$  = +8 (*c* 1.0,  $\text{CH}_2\text{Cl}_2$ , 96% ee); IR(KBr  $\text{cm}^{-1}$ ): 3057, 3029, 3000, 2950, 2931, 1721, 1657, 1618, 1513, 1446, 1437, 1275, 1249, 1179, 1036, 981;  $^1\text{H}$  NMR (400 MHz,  $\text{CDCl}_3$ )  $\delta$  7.84 - 7.72 (m, 2H), 7.56 - 7.49 (m, 1H), 7.41 (t,  $J$  = 7.6 Hz, 2H), 7.08 (d,  $J$  = 8.4 Hz, 2H), 6.92 - 6.70 (m, 5H), 5.79 (d,  $J$  = 15.6 Hz, 1H), 3.77 (s, 3H), 3.68 (s, 3H), 3.01 - 2.86 (m, 1H), 2.73 - 2.45 (m, 4H).  $^{13}\text{C}$  NMR (101 MHz,  $\text{CDCl}_3$ )  $\delta$  190.5, 166.6, 158.3, 146.6, 146.5, 137.6, 134.6, 132.6, 128.4, 128.4, 128.3, 127.8, 122.7, 114.0, 55.1, 51.3, 43.5, 39.4, 38.9. The enantiomeric excess was determined by HPLC with AS-H column. (*n*-hexane:*i*-PrOH = 80:20), 1mL/min; major enantiomer  $t_{\text{R}}$  = 20.05 min, minor enantiomer  $t_{\text{R}}$  = 22.09 min. HRMS (ESI) :  $[\text{M}+\text{H}]^+$  calcd for  $[\text{C}_{23}\text{H}_{25}\text{O}_4]$ : 365.1747, found: 365.1748.

**methyl (S,2E,7E)-5-(4-bromophenyl)-9-oxo-9-phenylnona-2,7-dienoate (5l)**

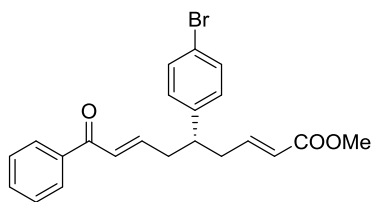

Colorless oil;  $[\alpha]_{\text{D}}^{20}$  = -6 (*c* 1.0,  $\text{CH}_2\text{Cl}_2$ , 89% ee); IR(KBr  $\text{cm}^{-1}$ ): 3423, 2950, 2927, 1721, 1669, 1621, 1488, 1448, 1437, 1277, 1228, 1209, 1074, 1010, 981;  $^1\text{H}$  NMR (400 MHz,  $\text{CDCl}_3$ )  $\delta$  7.78 (d,  $J$  = 7.2 Hz, 2H), 7.54 (t,  $J$  = 7.2 Hz, 1H), 7.46-7.42 (m, 4H), 7.05 (d,  $J$  = 8.4 Hz, 2H), 6.88 - 6.70 (m, 3H), 5.79 (d,  $J$  = 15.6 Hz, 1H), 3.69 (s, 3H), 3.01 - 2.89 (m, 1H), 2.71 - 2.49 (m, 4H).  $^{13}\text{C}$  NMR (101 MHz,  $\text{CDCl}_3$ )  $\delta$  190.4, 166.5, 145.8, 145.6, 141.6, 137.6, 132.8, 131.9, 129.2, 128.5, 128.5, 128.1, 123.2, 120.7, 51.5, 43.9, 39.1, 38.5. The enantiomeric excess was determined by HPLC with AS-H column. (*n*-hexane:*i*-PrOH = 80:20), 1mL/min; major enantiomer  $t_{\text{R}}$  = 28.91 min,

minor enantiomer  $t_R = 32.35$  min. HRMS (ESI) :  $[M+H]^+$  calcd for  $[C_{22}H_{22}BrO_3]$ : 413.0747, found: 413.0745.

**methyl (S,2E,7E)-9-oxo-9-phenyl-5-(m-tolyl)nona-2,7-dienoate (5m)**

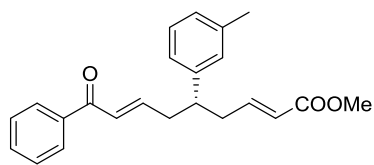

Colorless oil;  $[\alpha]_D^{20} = -4$  ( $c$  1.0,  $CH_2Cl_2$ , 93% ee); IR(KBr  $cm^{-1}$ ): 3425, 3056, 3024, 2949, 2924, 1721, 1670, 1620, 1447, 1436, 1277, 1210, 1178, 1037, 1020, 982;  $^1H$  NMR (400 MHz,  $CDCl_3$ )  $\delta$  7.83 - 7.73 (m, 2H), 7.57 - 7.49 (m, 1H), 7.42 (t,  $J = 7.6$  Hz, 2H), 7.20 (t,  $J = 8.0$  Hz, 1H), 7.04 (d,  $J = 7.2$  Hz, 1H), 6.98 - 6.96 (m, 2H), 6.88 - 6.74 (m, 3H), 5.81 (d,  $J = 15.6$  Hz, 1H), 3.69 (s, 3H), 3.02 - 2.85 (m, 1H), 2.76 - 2.52 (m, 4H), 2.33 (s, 3H).  $^{13}C$  NMR (101 MHz,  $CDCl_3$ )  $\delta$  190.7, 166.7, 146.6, 146.5, 142.6, 138.3, 137.7, 132.6, 128.6, 128.5, 128.4, 128.2, 127.9, 127.6, 124.4, 122.7, 51.4, 44.2, 39.3, 38.7, 21.5. The enantiomeric excess was determined by HPLC with AS-H column. ( $n$ -hexane: $i$ -PrOH = 80:20), 1mL/min; major enantiomer  $t_R = 10.78$  min, minor enantiomer  $t_R = 11.55$  min. HRMS (ESI) :  $[M+H]^+$  calcd for  $[C_{23}H_{25}O_3]$ : 349.1798, found: 349.1799.

**(1S,2S,3R,4R,6R)-4-(2-oxo-2-phenylethyl)-2,6-diphenylcyclohexane-1,3-dicarbaldehyde**

**(6a)**

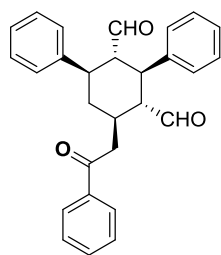

White solid;  $[\alpha]_D^{20} = +31$  ( $c$  1.0,  $\text{CH}_2\text{Cl}_2$ , 97% ee); IR(KBr  $\text{cm}^{-1}$ ): 2955, 2924, 2870, 2850, 1719, 1684, 1596, 1494, 1456, 1446, 1394, 1286, 1276;  $^1\text{H}$  NMR (400 MHz,  $\text{CDCl}_3$ )  $\delta$  9.42 (d,  $J = 4.0$  Hz, 1H), 9.24 (d,  $J = 2.8$  Hz, 1H), 7.89 (d,  $J = 7.6$  Hz, 2H), 7.54 (t,  $J = 7.2$  Hz, 1H), 7.43 (t,  $J = 7.6$  Hz, 2H), 7.33 – 7.14 (m, 10H), 3.40 (t,  $J = 10.4$  Hz, 1H), 3.20 – 3.03 (m, 3H), 2.88 (dd,  $J = 17.1, 7.6$  Hz, 1H), 2.84 – 2.66 (m, 2H), 2.21 (d,  $J = 13.2$  Hz, 1H), 1.62 (dd,  $J = 24.1, 11.7$  Hz, 1H).  $^{13}\text{C}$  NMR (101 MHz,  $\text{CDCl}_3$ )  $\delta$  203.3, 202.9, 198.2, 141.6, 138.7, 136.7, 133.3, 129.2, 128.8, 128.6, 128.0, 128.0, 127.8, 127.3, 127.2, 60.0, 59.9, 46.0, 45.0, 42.4, 39.6, 33.1. HPLC: The enantiomeric excess was determined by HPLC with an AD-H column after converted to corresponding ester **7a** with  $\text{Ph}_3\text{PCHCOOMe}$  (hexane: *i*-PrOH = 70:30), 1.0 mL/min; minor enantiomer  $t = 9.64$  min, major enantiomer  $t = 13.28$  min. HRMS (ESI):  $[\text{M}+\text{H}]^+$  calcd for  $[\text{C}_{28}\text{H}_{27}\text{O}_3]$ : 411.1955, found: 411.1952.

**(1S,2S,3R,4R,6R)-2-(4-chlorophenyl)-4-(2-oxo-2-phenylethyl)-6-phenylcyclohexane-1,3-dicarbaldehyde (6b)**

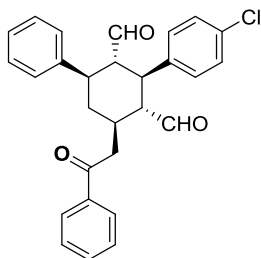

White solid;  $[\alpha]_D^{20} = +21$  ( $c$  1.0,  $\text{CH}_2\text{Cl}_2$ , 96% ee); IR(KBr  $\text{cm}^{-1}$ ): 3060, 2954, 2923, 2851, 2724, 1722, 1681, 1597, 1580, 1492, 1448, 1410, 1090, 1013;  $^1\text{H}$  NMR (400 MHz,  $\text{CDCl}_3$ )  $\delta$  9.42 (d,  $J = 4.0$  Hz, 1H), 9.23 (d,  $J = 2.4$  Hz, 1H), 7.88 (d,  $J = 7.6$  Hz, 2H), 7.55 (t,  $J = 7.2$  Hz, 1H), 7.43 (t,  $J = 7.6$  Hz, 2H), 7.33 – 7.13 (m, 9H), 3.41 (t,  $J = 10.6$  Hz, 1H), 3.09 (m, 3H), 2.90 (dd,  $J = 17.2, 7.6$  Hz, 1H), 2.77 (dd,  $J = 7.6, 3.6$  Hz, 1H), 2.67 (td,  $J = 11.2, 4.0$  Hz, 1H), 2.21 (d,  $J = 13.2$  Hz, 1H), 1.63 (dd,  $J = 24.8, 12.0$  Hz, 1H).  $^{13}\text{C}$  NMR (101 MHz,  $\text{CDCl}_3$ )  $\delta$  202.9, 202.6, 198.1, 141.3, 137.4, 136.7, 133.6, 133.4, 129.4, 129.4, 128.9, 128.7, 128.0, 127.3, 127.3, 59.9, 59.8, 45.3, 45.1, 42.3, 39.5, 33.1. HPLC: The enantiomeric excess was determined by HPLC with an AD-H column after converted to corresponding ester **7b** with  $\text{Ph}_3\text{PCHCOOMe}$  (hexane: *i*-PrOH = 70:30), 1.0

mL/min; minor enantiomer  $t = 11.70$  min, major enantiomer  $t = 18.82$  min. HRMS (ESI):  $[M+H]^+$  calcd for  $[C_{28}H_{26}ClO_3]$ : 445.1565, found: 445.1566.

**(1S,2S,3R,4R,6R)-4-(2-oxo-2-phenylethyl)-6-phenyl-2-(p-tolyl)cyclohexane-1,3-dicarbaldehyde (6c)**

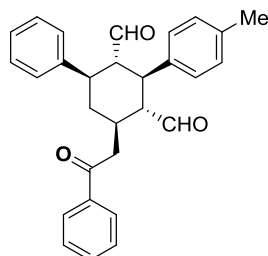

White solid;  $[\alpha]_D^{20} = +12$  ( $c$  0.5,  $CH_2Cl_2$ , 98% ee); IR(KBr  $cm^{-1}$ ): 3060, 2955, 2923, 2869, 2851, 1719, 1678, 1457, 1378, 1023;  $^1H$  NMR (400 MHz,  $CDCl_3$ )  $\delta$  9.42 (d,  $J = 4.4$  Hz, 1H), 9.25 (d,  $J = 2.4$  Hz, 1H), 7.89 (d,  $J = 7.6$  Hz, 2H), 7.55 (t,  $J = 7.6$  Hz, 1H), 7.44 (t,  $J = 7.6$  Hz, 2H), 7.33 - 7.15 (m, 5H), 7.15 - 7.06 (m, 4H), 3.36 (t,  $J = 10.8$  Hz, 1H), 3.16 - 3.03 (m, 3H), 2.88 (dd,  $J = 17.2, 7.6$  Hz, 1H), 2.83 - 2.63 (m, 2H), 2.27 (s, 3H), 2.24 - 2.15 (m, 1H), 1.68 - 1.55 (m, 1H).  $^{13}C$  NMR (101 MHz,  $CDCl_3$ )  $\delta$  203.5, 203.0, 198.2, 141.7, 137.5, 136.7, 135.6, 133.3, 129.9, 128.8, 128.6, 128.0, 127.8, 127.4, 127.2, 60.1, 60.0, 45.7, 45.0, 42.5, 39.6, 33.1, 21.0. HPLC: The enantiomeric excess was determined by HPLC with an AD-H column after converted to corresponding ester **7c** with  $Ph_3PCHCOOMe$  (hexane:  $i$ -PrOH = 70:30), 1.0 mL/min; minor enantiomer  $t = 7.58$  min, major enantiomer  $t = 10.30$  min. HRMS (ESI):  $[M+H]^+$  calcd for  $[C_{29}H_{29}O_3]$ : 425.2111, found: 425.2109.

**(1S,2S,3R,4R,6R)-2-(2-chlorophenyl)-4-(2-oxo-2-phenylethyl)-6-phenylcyclohexane-1,3-dicarbaldehyde (6d)**

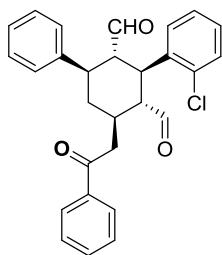

White solid;  $[\alpha]_D^{20} = +10$  ( $c$  1.0,  $CH_2Cl_2$ , 99% ee); IR(KBr  $cm^{-1}$ ): 2955, 2924, 2870, 2852, 1722, 1673, 1450, 1214, 1033, 1015;  $^1H$  NMR (400 MHz,  $CDCl_3$ )  $\delta$  9.46 (d,  $J = 3.2$  Hz, 1H), 9.28 (d,  $J = 4.0$  Hz, 1H), 7.89 (d,  $J = 7.6$  Hz, 2H), 7.55 (t,  $J = 7.6$  Hz, 1H), 7.50 - 7.40 (m, 3H), 7.40 - 7.08 (m, 8H), 4.17 (t,  $J = 11.2$  Hz, 1H), 3.30 - 2.80 (m, 5H), 2.70 - 2.50 (m, 1H), 2.26 (d,  $J = 10.4$  Hz, 1H), 1.80 - 1.52 (m, 1H).  $^{13}C$  NMR (101 MHz,  $CDCl_3$ )  $\delta$  202.5, 201.4, 198.0, 141.4, 136.7, 136.5, 133.6, 133.4, 130.0, 128.9, 128.8, 128.6, 128.5, 128.0, 127.8, 127.3, 61.0, 60.5, 44.7, 42.4, 40.2, 39.4, 32.9. HPLC: The enantiomeric excess was determined by HPLC with an AD-H column after converted to corresponding ester **7d** with  $Ph_3PCHCOOMe$  (hexane:

*i*-PrOH = 70:30), 1.0 mL/min; minor enantiomer  $t = 7.32$  min, major enantiomer  $t = 12.17$  min. HRMS (ESI):  $[M+H]^+$  calcd for  $[C_{28}H_{26}ClO_3]$ : 445.1565, found: 445.1562.

**(1S,2S,3R,4R,6R)-2-(3,5-dichlorophenyl)-4-(2-oxo-2-phenylethyl)-6-phenylcyclohexane-1,3-dicarbaldehyde (6e)**

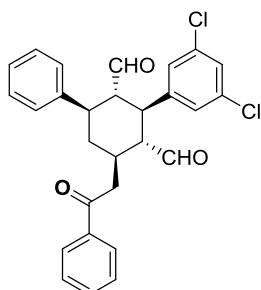

**,3-dicarbaldehyde (6e)**

White solid;  $[\alpha]_D^{20} = +25$  ( $c$  1.0,  $CH_2Cl_2$ , 94% ee); IR(KBr  $cm^{-1}$ ): 2955, 2924, 2852, 2725, 1723, 1682, 1587, 1566, 1449, 1433, 1215;

$^1H$  NMR (400 MHz,  $CDCl_3$ )  $\delta$  9.45 (d,  $J = 4.4$  Hz, 1H), 9.24 (d,  $J = 2.4$  Hz, 1H), 7.88 (d,  $J = 7.2$  Hz, 2H), 7.55 (t,  $J = 7.2$  Hz, 1H), 7.44 (t,  $J = 7.6$  Hz, 2H), 7.35 – 7.15 (m, 6H), 7.13 (d,  $J = 1.6$  Hz, 2H),

3.40 (t,  $J = 11.2$  Hz, 1H), 3.16 – 2.92 (m, 3H), 2.92 – 2.82 (m, 1H), 2.82 – 2.60 (m, 2H), 2.20 (d,  $J = 13.6$  Hz, 1H), 1.65 (dd,  $J = 24.8, 12.8$  Hz, 1H).  $^{13}C$  NMR (101 MHz,  $CDCl_3$ )  $\delta$  202.5, 202.3, 197.9, 142.7, 141.0, 136.6, 135.6, 133.4, 129.0, 128.7, 128.1, 127.9, 127.5, 127.3, 126.6, 59.6, 59.3, 45.4, 44.9, 42.2, 39.5, 33.0. HPLC: The enantiomeric excess was determined by HPLC with an AD-H column after converted to corresponding ester **7e** with  $Ph_3PCHCOOMe$  (hexane: *i*-PrOH = 70:30), 1.0 mL/min; minor enantiomer  $t = 9.91$  min, major enantiomer  $t = 11.99$  min. HRMS (ESI):  $[M+H]^+$  calcd for  $[C_{28}H_{25}Cl_2O_3]$ : 479.1175, found: 479.1171.

**(1S,2S,3R,4R,6R)-4-(2-oxo-2-phenylethyl)-6-phenyl-2-(4-(trifluoromethyl)phenyl)cyclohexane-1,3-dicarbaldehyde (6f)**

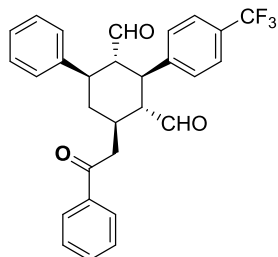

White solid;  $[\alpha]_D^{20} = +22$  ( $c$  1.0,  $CH_2Cl_2$ , 95% ee); IR(KBr  $cm^{-1}$ ): 2952, 2924, 2851, 1719, 1674, 1620, 1450, 1330, 1287, 1165,

1118, 1069;  $^1H$  NMR (400 MHz,  $CDCl_3$ )  $\delta$  9.43 (d,  $J = 4.0$  Hz, 1H), 9.23 (d,  $J = 2.8$  Hz, 1H), 7.88 (d,  $J = 7.2$  Hz, 2H), 7.63 - 7.48 (m, 3H), 7.44 (t,  $J = 7.6$  Hz, 2H), 7.36 (d,  $J = 8.0$  Hz, 2H), 7.33 -

7.14 (m, 5H), 3.51 (t,  $J = 10.8$  Hz, 1H), 3.21 - 3.00 (m, 3H), 2.92 (dd,  $J = 17.2, 7.2$  Hz, 1H), 2.86 - 2.67 (m, 2H), 2.29 - 2.16 (m, 1H), 1.67 (dd,  $J = 24.8, 11.2$  Hz, 1H).  $^{13}C$  NMR (101

MHz, CDCl<sub>3</sub>)  $\delta$  202.7, 202.50, 198.0, 143.2, 141.1, 136.6, 133.4, 129.9 (q,  $J = 33$  Hz), 128.9, 128.7, 128.6, 127.9, 127.4, 127.3, 126.1 (q,  $J = 4$  Hz), 123.8 (q,  $J = 271$  Hz), 59.8, 59.6, 45.4, 45.3, 42.2, 39.6, 33.1. HPLC: The enantiomeric excess was determined by HPLC with an AD-H column after converted to corresponding ester **7f** with Ph<sub>3</sub>PCHCOOMe (hexane: *i*-PrOH = 70:30), 1.0 mL/min; minor enantiomer  $t = 11.47$  min, major enantiomer  $t = 19.47$  min. HRMS (ESI):  $[M+H]^+$  calcd for [C<sub>29</sub>H<sub>26</sub>F<sub>3</sub>O<sub>3</sub>]: 479.1829, found: 479.1826.

**(1S,2S,3R,4R,6R)-2-(4-bromophenyl)-4-(2-oxo-2-phenylethyl)-6-phenylcyclohexane-1,3-dicarbaldehyde (6g)**

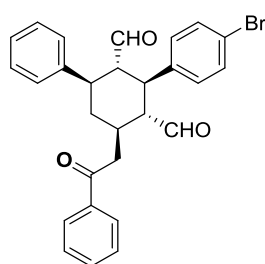

White solid;  $[\alpha]_D^{20} = +22$  ( $c$  1.0, CH<sub>2</sub>Cl<sub>2</sub>, 97% ee); IR(KBr cm<sup>-1</sup>): 2956, 2923, 2851, 1718, 1683, 1489, 1458, 1378, 1013; <sup>1</sup>H NMR (400 MHz, CDCl<sub>3</sub>)  $\delta$  9.41 (d,  $J = 4.4$  Hz, 1H), 9.21 (d,  $J = 2.4$  Hz, 1H), 7.88 (d,  $J = 7.2$  Hz, 2H), 7.53 (t,  $J = 7.6$  Hz, 1H), 7.48 - 7.35

(m, 4H), 7.33 - 7.15 (m, 6H), 7.10 (d,  $J = 8.4$  Hz, 2H), 3.39 (t,  $J = 10.8$  Hz, 1H), 3.16 - 2.99 (m, 3H), 2.89 (dd,  $J = 17.2, 7.6$  Hz, 1H), 2.84 - 2.62 (m, 2H), 2.20 (d,  $J = 13.2$  Hz, 1H), 1.62 (dd,  $J = 24.8, 12.8$  Hz, 1H). <sup>13</sup>C NMR (101 MHz, CDCl<sub>3</sub>)  $\delta$  202.9, 202.6, 198.0, 141.3, 137.9, 136.6, 133.3, 132.2, 129.7, 128.8, 128.6, 127.9, 127.2, 121.5, 59.8, 59.6, 45.1, 45.0, 42.2, 39.4, 33.0. HPLC: The enantiomeric excess was determined by HPLC with an AD-H column after converted to corresponding ester **7g** with Ph<sub>3</sub>PCHCOOMe (hexane: *i*-PrOH = 70:30), 1.0 mL/min; minor enantiomer  $t = 14.20$  min, major enantiomer  $t = 22.37$  min. HRMS (ESI):  $[M+H]^+$  calcd for [C<sub>28</sub>H<sub>26</sub>BrO<sub>3</sub>]: 489.1060, found: 489.1059.

**(1S,2S,3R,4R,6R)-2-(2-fluorophenyl)-4-(2-oxo-2-phenylethyl)-6-phenylcyclohexane-1,3-dicarbaldehyde (6h)**

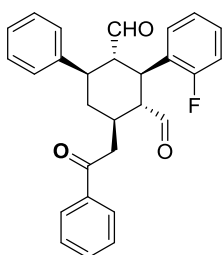

White solid;  $[\alpha]_D^{20} = +21$  ( $c$  1.0, CH<sub>2</sub>Cl<sub>2</sub>, 97% ee); IR(KBr cm<sup>-1</sup>): 2952, 2921, 2850, 1718, 1685, 1598, 1579, 1511, 1447, 1285, 1231, 1162, 1100, 838; <sup>1</sup>H NMR (400 MHz, CDCl<sub>3</sub>)  $\delta$  9.42 (d,  $J = 4.4$  Hz, 1H), 9.24 (d,  $J = 2.0$  Hz, 1H), 7.88 (d,  $J = 7.6$  Hz, 2H), 7.55 (t,  $J = 7.2$  Hz, 1H), 7.44 (t,  $J = 7.6$  Hz, 2H), 7.36 - 7.11 (m, 7H), 6.98 (t,  $J = 8.4$  Hz, 2H),



3.42 (t,  $J = 10.8$  Hz, 1H), 3.18 - 2.99 (m, 3H), 2.90 (dd,  $J = 17.2, 7.6$  Hz, 1H), 2.85 - 2.70 (m, 1H), 2.67 (td,  $J = 11.2, 4.4$  Hz, 1H), 2.21 (d,  $J = 13.2$  Hz, 1H), 1.75 - 1.52 (m, 1H).  $^{13}\text{C}$  NMR (101 MHz,  $\text{CDCl}_3$ )  $\delta$  203.1, 202.8, 198.1, 162.0 (d,  $J = 245$  Hz), 141.4, 136.7, 134.6, 134.6, 133.4, 129.6, 129.6, 128.9, 128.6, 128.0, 127.3, 116.2, 116.0, 60.1, 60.0, 45.2, 45.0, 42.3, 39.5, 33.1. HPLC: The enantiomeric excess was determined by HPLC with an AD-H column after converted to corresponding ester **7h** with  $\text{Ph}_3\text{PCHCOOMe}$  (hexane: *i*-PrOH = 70:30), 1.0 mL/min; minor enantiomer  $t = 11.70$  min, major enantiomer  $t = 15.81$  min. HRMS (ESI) :  $[\text{M}+\text{H}]^+$  calcd for  $[\text{C}_{28}\text{H}_{26}\text{FO}_3]$ : 419.1860, found: 419.1858.

**(1S,2S,3R,4R,6R)-4-(2-(4-chlorophenyl)-2-oxoethyl)-2,6-diphenylcyclohexane-1,3-dicarbaldehyde (6i)**

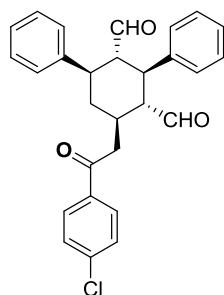

White solid;  $[\alpha]_{\text{D}}^{20} = +31$  ( $c$  1.0,  $\text{CH}_2\text{Cl}_2$ , 94% ee); IR(KBr  $\text{cm}^{-1}$ ): 3418, 2956, 2924, 2869, 2851, 1716, 1673, 1587, 1493, 1456, 1285, 1090, 1009;  $^1\text{H}$  NMR (400 MHz,  $\text{CDCl}_3$ )  $\delta$  9.41 (d,  $J = 4.0$  Hz, 1H), 9.24 (d,  $J = 2.8$  Hz, 1H), 7.83 (d,  $J = 8.4$  Hz, 2H), 7.41 (d,  $J = 8.4$  Hz, 2H), 7.34 - 7.09 (m, 10H), 3.38 (t,  $J = 10.4$  Hz, 1H), 3.23 - 2.98 (m, 3H), 2.88 - 2.63 (m, 3H), 2.29 - 2.13 (m, 1H), 1.61 (dd,  $J = 24.0, 11.6$  Hz, 1H).  $^{13}\text{C}$  NMR (101 MHz,  $\text{CDCl}_3$ )  $\delta$  203.4, 202.8, 197.0, 141.6, 139.8, 138.6, 135.0, 129.4, 129.2, 129.0, 128.9, 128.0, 127.9, 127.3, 127.3, 59.9, 46.1, 45.1, 42.4, 39.6, 33.0. HPLC: The enantiomeric excess was determined by HPLC with an AD-H column after converted to corresponding **7i** ester with  $\text{Ph}_3\text{PCHCOOMe}$  (hexane: *i*-PrOH = 70:30), 1.0 mL/min; minor enantiomer  $t = 16.78$  min, major enantiomer  $t = 18.62$  min. HRMS (ESI) :  $[\text{M}+\text{H}]^+$  calcd for  $[\text{C}_{28}\text{H}_{26}\text{ClO}_3]$ : 445.1565, found: 445.1561.

**(1S,2S,3R,4R,6R)-4-(2-oxo-2-(*m*-tolyl)ethyl)-2,6-diphenylcyclohexane-1,3-dicarbaldehyde (6j)**

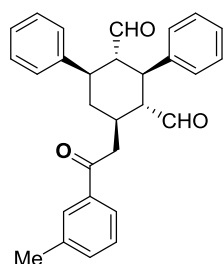

White solid;  $[\alpha]_{\text{D}}^{20} = +48$  ( $c$  0.5,  $\text{CH}_2\text{Cl}_2$ , 95% ee); IR(KBr  $\text{cm}^{-1}$ ): 3425, 2955, 2922, 2869, 2851, 1721, 1679, 1602, 1585, 1494, 1455, 1377, 1157, 1030;  $^1\text{H}$  NMR (400 MHz,  $\text{CDCl}_3$ )  $\delta$  9.43 (d,  $J = 4.4$  Hz, 1H), 9.24

(d,  $J = 2.8$  Hz, 1H), 7.68 (d,  $J = 9.2$  Hz, 2H), 7.40 - 7.13 (m, 12H), 3.40 (t,  $J = 10.8$  Hz, 1H), 3.18 - 3.04 (m, 3H), 2.95 - 2.65 (m, 3H), 2.39 (s, 3H), 2.22 (d,  $J = 10.0$  Hz, 1H), 1.61 (dd,  $J = 24.4, 11.6$  Hz, 1H).  $^{13}\text{C}$  NMR (101 MHz,  $\text{CDCl}_3$ )  $\delta$  203.4, 202.9, 198.4, 141.7, 138.7, 138.5, 136.8, 134.1, 129.2, 128.8, 128.5, 128.5, 128.0, 127.8, 127.4, 127.2, 125.2, 60.1, 59.9, 46.0, 45.1, 42.5, 39.6, 33.1, 21.3. HPLC: The enantiomeric excess was determined by HPLC with an AD-H column after converted to corresponding ester **7j** with  $\text{Ph}_3\text{PCHCOOMe}$  (hexane: *i*-PrOH = 70:30), 1.0 mL/min; minor enantiomer  $t = 7.82$  min, major enantiomer  $t = 11.05$  min. HRMS (ESI) :  $[\text{M}+\text{H}]^+$  calcd for  $[\text{C}_{29}\text{H}_{29}\text{O}_3]$ : 425.2111, found: 425.2110.

**(1S,2S,3R,4R,6R)-4-(2-(4-bromophenyl)-2-oxoethyl)-2,6-diphenylcyclohexane-1,3-dicarbaldehyde (6k)**

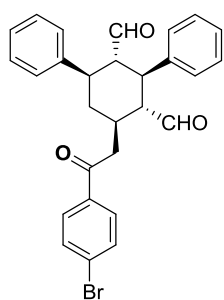

White solid;  $[\alpha]_{\text{D}}^{20} = +27$  ( $c$  1.0,  $\text{CH}_2\text{Cl}_2$ , 92% ee); IR(KBr  $\text{cm}^{-1}$ ): 3028, 2955, 2913, 2839, 2736, 1716, 1673, 1600, 1585, 1567, 1494, 1455, 1433, 1397, 1314, 1293, 1164, 1069, 1006.  $^1\text{H}$  NMR (400 MHz, DMSO)  $\delta$  9.38 (d,  $J = 3.6$  Hz, 1H), 9.23 (d,  $J = 3.2$  Hz, 1H), 7.82 (d,  $J = 8.4$  Hz, 2H), 7.71 (d,  $J = 8.0$  Hz, 2H), 7.40 - 7.10 (m, 10H), 3.56 (t,  $J = 10.0$  Hz, 1H), 3.26 - 2.88 (m, 4H), 2.80 - 2.60 (m, 2H), 1.94 (d,  $J = 12.8$  Hz, 1H), 1.72 (dd,  $J = 22.0, 10.8$  Hz, 1H).  $^{13}\text{C}$  NMR (101 MHz, DMSO)  $\delta$  204.5, 203.7, 197.9, 142.7, 139.9, 135.6, 131.8, 129.9, 128.6, 128.5, 128.2, 127.5, 127.4, 127.1, 126.7, 59.2, 59.0, 44.2, 43.6, 42.3, 38.2, 32.6. HPLC: The enantiomeric excess was determined by HPLC with an AD-H column after converted to corresponding ester **7k** with  $\text{Ph}_3\text{PCHCOOMe}$  (hexane: *i*-PrOH = 70:30), 1.0 mL/min; minor enantiomer  $t = 13.84$  min, major enantiomer  $t = 17.80$  min. HRMS (ESI) :  $[\text{M}+\text{H}]^+$  calcd for  $[\text{C}_{29}\text{H}_{26}\text{BrO}_3]$ : 489.1060, found: 489.1058.

**(1S,2S,3R,4R,6R)-4-(2-oxo-2-(p-tolyl)ethyl)-2,6-diphenylcyclohexane-1,3-dicarbaldehyde**

**(6l)**

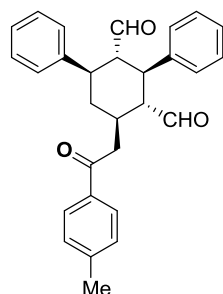

White solid;  $[\alpha]_D^{20} = +20$  ( $c$  1.0,  $\text{CH}_2\text{Cl}_2$ , 98% ee); IR(KBr  $\text{cm}^{-1}$ ): 3029, 2954, 2922, 2851, 2727, 1722, 1677, 1605, 1572, 1494, 1454, 1377, 1233, 1182, 1030;  $^1\text{H}$  NMR (400 MHz,  $\text{CDCl}_3$ )  $\delta$  9.42 (d,  $J = 4.0$  Hz, 1H), 9.24 (d,  $J = 2.8$  Hz, 1H), 7.79 (d,  $J = 8.4$  Hz, 2H), 7.37 - 7.07 (m, 12H), 3.39 (t,  $J = 10.4$  Hz, 1H), 3.21 - 2.99 (m, 3H), 2.90 - 2.65 (m, 3H), 2.38 (s, 3H), 2.27 - 2.15 (m, 1H), 1.60 (dd,  $J = 24.0, 11.6$  Hz, 1H).  $^{13}\text{C}$  NMR (101 MHz,  $\text{CDCl}_3$ )  $\delta$  203.4, 202.9, 197.9, 144.2, 141.6, 138.7, 134.2, 129.3, 129.2, 128.8, 128.7, 128.1, 128.0, 127.8, 127.3, 127.2, 60.0, 59.9, 45.9, 45.0, 42.3, 39.5, 33.1, 21.6. HPLC: The enantiomeric excess was determined by HPLC with an OD-H column after converted to corresponding ester **7l** with  $\text{Ph}_3\text{PCHCOOMe}$  (hexane: *i*-PrOH = 70:30), 1.0 mL/min; major enantiomer  $t = 16.51$  min, minor enantiomer  $t = 36.10$  min. HRMS (ESI) :  $[\text{M}+\text{H}]^+$  calcd for  $[\text{C}_{29}\text{H}_{29}\text{O}_3]$ : 425.2111, found: 425.2108.

**(1S,2S,3R,4R,6R)-4-(2-(2-fluorophenyl)-2-oxoethyl)-2,6-diphenylcyclohexane-1,3-dicarbaldehyde (6m)**

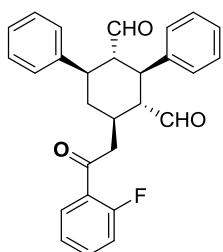

White solid;  $[\alpha]_D^{20} = +42$  ( $c$  0.5,  $\text{CH}_2\text{Cl}_2$ , 95% ee); IR(KBr  $\text{cm}^{-1}$ ): 2955, 2922, 2869, 2851, 2724, 1722, 1683, 1608, 1479, 1455, 1377, 1271, 1210, 1016;  $^1\text{H}$  NMR (400 MHz,  $\text{CDCl}_3$ )  $\delta$  9.42 (d,  $J = 4.4$  Hz, 1H), 9.25 (d,  $J = 2.8$  Hz, 1H), 7.78 (td,  $J = 7.6, 2.0$  Hz, 1H), 7.54 - 7.45 (m, 1H), 7.34 - 7.26 (m, 4H), 7.21 (dd,  $J = 13.6, 6.8$  Hz, 7H), 7.15 - 7.05 (m, 1H), 3.40 (t,  $J = 11.2$  Hz, 1H), 3.17 - 3.06 (m, 3H), 2.93 (ddd,  $J = 18.4, 7.6, 3.2$  Hz, 1H), 2.85 - 2.72 (m, 1H), 2.67 (td,  $J = 11.2, 6.8$  Hz, 1H), 2.26 - 2.17 (m, 1H), 1.64 (dd,  $J = 24.8, 12.0$  Hz, 1H).  $^{13}\text{C}$  NMR (101 MHz,  $\text{CDCl}_3$ )  $\delta$  203.1, 203.1, 196.5 (d,  $J = 4$  Hz), 161.8 (d,  $J = 253$  Hz), 141.7, 138.7, 134.8, (d,  $J = 9$  Hz), 130.6 (d,  $J = 2$  Hz), 129.2, 128.9, 128.1, 127.8, 127.4, 127.2, 125.5 (d,  $J = 13$  Hz), 124.5 (d,  $J = 4$  Hz), 116.7 (d,  $J = 24$  Hz), 60.0, 59.9, 47.5, 47.4, 45.9, 45.1, 39.7, 32.9. HPLC: The enantiomeric excess was determined by HPLC with an OD-H column after converted to corresponding ester **7m** with  $\text{Ph}_3\text{PCHCOOMe}$  (hexane:

*i*-PrOH = 70:30), 1.0 mL/min; major enantiomer *t* = 9.15 min, minor enantiomer *t* = 22.89 min. HRMS (ESI) : [M+H]<sup>+</sup> calcd for [C<sub>28</sub>H<sub>26</sub>FO<sub>3</sub>]: 429.1860, found: 429.1859.

**(1S,2S,3R,4R,6R)-4-(2-(3-chlorophenyl)-2-oxoethyl)-2,6-diphenylcyclohexane-1,3-dicarbaldehyde (6n)**

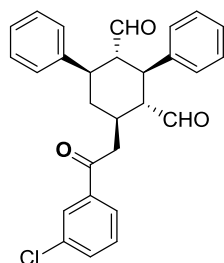

White solid;  $[\alpha]_D^{20} = +42$  (*c* 0.5, CH<sub>2</sub>Cl<sub>2</sub>, 97% ee); IR(KBr cm<sup>-1</sup>): 3424, 2955, 2924, 2869, 2851, 1721, 1686, 1599, 1571, 1494, 1456, 1377, 1211, 1022, 908; <sup>1</sup>H NMR (400 MHz, CDCl<sub>3</sub>) δ 9.41 (d, *J* = 4.0 Hz, 1H), 9.24 (d, *J* = 2.8 Hz, 1H), 7.86 (s, 1H), 7.76 (d, *J* = 7.6 Hz, 1H), 7.52 (d, *J* = 8.0 Hz, 1H), 7.40 - 7.15 (m, 11H), 3.39 (t, *J* = 10.4 Hz, 1H), 3.20 - 3.02 (m, 3H), 2.92 - 2.62 (m, 3H), 2.20 (d, *J* = 13.2 Hz, 1H), 1.62 (dd, *J* = 24.0, 11.2 Hz, 1H). <sup>13</sup>C NMR (101 MHz, CDCl<sub>3</sub>) δ 203.4, 202.9, 196.9, 141.5, 138.6, 138.2, 135.0, 133.2, 130.0, 129.2, 128.9, 128.1, 128.0, 127.9, 127.3, 127.2, 126.1, 59.9, 59.8, 46.0, 45.0, 42.6, 39.5, 32.9. HPLC: The enantiomeric excess was determined by HPLC with an AD-H column after converted to corresponding ester **7n** with Ph<sub>3</sub>PCHCOOMe (hexane: *i*-PrOH = 70:30), 1.0 mL/min; minor enantiomer *t* = 9.7 min, major enantiomer *t* = 14.6 min. HRMS (ESI) : [M+H]<sup>+</sup> calcd for [C<sub>28</sub>H<sub>26</sub>ClO<sub>3</sub>]: 445.1565, found: 445.1564.

**(1S,2S,3R,4R,6R)-4-(2-(4-methoxyphenyl)-2-oxoethyl)-2,6-diphenylcyclohexane-1,3-dicarbaldehyde (6o)**

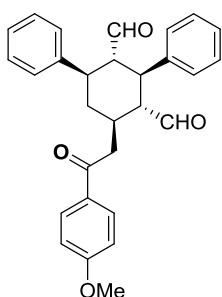

White solid;  $[\alpha]_D^{20} = +42$  (*c* 0.5, CH<sub>2</sub>Cl<sub>2</sub>, 98% ee); IR(KBr cm<sup>-1</sup>): 3417, 3028, 2955, 2922, 2850, 1719, 1668, 1599, 1574, 1510, 1456, 1419, 1377, 1317, 1253, 1168, 1030; <sup>1</sup>H NMR (400 MHz, CDCl<sub>3</sub>) δ 9.42 (d, *J* = 4.4 Hz, 1H), 9.24 (d, *J* = 3.2 Hz, 1H), 7.88 (d, *J* = 8.8 Hz, 2H), 7.34 - 7.14 (m, 10H), 6.94 - 6.86 (m, 2H), 3.84 (s, 3H), 3.39 (t, *J* = 10.4 Hz, 1H), 3.19 - 3.00 (m, 3H), 2.86 - 2.65 (m, 3H), 2.21 (d, *J* = 10.4 Hz, 1H), 1.60 (dd, *J* = 24.0, 12.8 Hz, 1H). <sup>13</sup>C NMR (101 MHz, CDCl<sub>3</sub>) δ 203.4, 202.9, 196.7, 163.7, 141.7, 138.8, 130.3, 129.8, 129.2, 128.8, 128.0, 127.8, 127.3, 127.2, 113.8, 60.1, 59.9, 55.4, 46.0, 45.1, 42.1, 39.6, 33.3. HPLC: The product was converted to corresponding ester **7o** with Ph<sub>3</sub>PCHCOOMe and enantiomeric

excess was determined by HPLC with an AD-H column (hexane: *i*-PrOH = 80:20), 1.0 mL/min; minor enantiomer  $t = 23.44$  min, major enantiomer  $t = 26.94$  min. HRMS (ESI) :  $[M+H]^+$  calcd for  $[C_{29}H_{29}O_4]$ : 441.2060, found: 441.2058.

**(1S,2S,3R,4R,6R)-4-(2-(4-fluorophenyl)-2-oxoethyl)-2,6-diphenylcyclohexane-1,3-dicarbaldehyde (6p)**

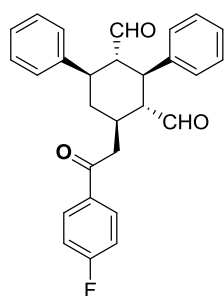

White solid;  $[\alpha]_D^{20} = +25$  ( $c$  1.0,  $CH_2Cl_2$ , 97% ee); IR(KBr  $cm^{-1}$ ): 2955, 2920, 2850, 2729, 1715, 1683, 1672, 1595, 1506, 1495, 1455, 1435, 1410, 1231, 1175, 1101;  $^1H$  NMR (400 MHz,  $CDCl_3$ )  $\delta$  9.41 (d,  $J = 3.6$  Hz, 1H), 9.24 (d,  $J = 2.4$  Hz, 1H), 7.92 (dd,  $J = 8.4, 5.6$  Hz, 2H), 7.34 - 7.14 (m, 10H), 7.10 (t,  $J = 8.4$  Hz, 2H), 3.39 (t,  $J = 10.4$  Hz, 1H), 3.20 - 3.03 (m, 3H), 2.88 - 2.65 (m, 3H), 2.20 (d,  $J = 13.2$  Hz, 1H), 1.61 (dd,  $J = 23.6, 12.0$  Hz, 1H).  $^{13}C$  NMR (101 MHz,  $CDCl_3$ )  $\delta$  203.4, 202.8, 196.6, 165.9 (d,  $J = 250$  Hz), 141.6, 138.6, 133.1 (d,  $J = 3$  Hz), 130.7 (d,  $J = 9$  Hz), 129.2, 128.8, 128.0, 127.8, 127.3, 127.2, 115.8 (d,  $J = 22$  Hz), 59.9, 59.8, 46.0, 45.0, 42.4, 39.6, 33.0. HPLC: The enantiomeric excess was determined by HPLC with an AD-H column after converted to corresponding ester **7p** with  $Ph_3PCHCOOMe$  (hexane: *i*-PrOH = 80:20), 1.0 mL/min; minor enantiomer  $t = 19.28$  min, major enantiomer  $t = 25.31$  min. HRMS (ESI) :  $[M+H]^+$  calcd for  $[C_{28}H_{26}FO_3]$ : 429.1860, found: 429.1858.

**(1S,2S,3R,4R,6R)-4-(2-oxo-2-phenylethyl)-2-phenyl-6-(*p*-tolyl)cyclohexane-1,3-dicarbaldehyde (6q)**

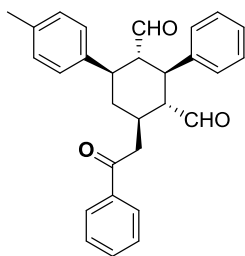

White solid;  $[\alpha]_D^{20} = +16$  ( $c$  1.0,  $CH_2Cl_2$ , 95% ee); IR(KBr  $cm^{-1}$ ): 2955, 2923, 2851, 1723, 1682, 1597, 1580, 1514, 1449, 1377, 1218, 1182, 1021;  $^1H$  NMR (400 MHz,  $CDCl_3$ )  $\delta$  9.42 (d,  $J = 4.4$  Hz, 1H), 9.24 (d,  $J = 3.2$  Hz, 1H), 7.96 - 7.85 (m, 2H), 7.59 - 7.51 (m, 1H), 7.43 (t,  $J = 7.6$  Hz, 2H), 7.34 - 7.16 (m, 5H), 7.12 - 7.06 (m, 4H), 3.39 (t,  $J = 10.8$  Hz, 1H), 3.17 - 3.00 (m, 3H), 2.88 (dd,  $J = 17.2, 7.6$  Hz, 1H), 2.83 - 2.65 (m, 1H), 2.27 (s, 3H), 2.19 (dt,  $J = 13.2, 3.2$  Hz, 1H), 1.59 (dd,  $J = 24.8, 11.6$  Hz, 1H).  $^{13}C$  NMR (101 MHz,

CDCl<sub>3</sub>)  $\delta$  203.4, 203.0, 198.2, 138.8, 138.6, 136.8, 136.7, 133.3, 129.5, 129.2, 128.6, 128.0, 128.0, 127.8, 127.2, 60.0, 60.0, 46.0, 44.7, 42.4, 39.7, 33.1, 21.0. HPLC: The enantiomeric excess was determined by HPLC with an AD-H column after converted to corresponding ester **7q** with Ph<sub>3</sub>PCHCOOMe (hexane: *i*-PrOH = 80:20), 1.0 mL/min; minor enantiomer *t* = 10.10 min, major enantiomer *t* = 16.57 min. HRMS (ESI) : [M+H]<sup>+</sup> calcd for [C<sub>29</sub>H<sub>29</sub>O<sub>3</sub>]: 425.2111, found: 425.2108.

**(1R,2S,3S,4R,6R)-4-(4-methoxyphenyl)-6-(2-oxo-2-phenylethyl)-2-phenylcyclohexane-1,3-dicarbaldehyde (6r)**

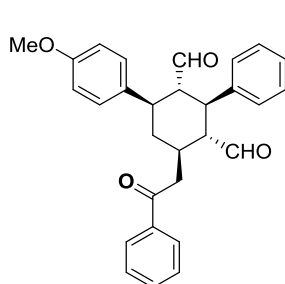

White solid;  $[\alpha]_D^{20} = +26$  (*c* 1.0, CH<sub>2</sub>Cl<sub>2</sub>, 97% ee); IR(KBr cm<sup>-1</sup>): 2954, 2923, 2850, 2740, 1718, 1682, 1612, 1597, 1580, 1515, 1457, 1446, 1246, 1178, 1030, 1002; <sup>1</sup>H NMR (400 MHz, CDCl<sub>3</sub>)  $\delta$  9.42 (d, *J* = 4.0 Hz, 1H), 9.24 (d, *J* = 2.8 Hz, 1H), 7.93 - 7.83 (m, 2H), 7.61 - 7.50 (m, 1H), 7.43 (t, *J* = 7.6 Hz, 2H), 7.33 - 7.26 (m, 2H), 7.25 -

7.16 (m, 3H), 7.15 - 7.08 (m, 2H), 6.81 (d, *J* = 8.8 Hz, 2H), 3.74 (s, 3H), 3.39 (t, *J* = 11.2 Hz, 1H), 3.17 - 2.97 (m, 3H), 2.88 (dd, *J* = 17.2, 7.6 Hz, 1H), 2.81 - 2.63 (m, 2H), 2.25 - 2.12 (m, 1H), 1.66 - 1.51 (m, 1H). <sup>13</sup>C NMR (101 MHz, CDCl<sub>3</sub>)  $\delta$  203.4, 203.0, 198.2, 158.6, 138.8, 136.7, 133.7, 133.3, 129.2, 128.6, 128.3, 128.0, 128.0, 127.8, 114.2, 60.2, 60.0, 55.2, 46.0, 44.2, 42.4, 39.8, 33.1. HPLC: The enantiomeric excess was determined by HPLC with an AS-H column after converted to corresponding ester **7r** with Ph<sub>3</sub>PCHCOOMe (hexane: *i*-PrOH = 80:20), 1.0 mL/min; minor enantiomer *t* = 11.04 min, major enantiomer *t* = 16.41 min. HRMS (ESI) : [M+H]<sup>+</sup> calcd for [C<sub>29</sub>H<sub>29</sub>O<sub>4</sub>]: 441.2060, found: 441.2059.

**(1R,2S,3S,4R,6R)-4-(4-bromophenyl)-6-(2-oxo-2-phenylethyl)-2-phenylcyclohexane-1,3-dicarbaldehyde (6s)**

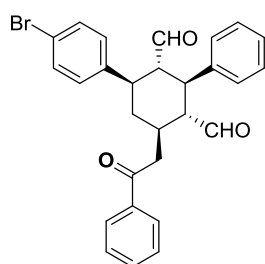

White solid;  $[\alpha]_D^{20} = +21$  (*c* 1.0, CH<sub>2</sub>Cl<sub>2</sub>, 99% ee); IR(KBr cm<sup>-1</sup>): 2955, 2922, 2850, 2731, 1714, 1688, 1678, 1596, 1488, 1448, 1160, 1073, 1010, 978; <sup>1</sup>H NMR (400 MHz, CDCl<sub>3</sub>)  $\delta$  9.41 (d, *J* = 3.8 Hz, 1H), 9.23 (d, *J* = 2.4 Hz, 1H), 7.93 - 7.82 (m, 2H), 7.55 (t, *J* = 7.4

Hz, 1H), 7.48 – 7.36 (m, 4H), 7.34 – 7.26 (m, 2H), 7.24 – 7.18 (m, 3H), 7.09 (d,  $J = 8.4$  Hz, 2H), 3.36 (t,  $J = 10.7$  Hz, 1H), 3.16 – 3.03 (m, 3H), 2.88 (dd,  $J = 17.2, 7.5$  Hz, 1H), 2.81 – 2.67 (m, 2H), 2.18 (d,  $J = 13.3$  Hz, 1H), 1.66 – 1.54 (m, 1H).  $^{13}\text{C}$  NMR (101 MHz,  $\text{CDCl}_3$ )  $\delta$  203.1, 202.6, 198.1, 140.7, 138.4, 136.6, 133.4, 131.9, 129.3, 129.1, 128.7, 128.0, 120.9, 59.8, 59.8, 46.2, 44.3, 42.3, 39.3, 33.0. HPLC: The enantiomeric excess was determined by HPLC with an AD-H column after converted to corresponding ester **7s** with  $\text{Ph}_3\text{PCHCOOMe}$  (hexane: *i*-PrOH = 70:30), 1.0 mL/min; minor enantiomer  $t = 10.16$  min, major enantiomer  $t = 17.32$  min. HRMS (ESI) :  $[\text{M}+\text{H}]^+$  calcd for  $[\text{C}_{28}\text{H}_{26}\text{BrO}_3]$ : 489.1060, found: 489.1059.

**(1S,2S,3R,4R,6R)-4-(2-oxo-2-phenylethyl)-2-phenyl-6-(*m*-tolyl)cyclohexane-1,3-dicarbaldehyde (**6t**)**

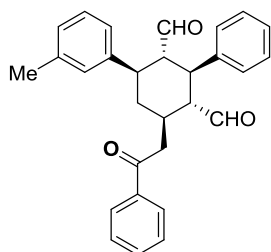

White solid;  $[\alpha]_{\text{D}}^{20} = +23$  ( $c$  1.0,  $\text{CH}_2\text{Cl}_2$ , 95% ee); IR(KBr  $\text{cm}^{-1}$ ): 2954, 2922, 2850, 2735, 1715, 1680, 1598, 1581, 1493, 1454, 1447, 1279, 1162, 1007.  $^1\text{H}$  NMR (400 MHz,  $\text{CDCl}_3$ )  $\delta$  9.42 (d,  $J = 4.0$  Hz, 1H), 9.25 (d,  $J = 3.2$  Hz, 1H), 7.88 (d,  $J = 7.2$  Hz, 2H), 7.54 (t,  $J = 7.2$  Hz, 1H), 7.43 (t,  $J = 7.6$  Hz, 2H), 7.34 - 6.95 (m, 9H), 3.39 (t,  $J = 11.2$  Hz, 1H), 3.21 – 2.97 (m, 3H), 2.88 (dd,  $J = 17.2, 7.6$  Hz, 1H), 2.81 – 2.62 (m, 2H), 2.30 (s, 3H), 2.19 (dt,  $J = 13.2, 3.2$  Hz, 1H), 1.60 (dd,  $J = 24.8, 12.0$  Hz, 1H).  $^{13}\text{C}$  NMR (101 MHz,  $\text{CDCl}_3$ )  $\delta$  203.4, 202.9, 198.2, 141.6, 138.8, 138.4, 136.7, 133.3, 129.2, 128.7, 128.6, 128.1, 128.0, 127.9, 127.9, 127.8, 124.3, 60.0, 59.8, 45.9, 45.0, 42.4, 39.6, 33.1, 21.4. The enantiomeric excess was determined by HPLC with an AD-H column after converted to corresponding ester **7t** with  $\text{Ph}_3\text{PCHCOOMe}$  (hexane: *i*-PrOH = 80:20), 1.0 mL/min; minor enantiomer  $t = 11.40$  min, major enantiomer  $t = 16.62$  min. HRMS (ESI) :  $[\text{M}+\text{H}]^+$  calcd for  $[\text{C}_{29}\text{H}_{29}\text{O}_3]$ : 425.2111 found: 425.2109.

## 5. X-ray crystallography of product **6d**

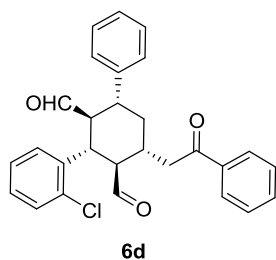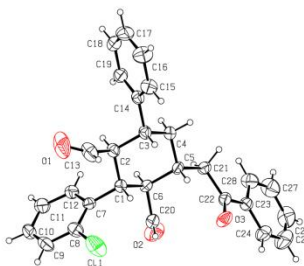

CCDC 1526972

Bond precision: C-C = 0.0059 Å Wavelength=0.71073

Cell: a=6.5747(5) b=16.8602(9) c=10.7211(7)  
 alpha=90 beta=93.733(7) gamma=90

Temperature: 293 K

|                                     | Calculated                                        | Reported                                          |
|-------------------------------------|---------------------------------------------------|---------------------------------------------------|
| Volume                              | 1185.92(14)                                       | 1185.93(14)                                       |
| Space group                         | P 21                                              | P 1 21 1                                          |
| Hall group                          | P 2yb                                             | P 2yb                                             |
| Moiety formula                      | C <sub>28</sub> H <sub>25</sub> Cl O <sub>3</sub> | C <sub>28</sub> H <sub>25</sub> Cl O <sub>3</sub> |
| Sum formula                         | C <sub>28</sub> H <sub>25</sub> Cl O <sub>3</sub> | C <sub>28</sub> H <sub>25</sub> Cl O <sub>3</sub> |
| Mr                                  | 444.93                                            | 444.93                                            |
| D <sub>x</sub> , g cm <sup>-3</sup> | 1.246                                             | 1.246                                             |
| Z                                   | 2                                                 | 2                                                 |
| Mu (mm <sup>-1</sup> )              | 0.188                                             | 0.188                                             |
| F <sub>000</sub>                    | 468.0                                             | 468.0                                             |
| F <sub>000</sub> '                  | 468.50                                            |                                                   |
| h,k,lmax                            | 8,20,13                                           | 8,20,13                                           |
| N <sub>ref</sub>                    | 4650[ 2409]                                       | 4371                                              |
| T <sub>min</sub> , T <sub>max</sub> |                                                   | 0.616, 1.000                                      |
| T <sub>min</sub> '                  |                                                   |                                                   |

Correction method= # Reported T Limits: T<sub>min</sub>=0.616 T<sub>max</sub>=1.000 AbsCorr = MULTI-SCAN

Data completeness= 1.81/0.94

Theta(max)= 26.020

R(reflections)= 0.0558( 2772)

wR<sub>2</sub>(reflections)= 0.1261( 4371)

S = 1.034

N<sub>par</sub>= 289

Displacement ellipsoids are drawn at 30% probability level



$^1\text{H}$  NMR of **5a** (400M,  $\text{CDCl}_3$ )

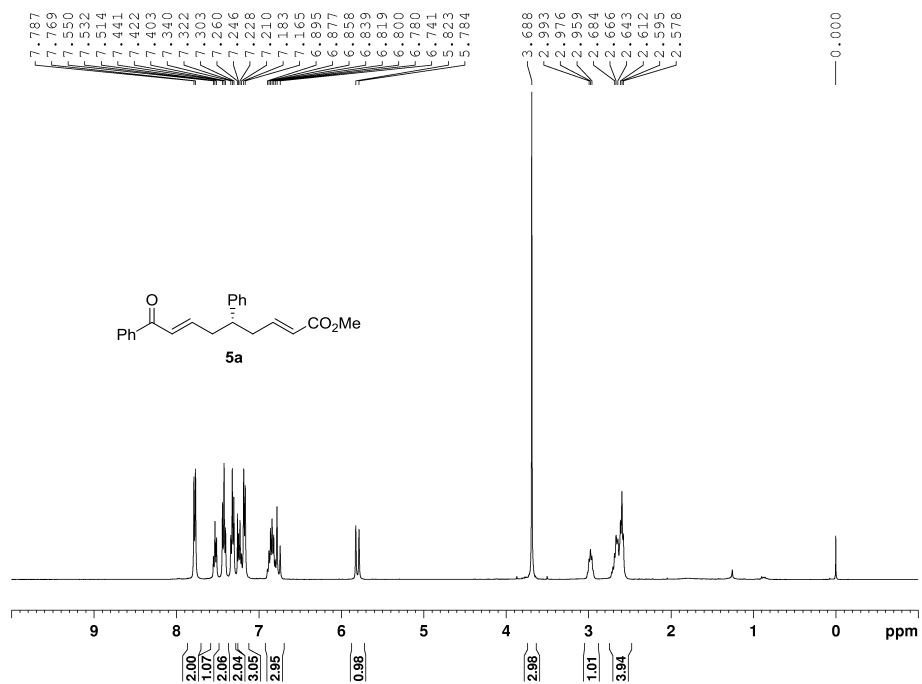

$^{13}\text{C}$  NMR of **5a** (101M,  $\text{CDCl}_3$ )

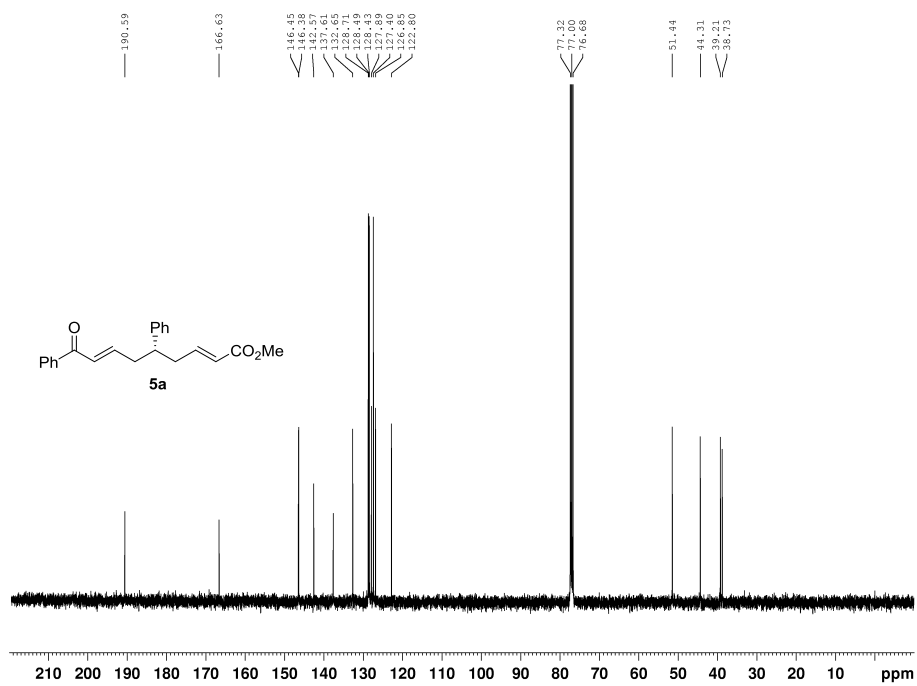

$^1\text{H}$  NMR of **5b** (400M,  $\text{CDCl}_3$ )

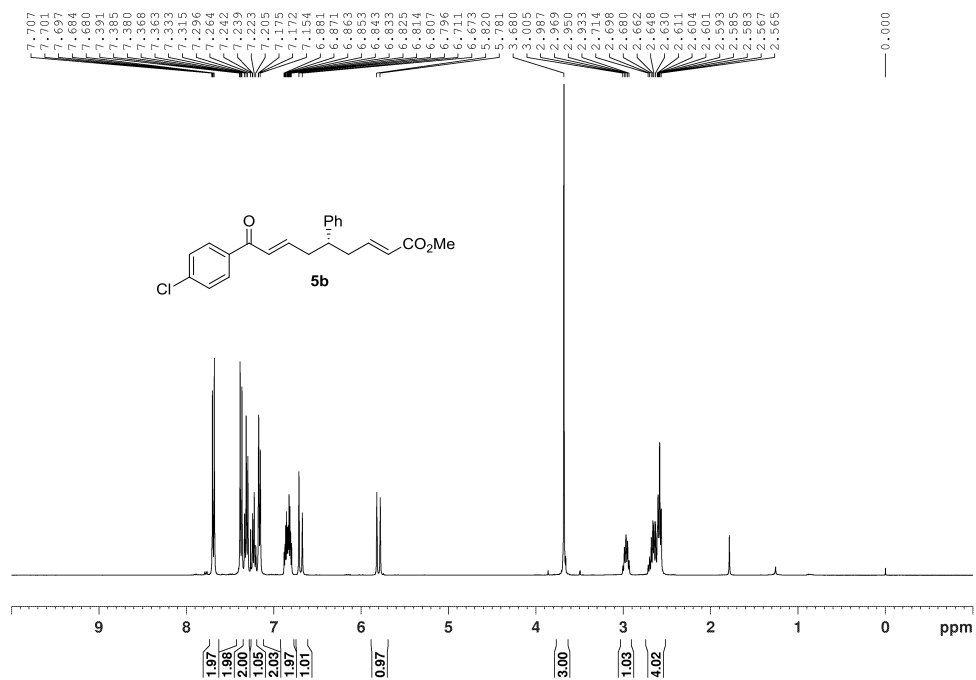

$^{13}\text{C}$  NMR of **5b** (101M,  $\text{CDCl}_3$ )

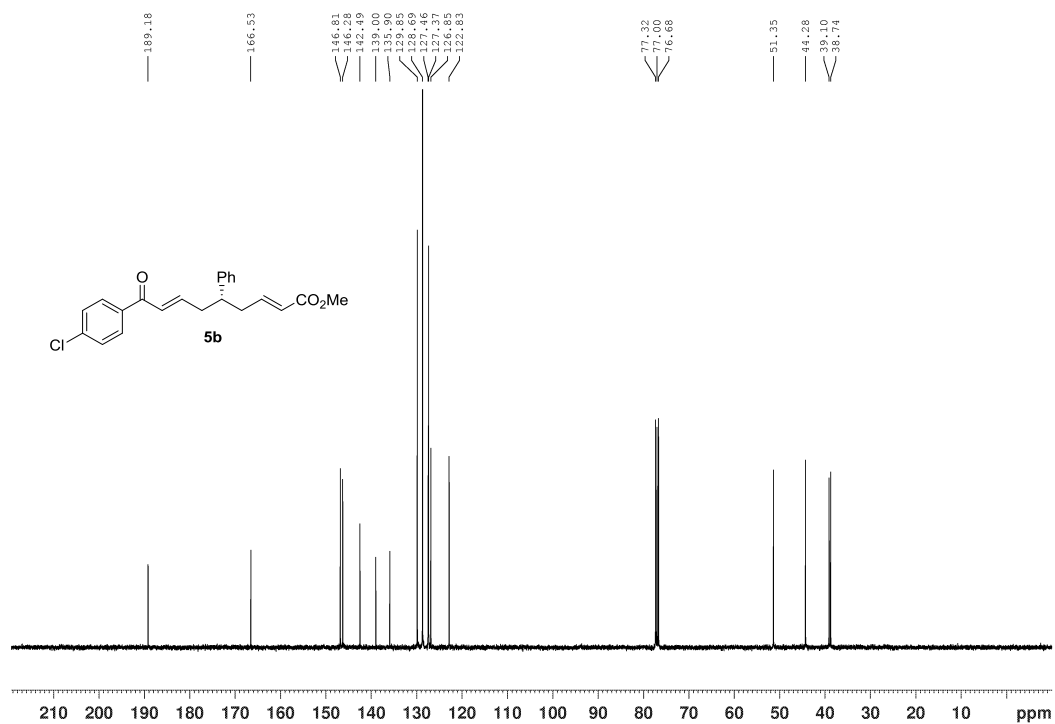

$^1\text{H}$  NMR of **5c** (400M,  $\text{CDCl}_3$ )

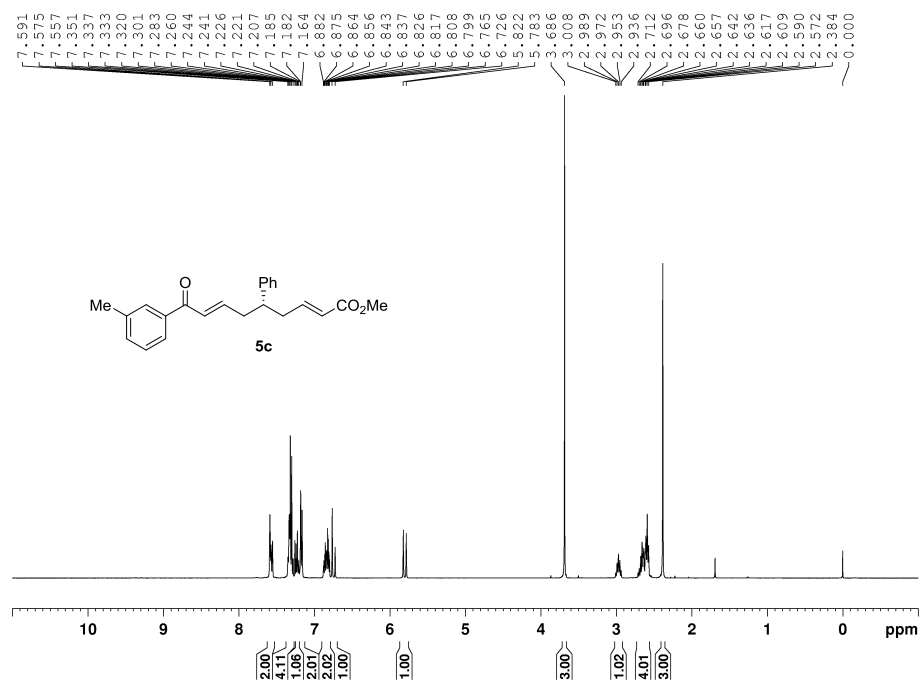

$^{13}\text{C}$  NMR of **5c** (101M,  $\text{CDCl}_3$ )

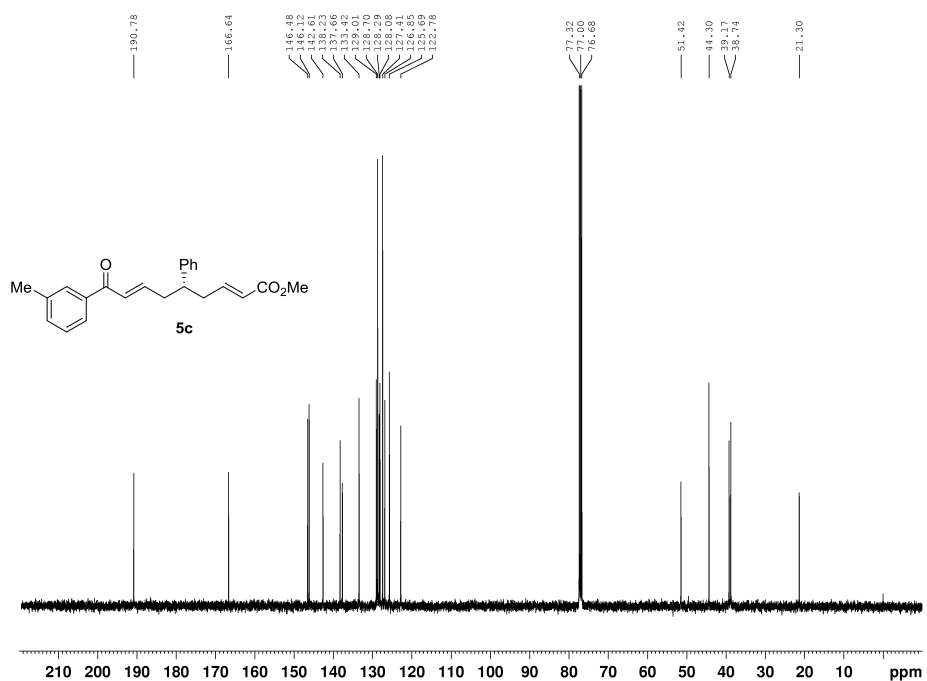

$^1\text{H}$  NMR of **5d** (400M,  $\text{CDCl}_3$ )

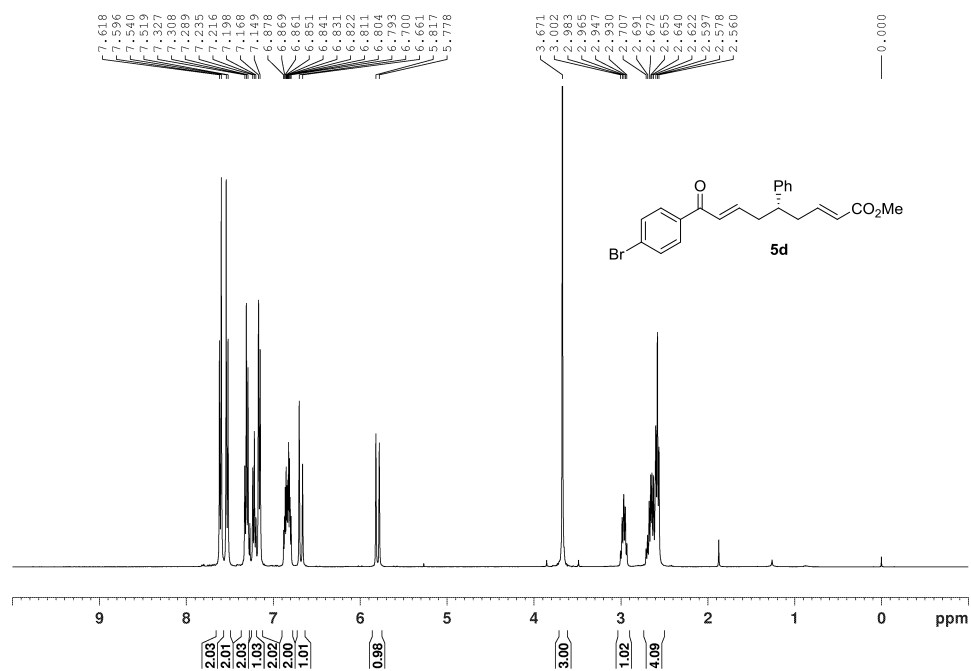

$^{13}\text{C}$  NMR of **5d** (101M,  $\text{CDCl}_3$ )

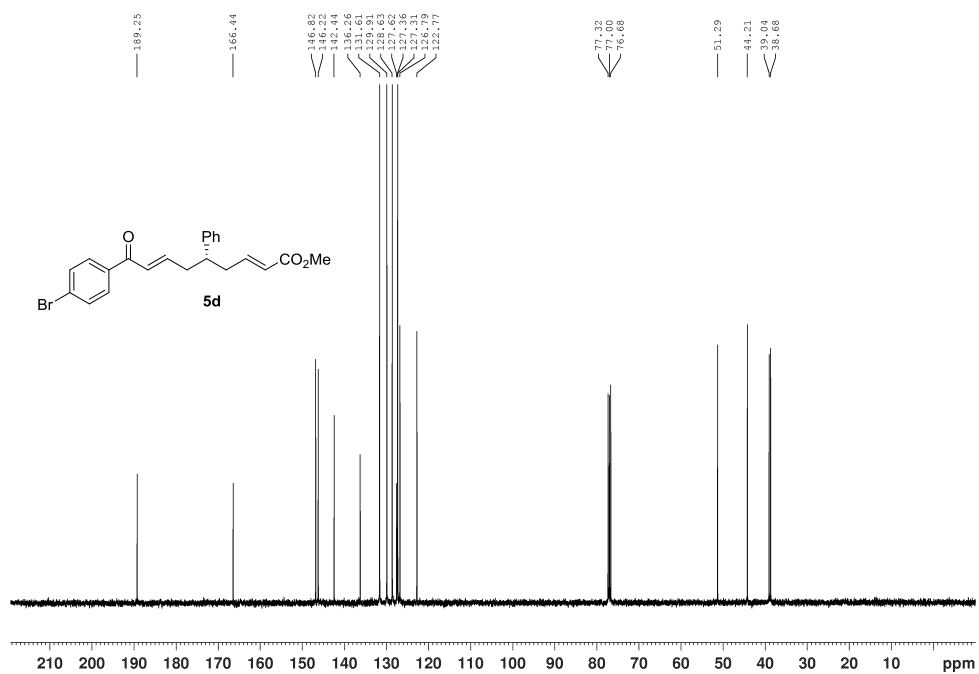

$^1\text{H}$  NMR of **5e** (400M,  $\text{CDCl}_3$ )

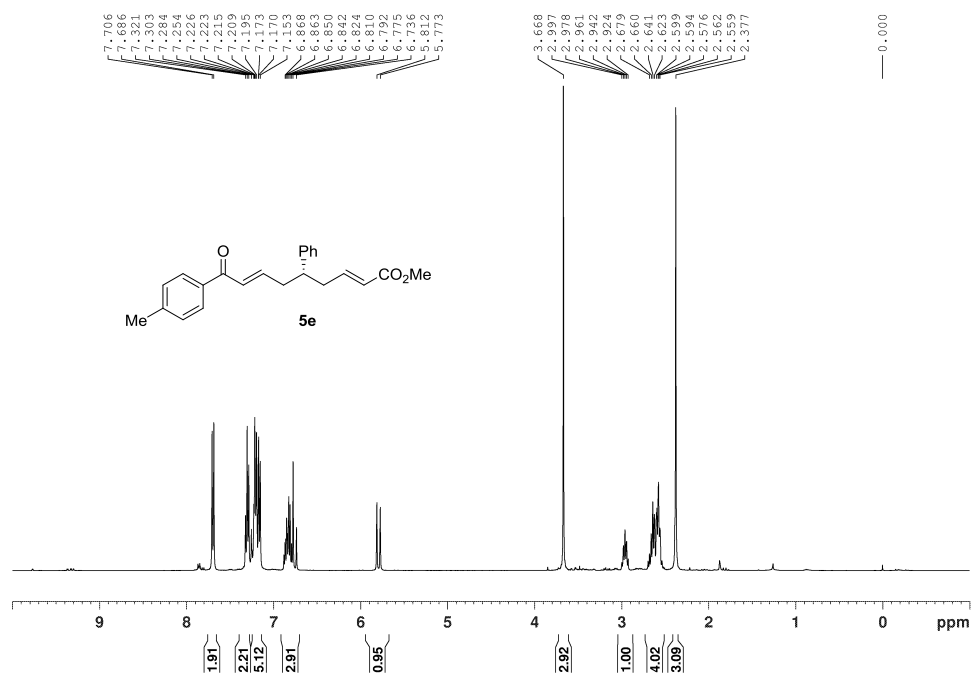

$^{13}\text{C}$  NMR of **5e** (101M,  $\text{CDCl}_3$ )

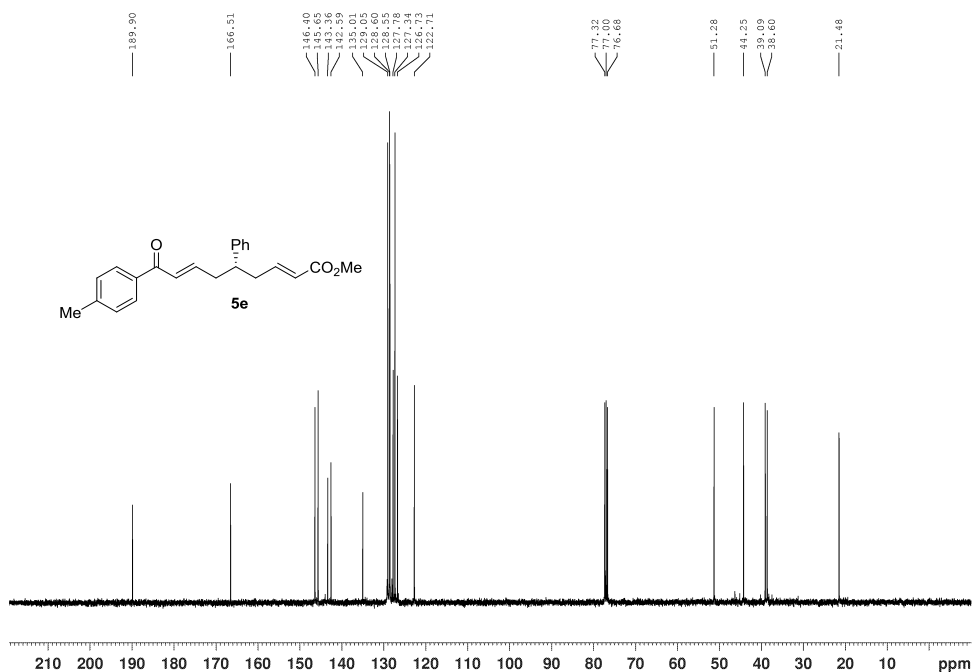

$^1\text{H}$  NMR of **5f** (400M,  $\text{CDCl}_3$ )

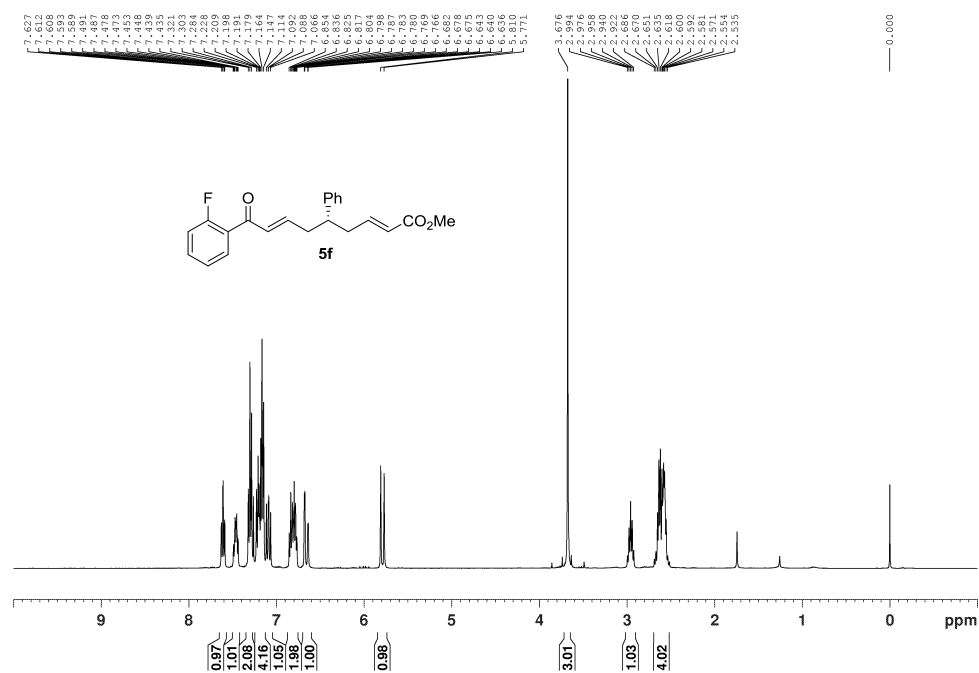

$^{13}\text{C}$  NMR of **5f** (101M,  $\text{CDCl}_3$ )

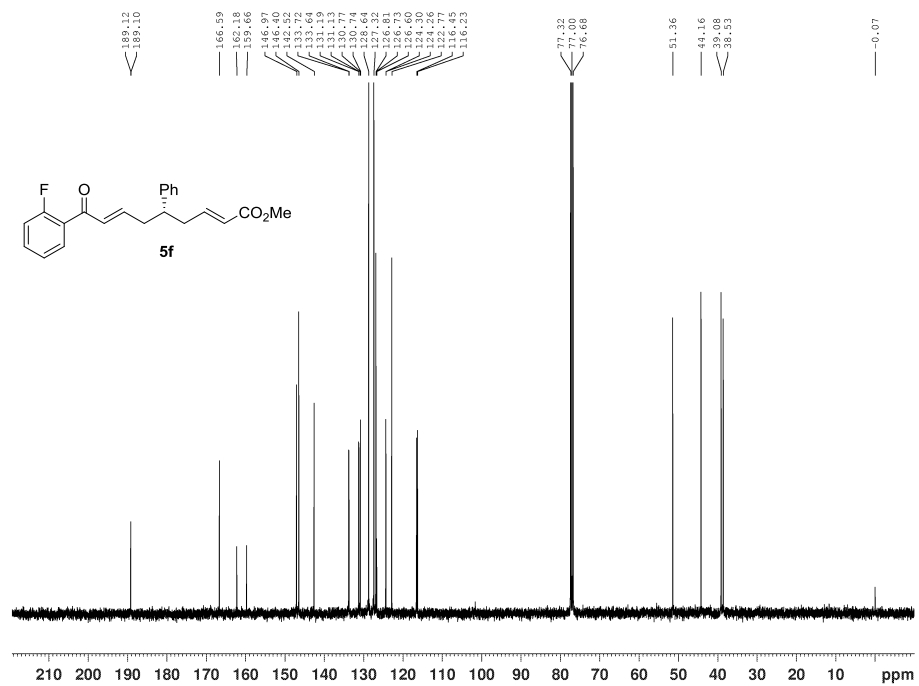

$^1\text{H}$  NMR of **5g** (400M,  $\text{CDCl}_3$ )

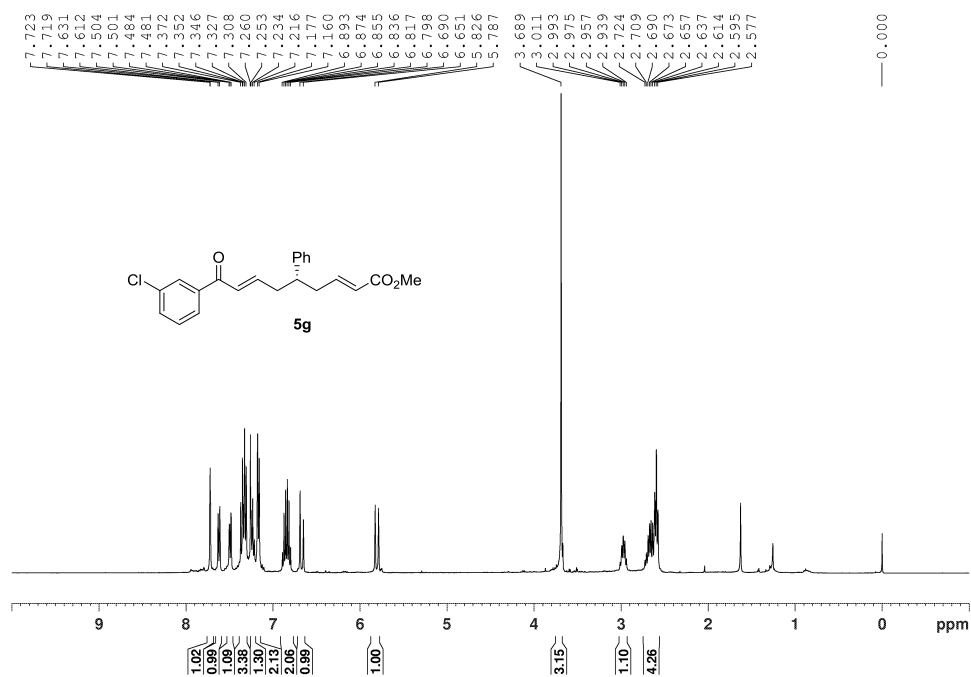

$^{13}\text{C}$  NMR of **5g** (101M,  $\text{CDCl}_3$ )

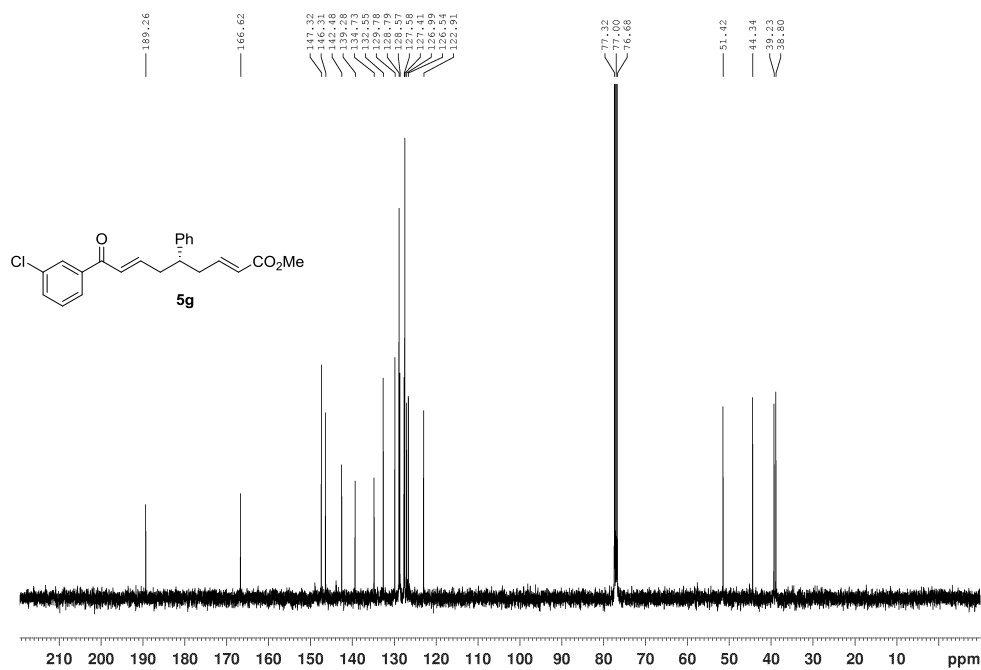

$^1\text{H}$  NMR of **5h** (400M,  $\text{CDCl}_3$ )

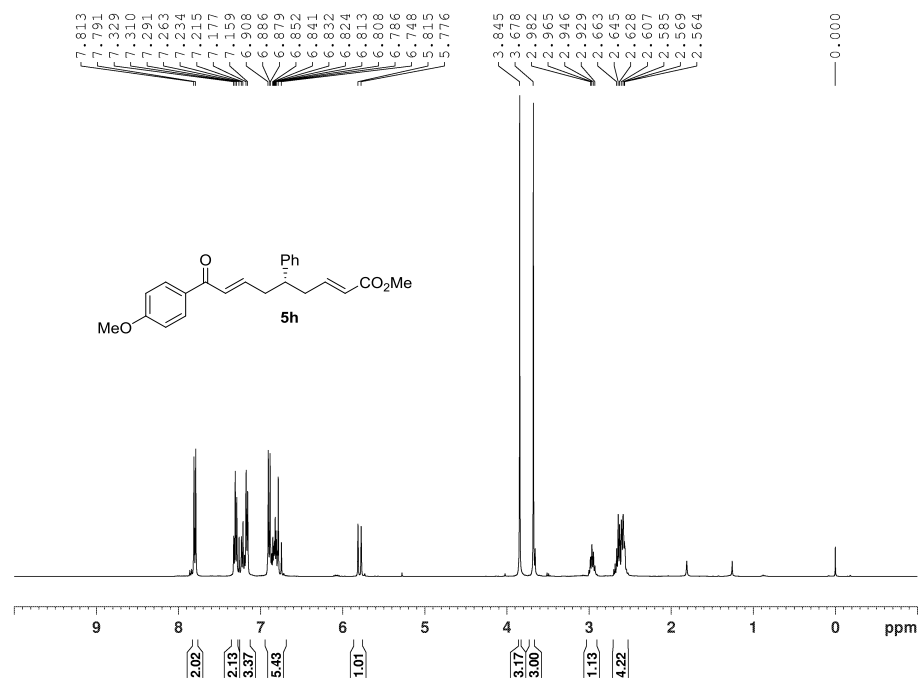

$^{13}\text{C}$  NMR of **5h** (101M,  $\text{CDCl}_3$ )

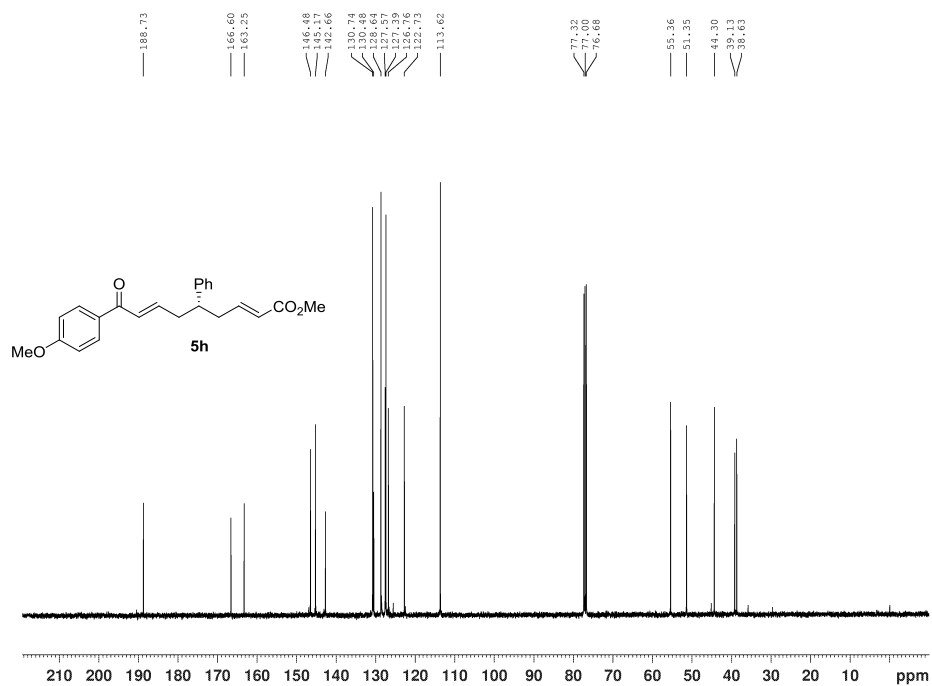



$^1\text{H}$  NMR of **5i** (400M,  $\text{CDCl}_3$ )

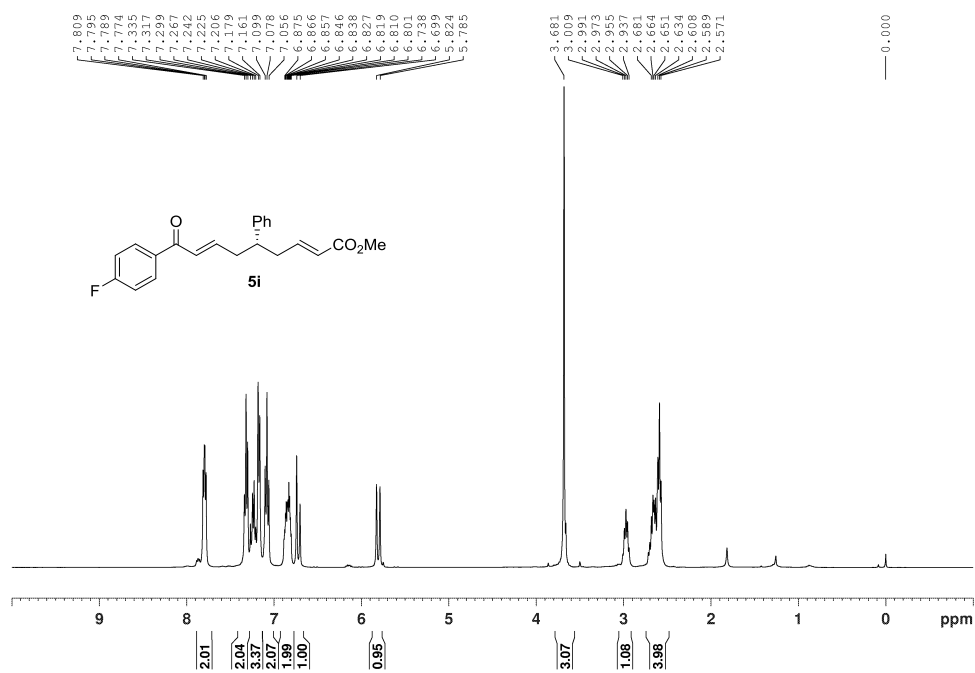

$^{13}\text{C}$  NMR of **5i** (101M,  $\text{CDCl}_3$ )

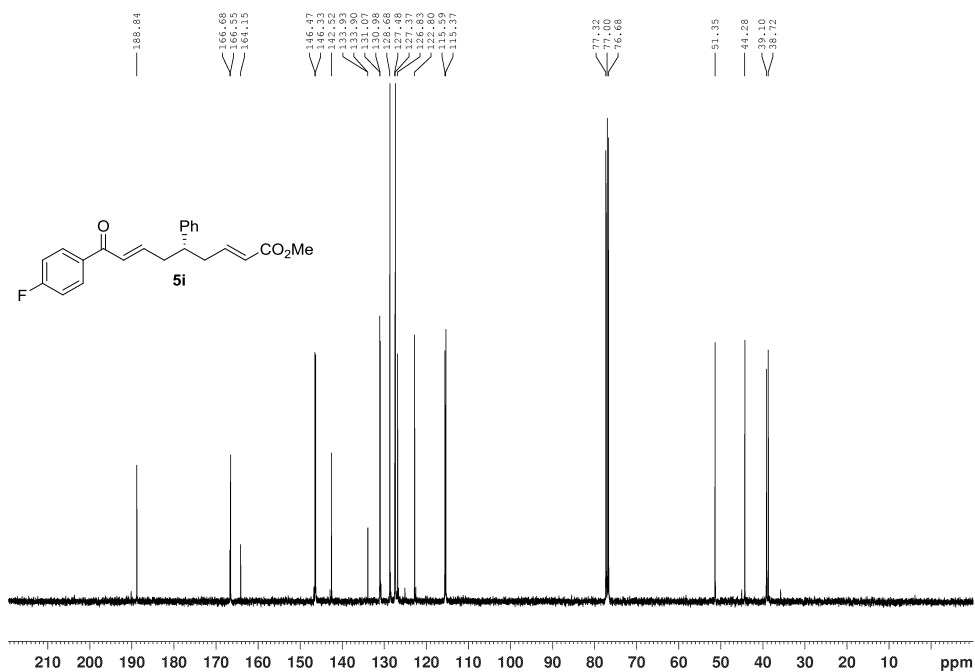

$^1\text{H}$  NMR of **5j** (400M,  $\text{CDCl}_3$ )

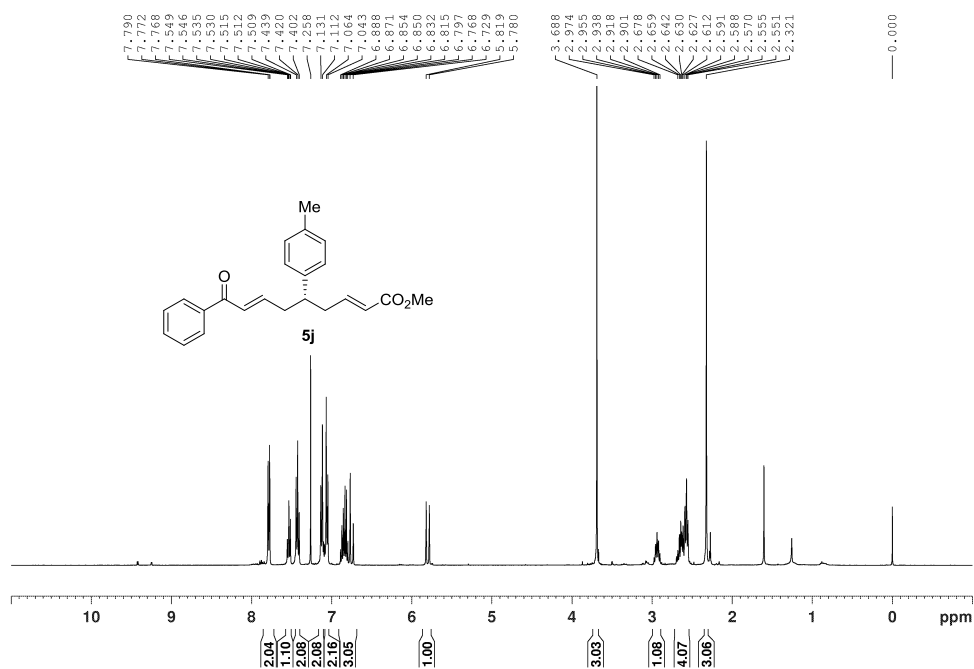

$^{13}\text{C}$  NMR of **5j** (101M,  $\text{CDCl}_3$ )

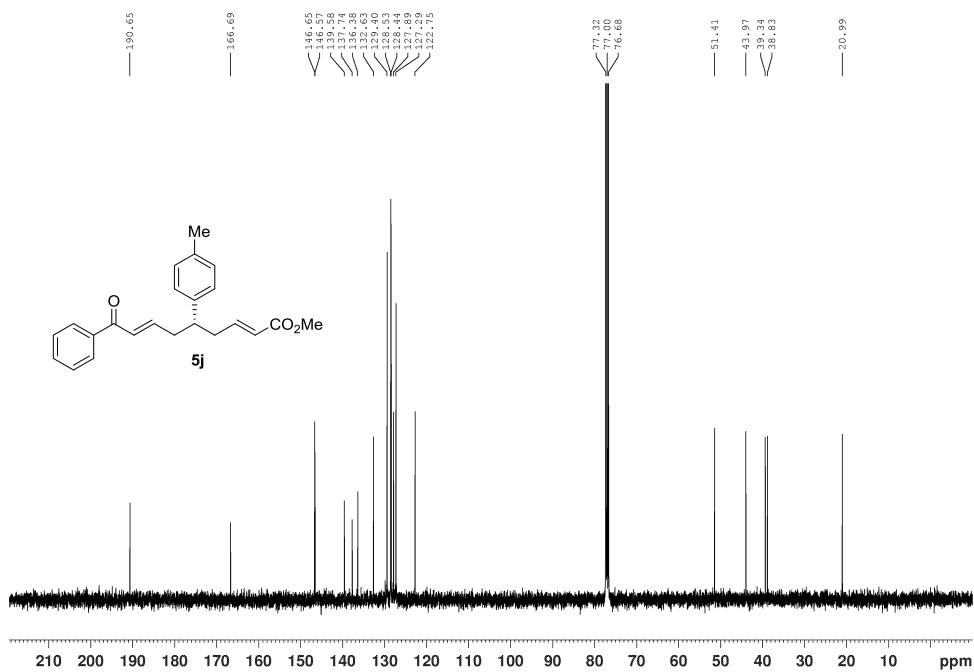

$^1\text{H}$  NMR of **5k** (400M,  $\text{CDCl}_3$ )

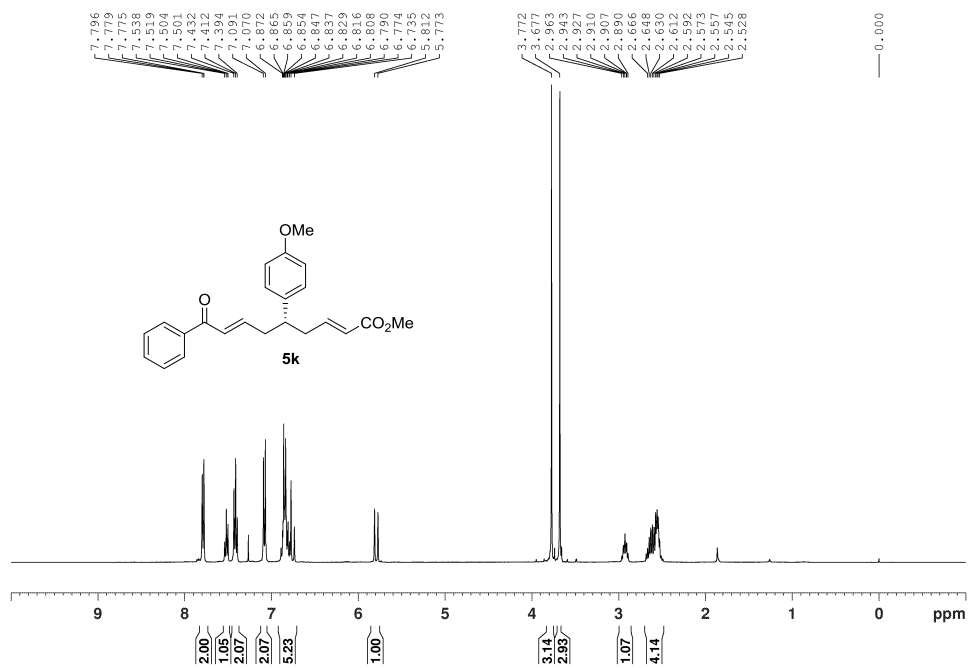

$^{13}\text{C}$  NMR of **5k** (101M,  $\text{CDCl}_3$ )

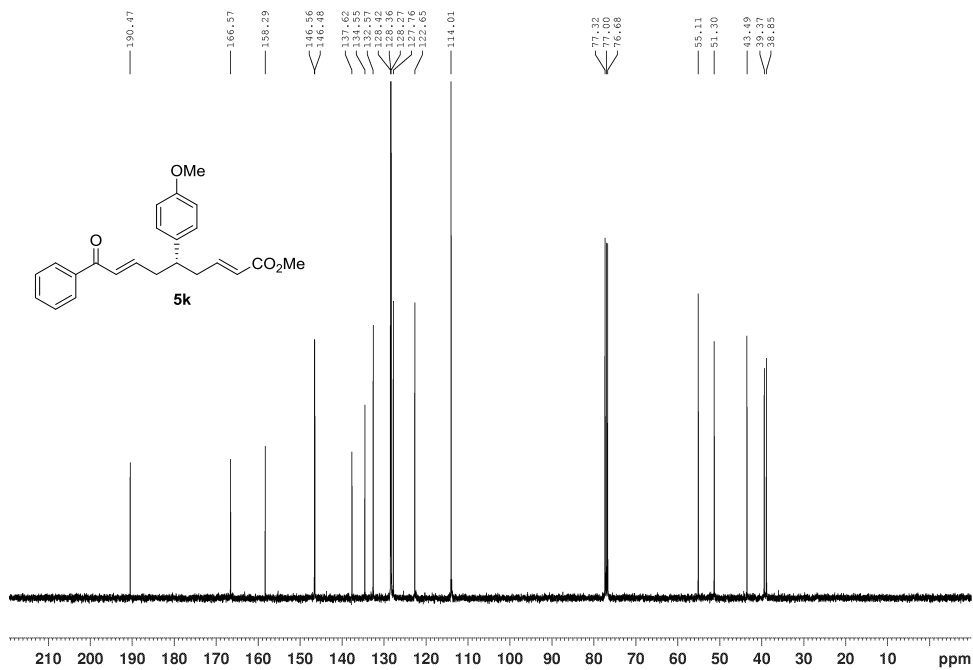

$^1\text{H}$  NMR of **51** (400M,  $\text{CDCl}_3$ )

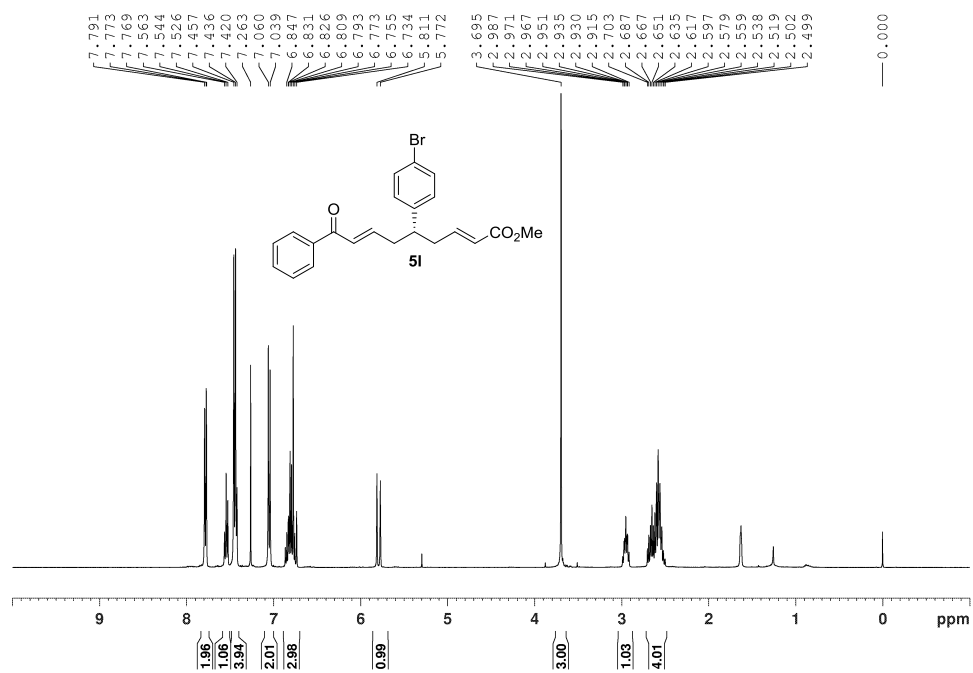

$^{13}\text{C}$  NMR of **51** (101M,  $\text{CDCl}_3$ )

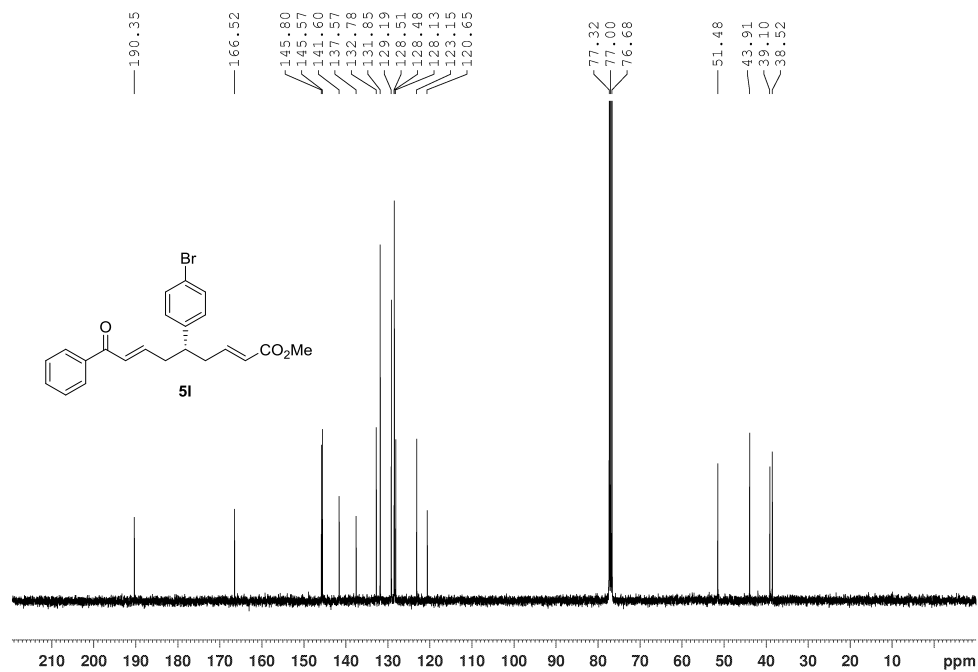

<sup>1</sup>H NMR of **5m** (400M, CDCl<sub>3</sub>)

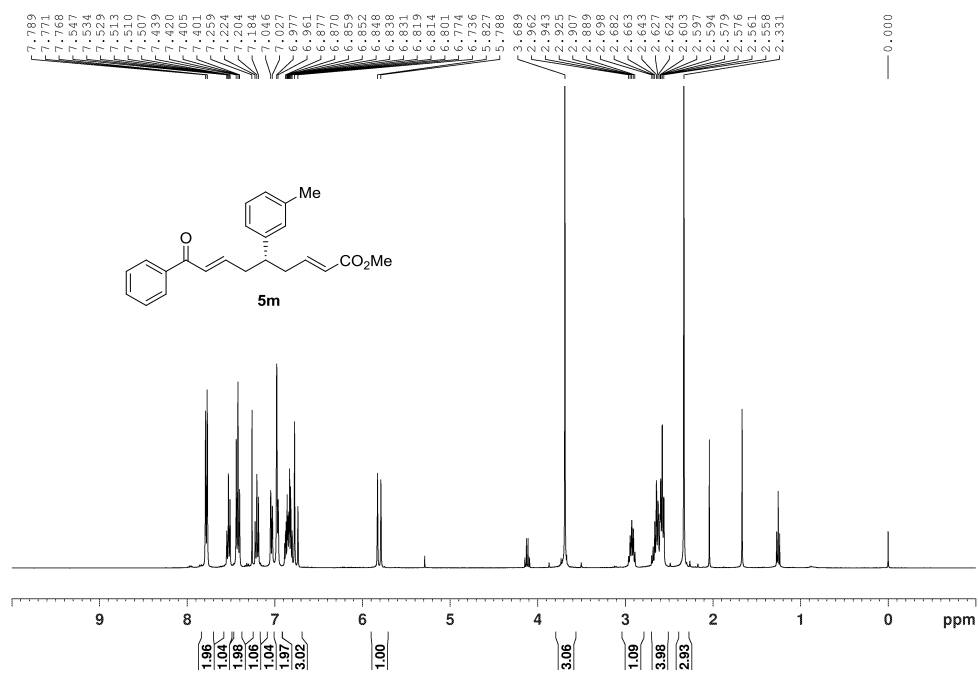

<sup>13</sup>C NMR of **5m** (101M, CDCl<sub>3</sub>)

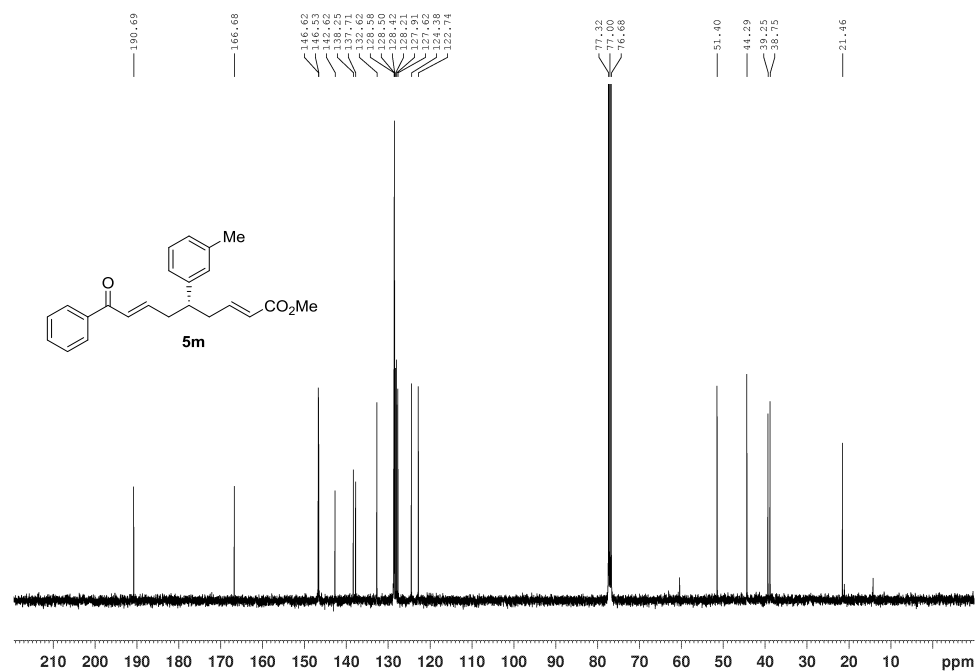



$^1\text{H}$  NMR of **6b** (400M,  $\text{CDCl}_3$ )

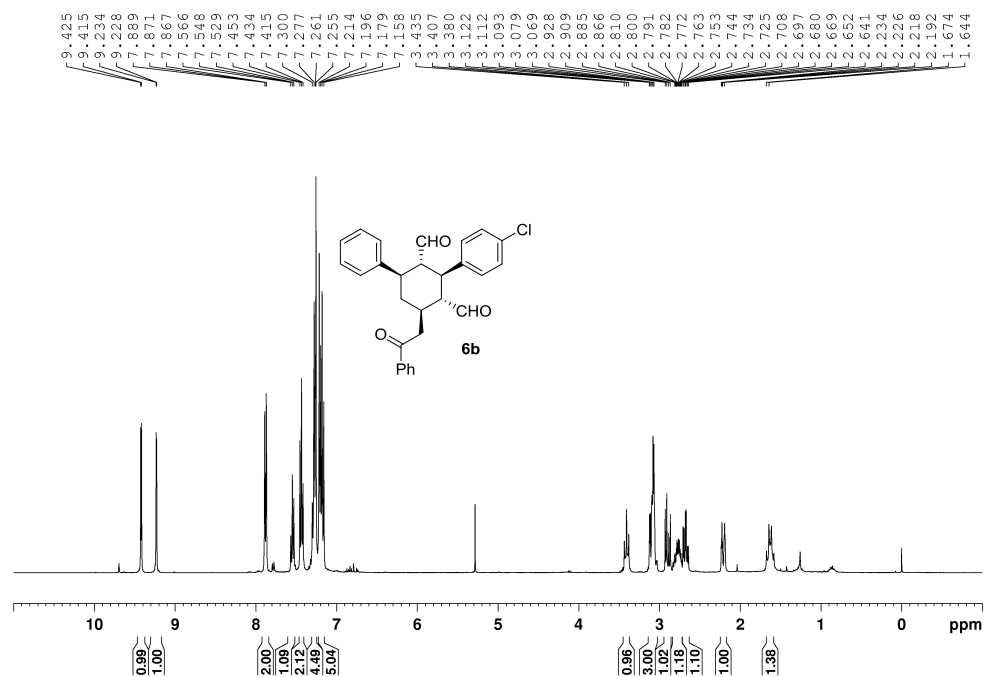

$^{13}\text{C}$  NMR of **6b** (101M,  $\text{CDCl}_3$ )

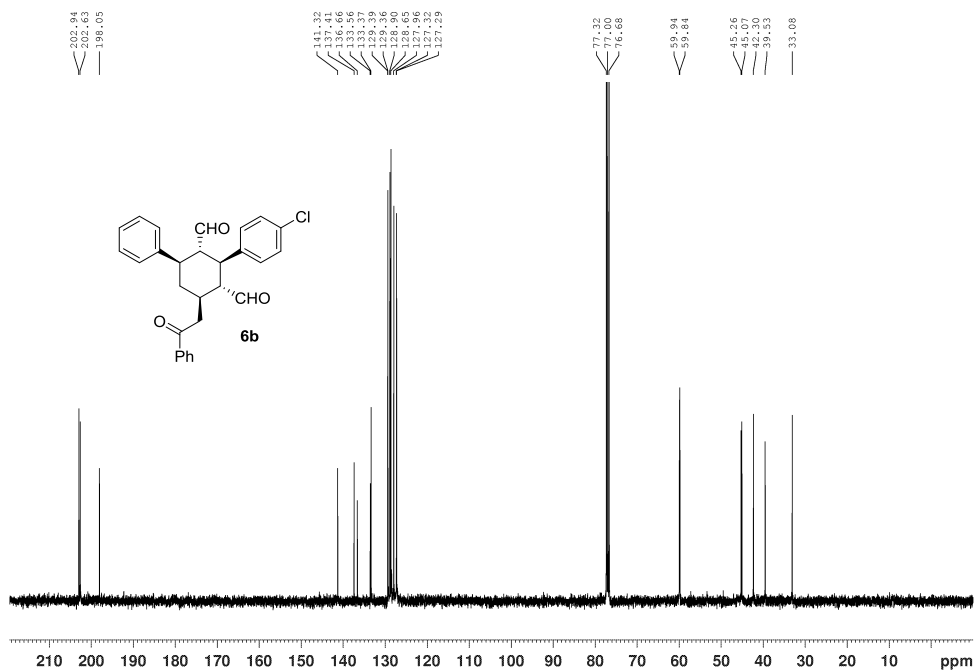

$^1\text{H}$  NMR of **6c** (400M,  $\text{CDCl}_3$ )

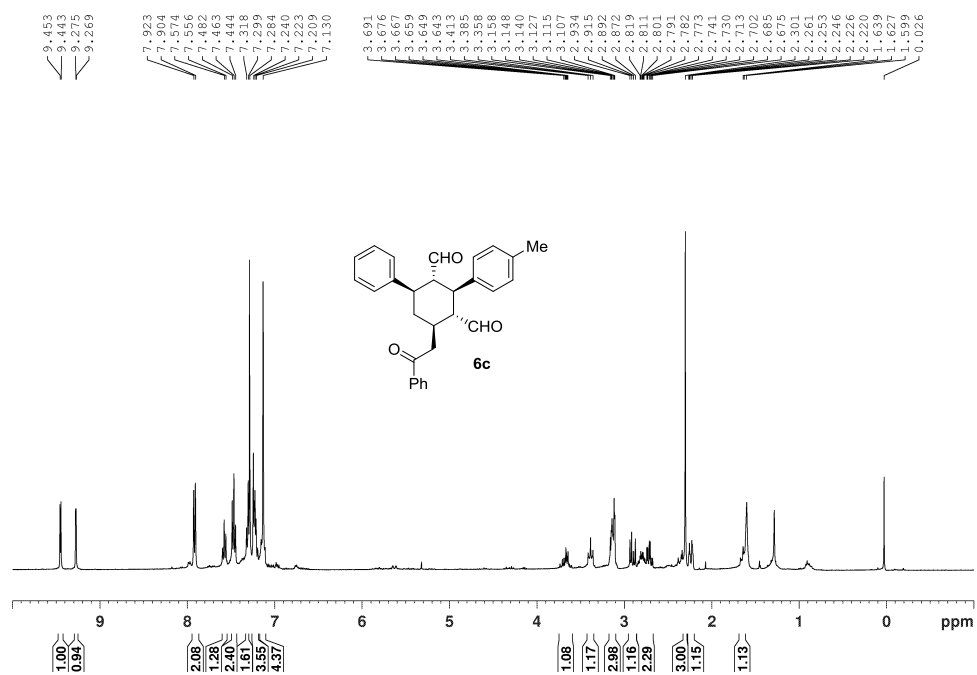

$^{13}\text{C}$  NMR of **6c** (101M,  $\text{CDCl}_3$ )

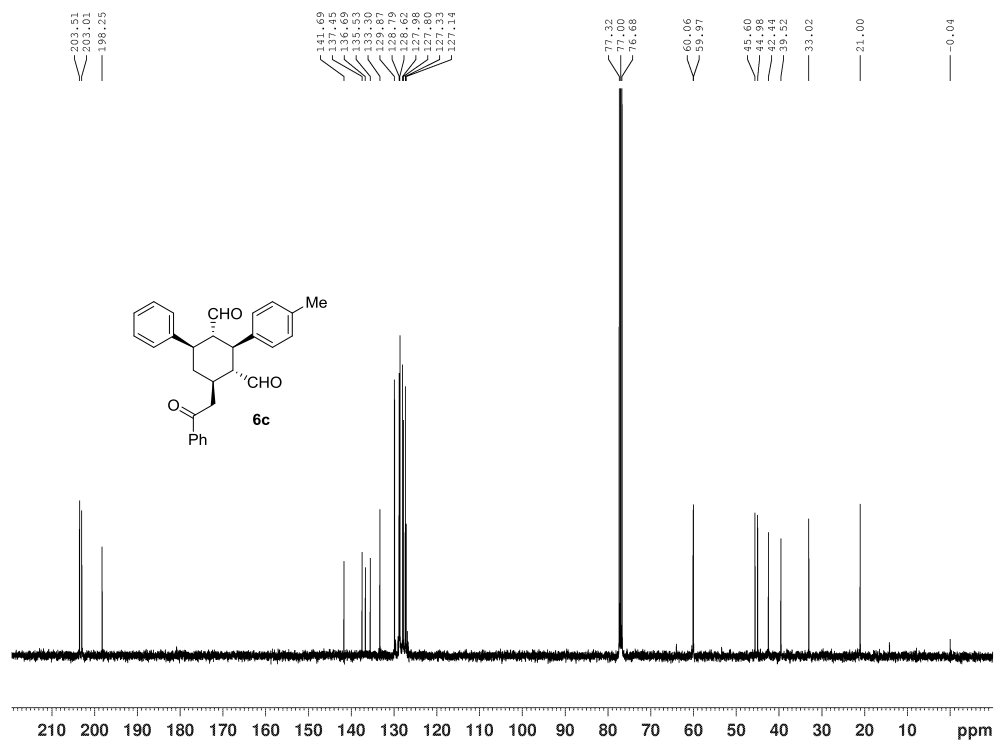



$^1\text{H}$  NMR of **6d** (400M,  $\text{CDCl}_3$ )

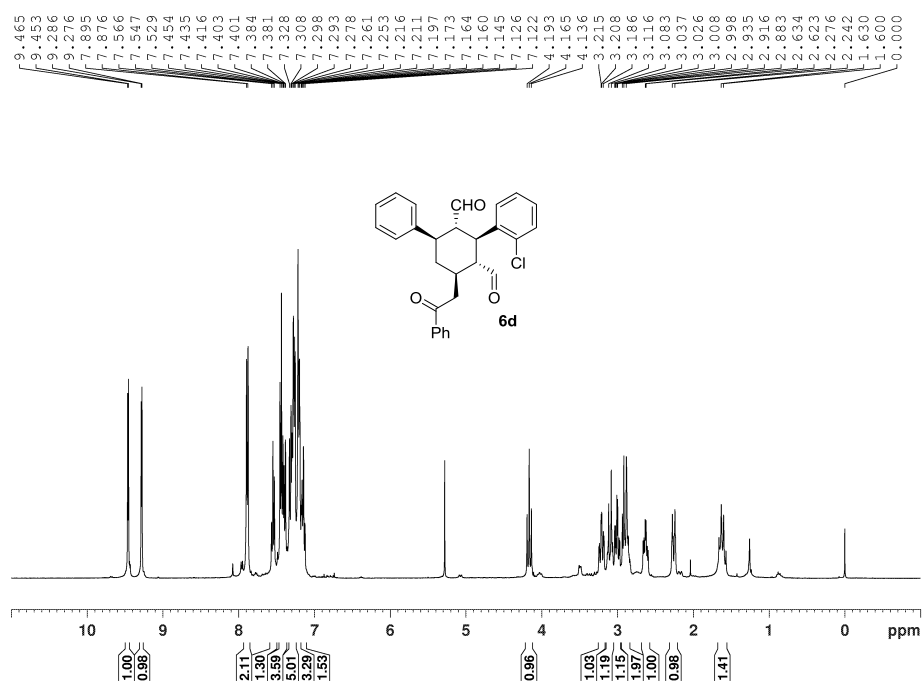

$^{13}\text{C}$  NMR of **6d** (101M,  $\text{CDCl}_3$ )

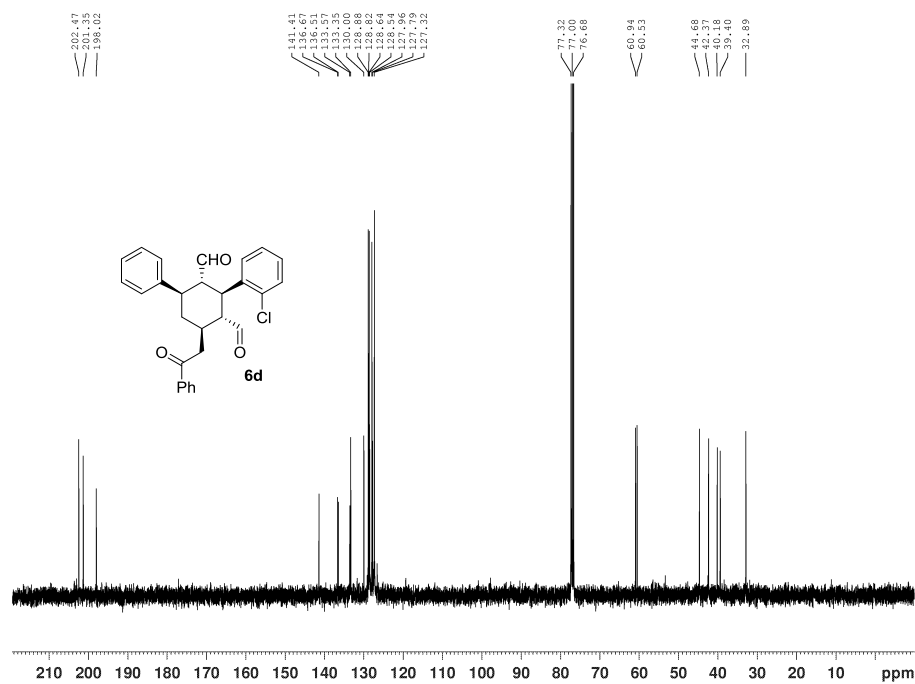

$^1\text{H}$  NMR of **6e** (400M,  $\text{CDCl}_3$ )

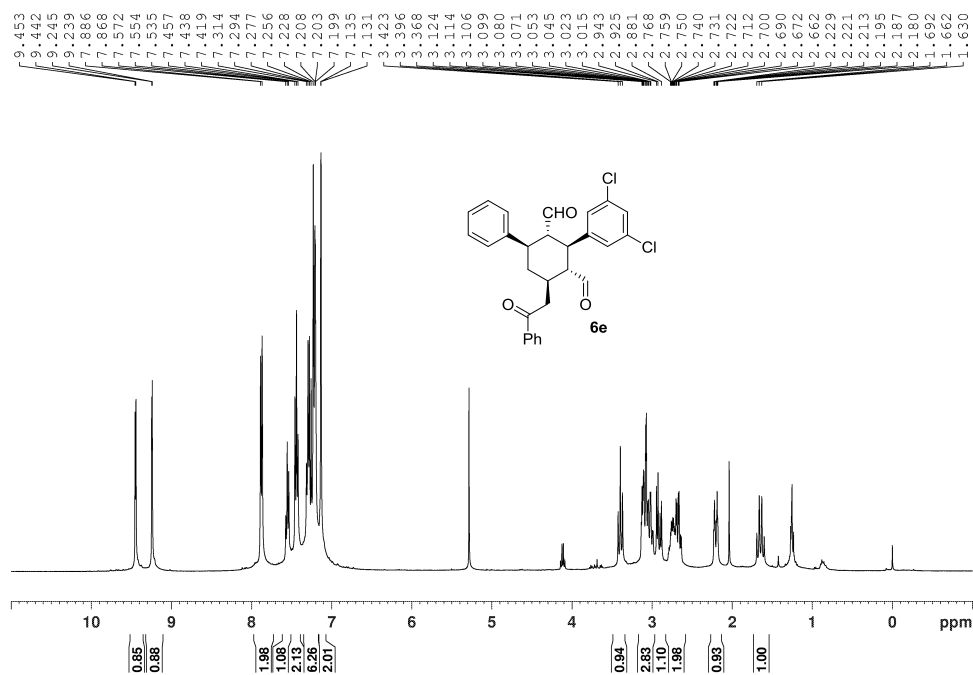

$^{13}\text{C}$  NMR of **6e** (101M,  $\text{CDCl}_3$ )

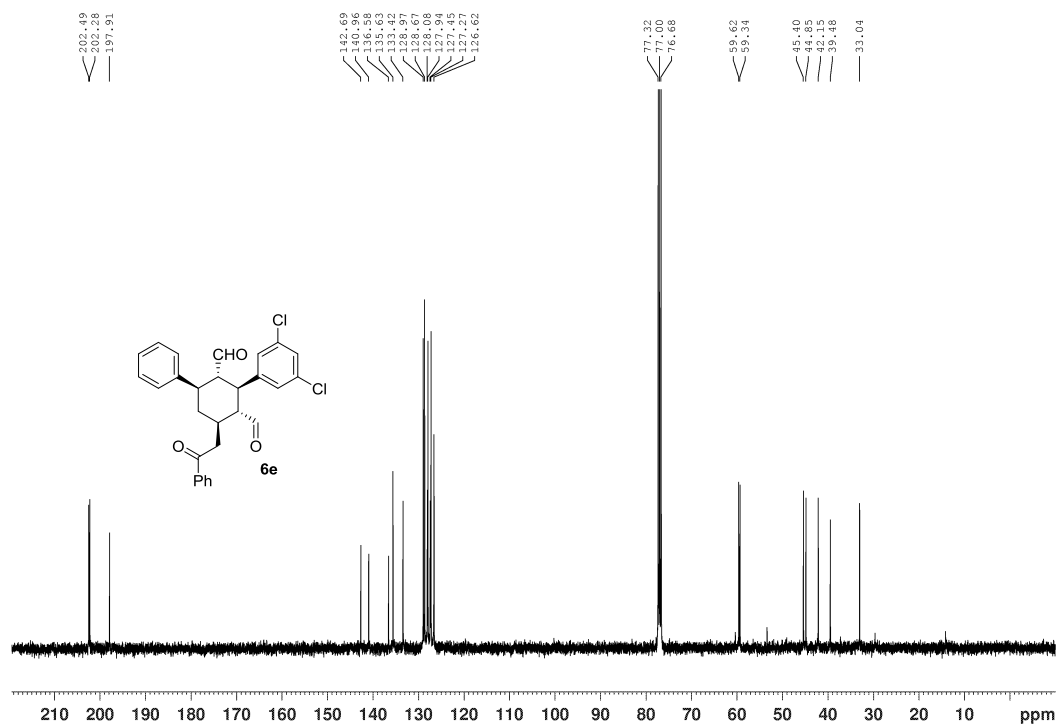

$^1\text{H}$  NMR of **6f** (400M,  $\text{CDCl}_3$ )

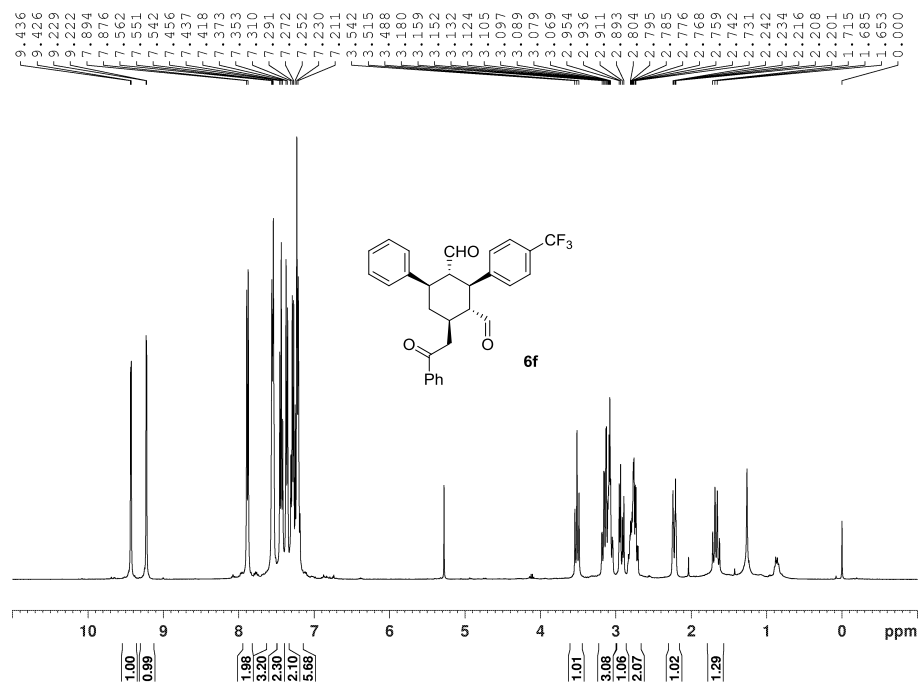

$^{13}\text{C}$  NMR of **6f** (101M,  $\text{CDCl}_3$ )

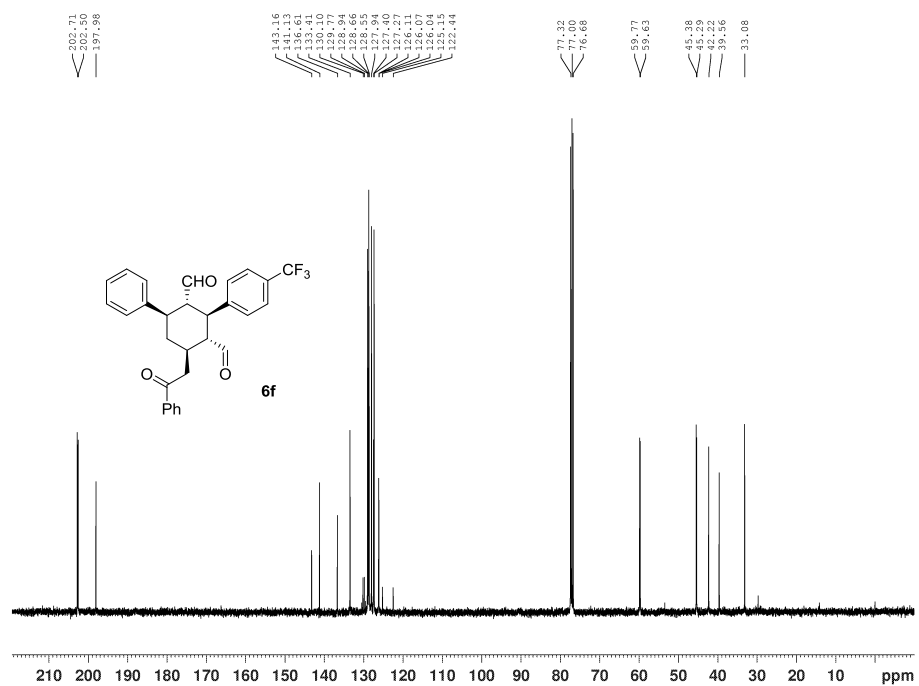

$^1\text{H}$  NMR of **6g** (400M,  $\text{CDCl}_3$ )

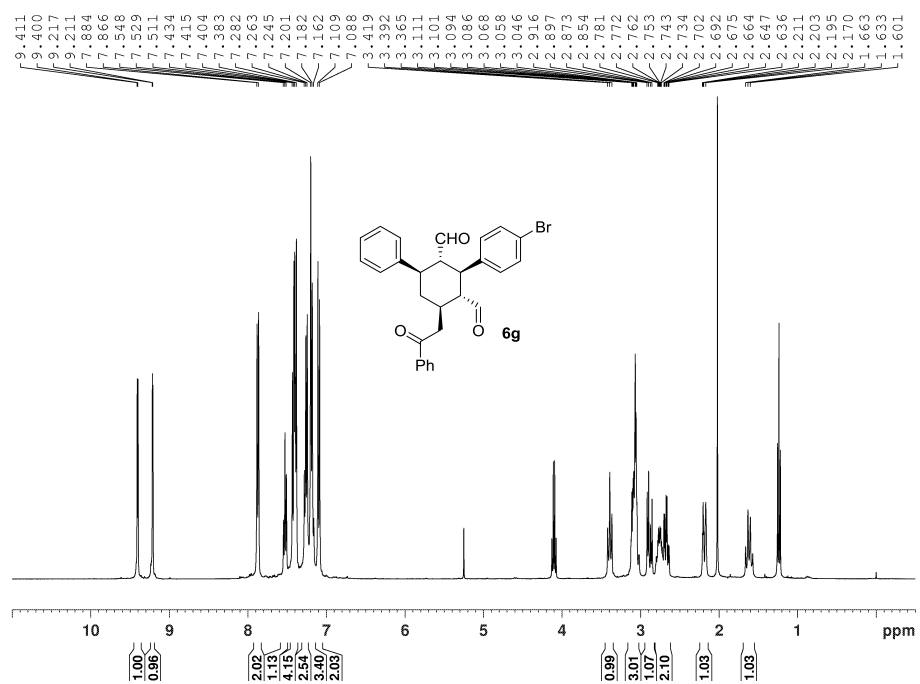

$^{13}\text{C}$  NMR of **6g** (101M,  $\text{CDCl}_3$ )

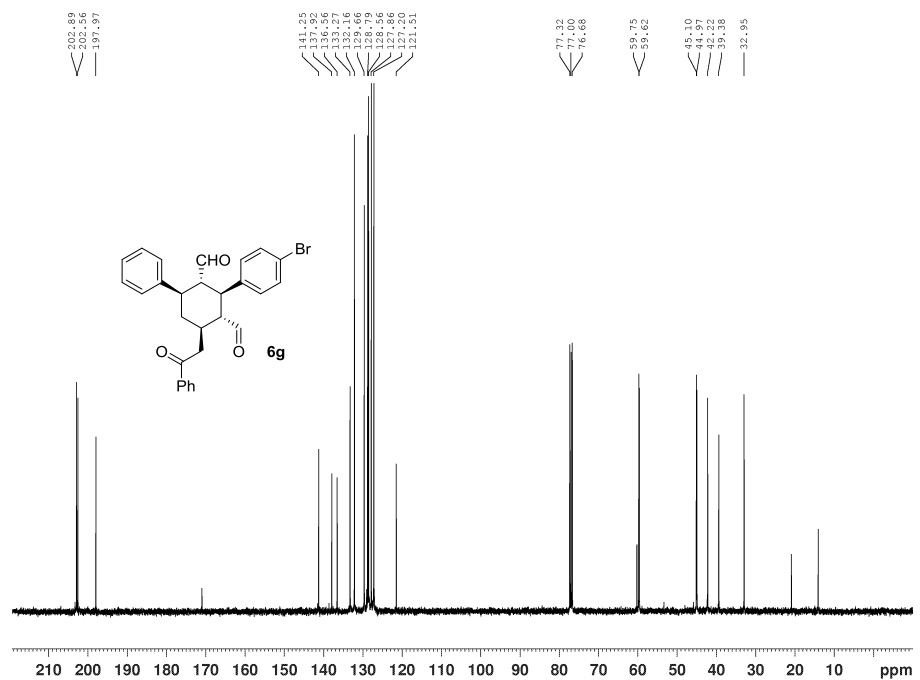

<sup>1</sup>H NMR of **6h** (400M, CDCl<sub>3</sub>)

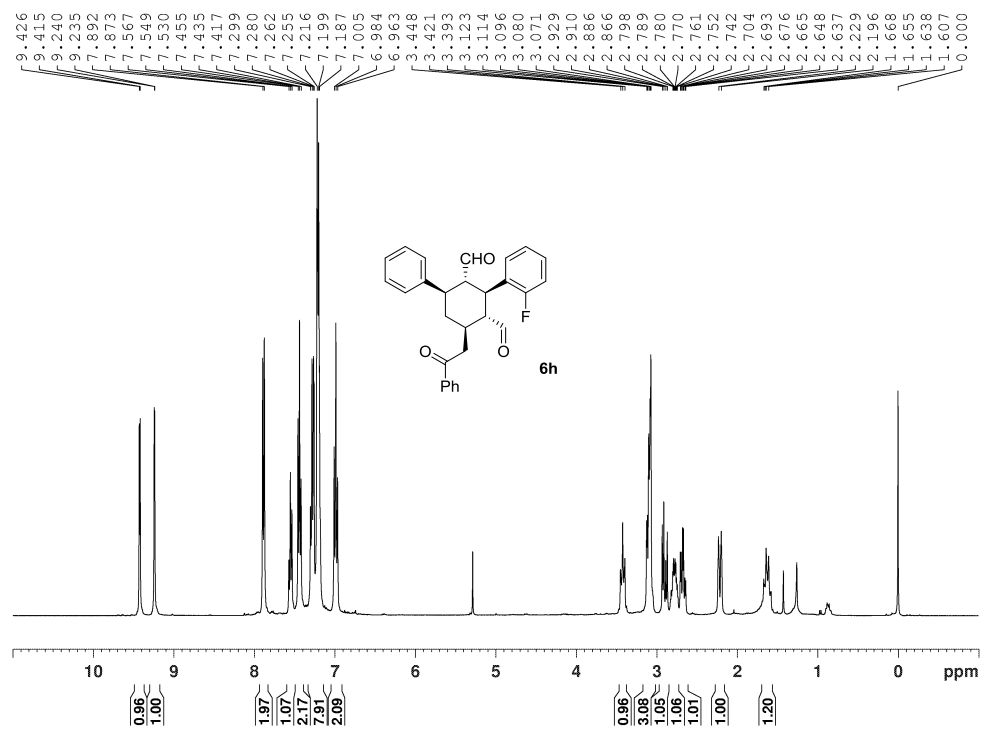

<sup>13</sup>C NMR of **6h** (101M, CDCl<sub>3</sub>)

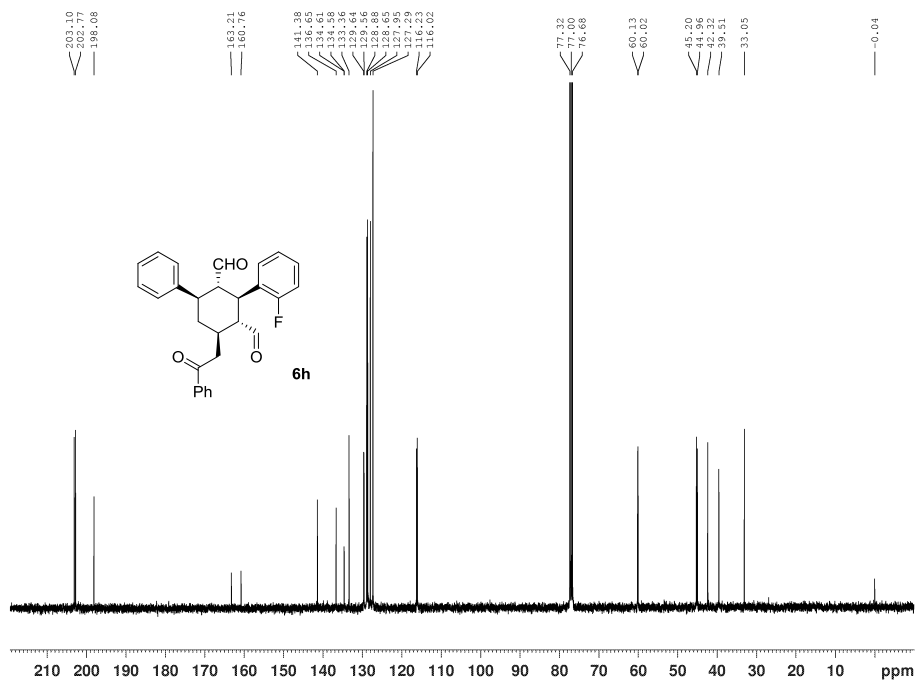

$^1\text{H}$  NMR of **6i** (400M,  $\text{CDCl}_3$ )

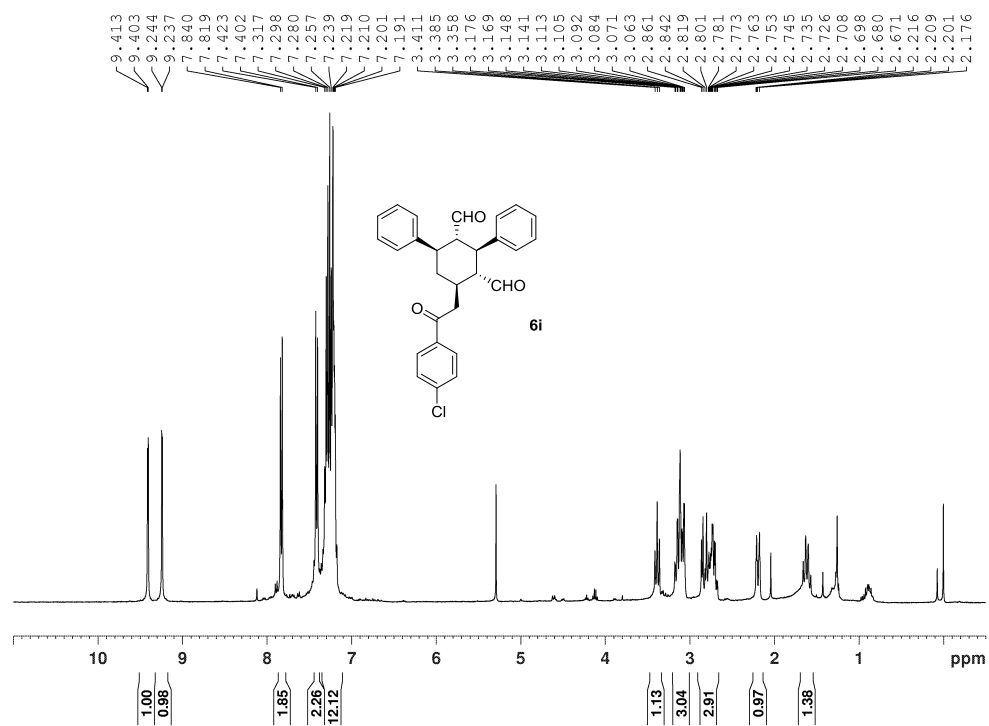

$^{13}\text{C}$  NMR of **6i** (101M,  $\text{CDCl}_3$ )

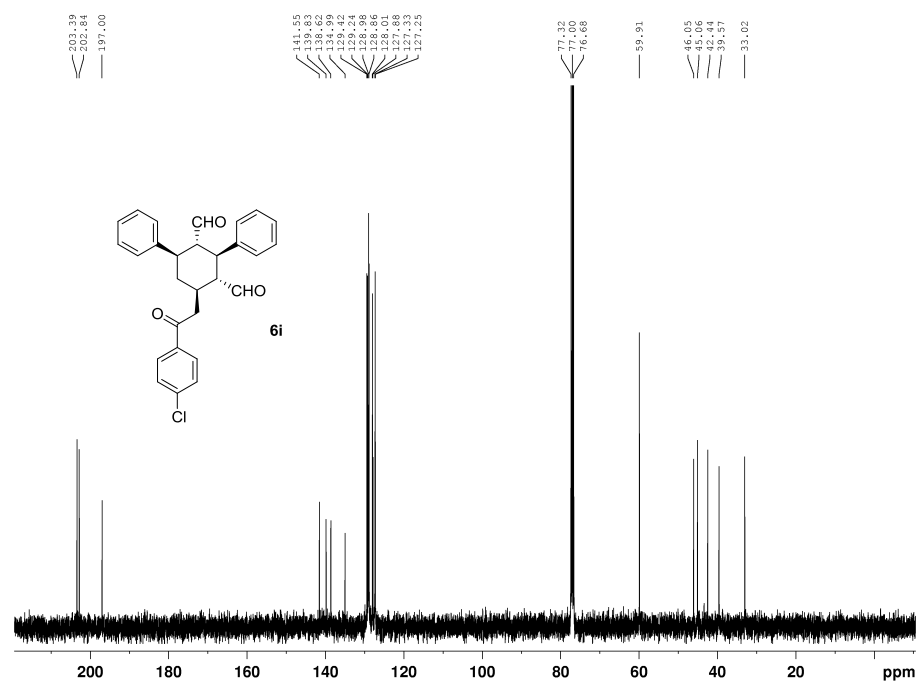

$^1\text{H}$  NMR of **6j** (400M,  $\text{CDCl}_3$ )

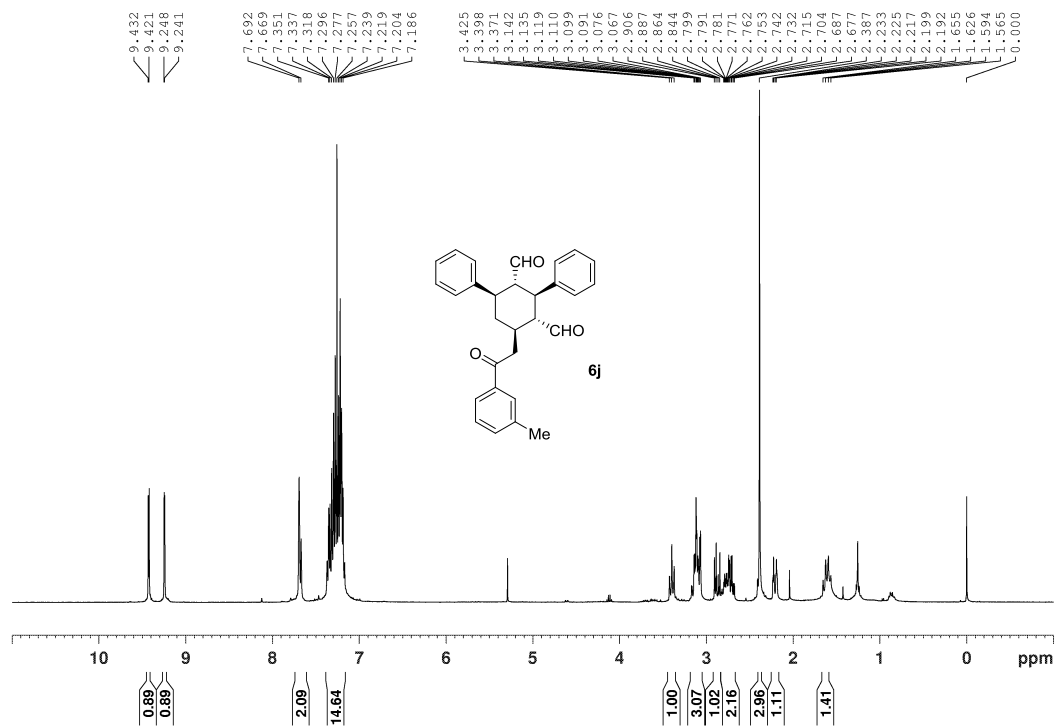

$^{13}\text{C}$  NMR of **6j** (101M,  $\text{CDCl}_3$ )

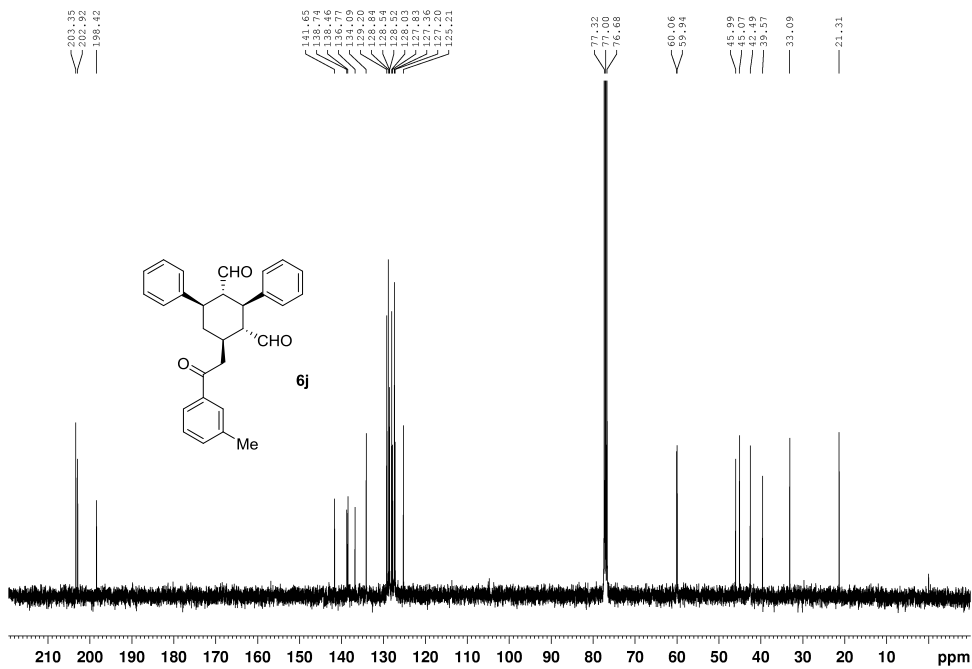

<sup>1</sup>H NMR of **6k** (400M, DMSO-d<sub>6</sub>)

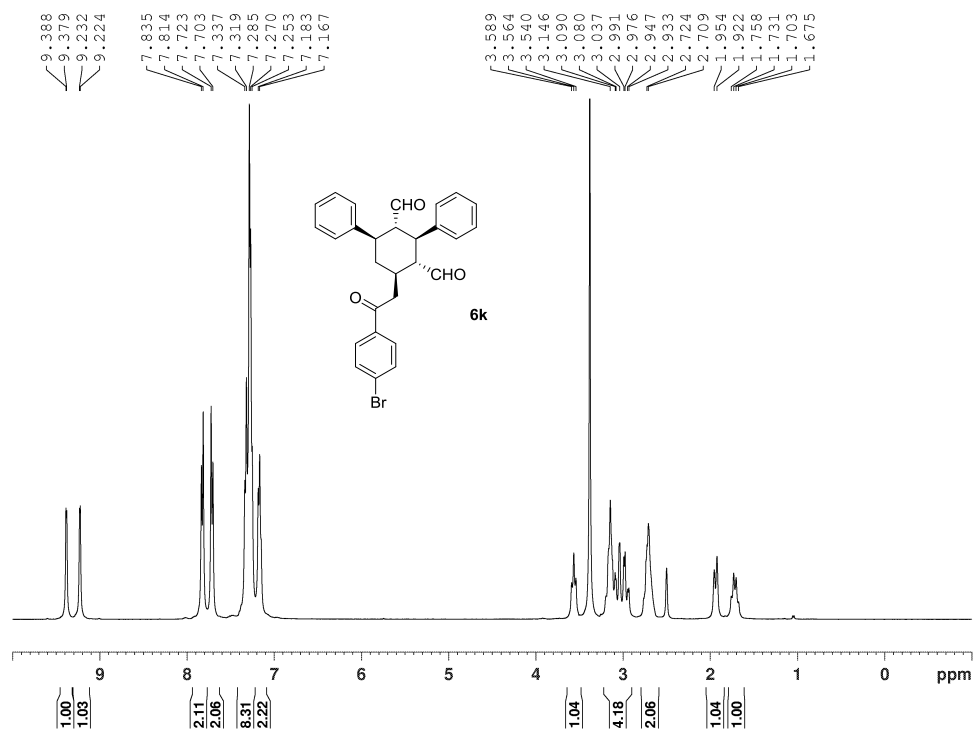

<sup>13</sup>C NMR of **6k** (101M, DMSO-d<sub>6</sub>)

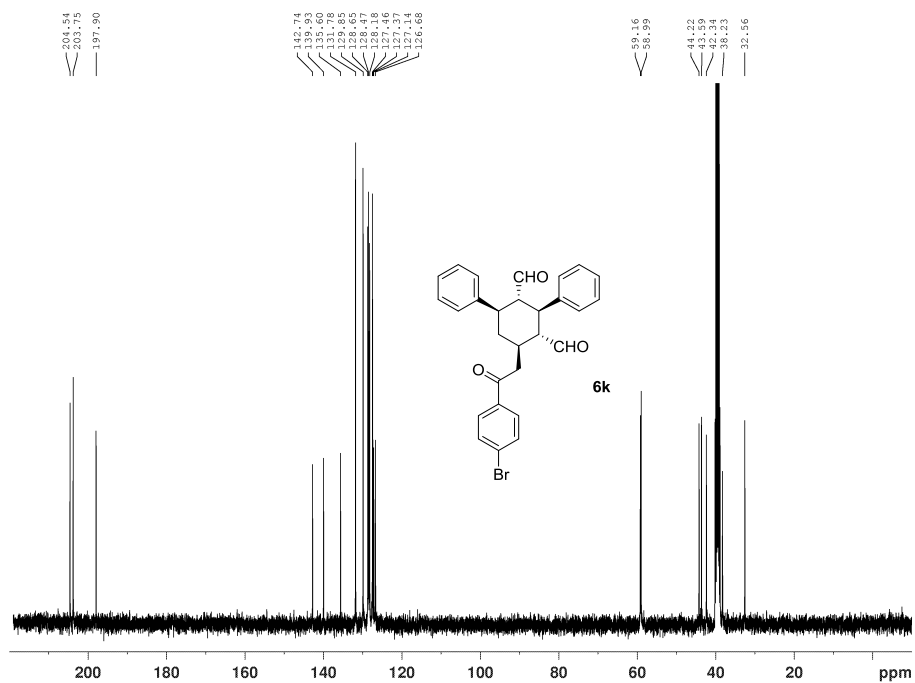



$^1\text{H}$  NMR of **6l** (400M,  $\text{CDCl}_3$ )

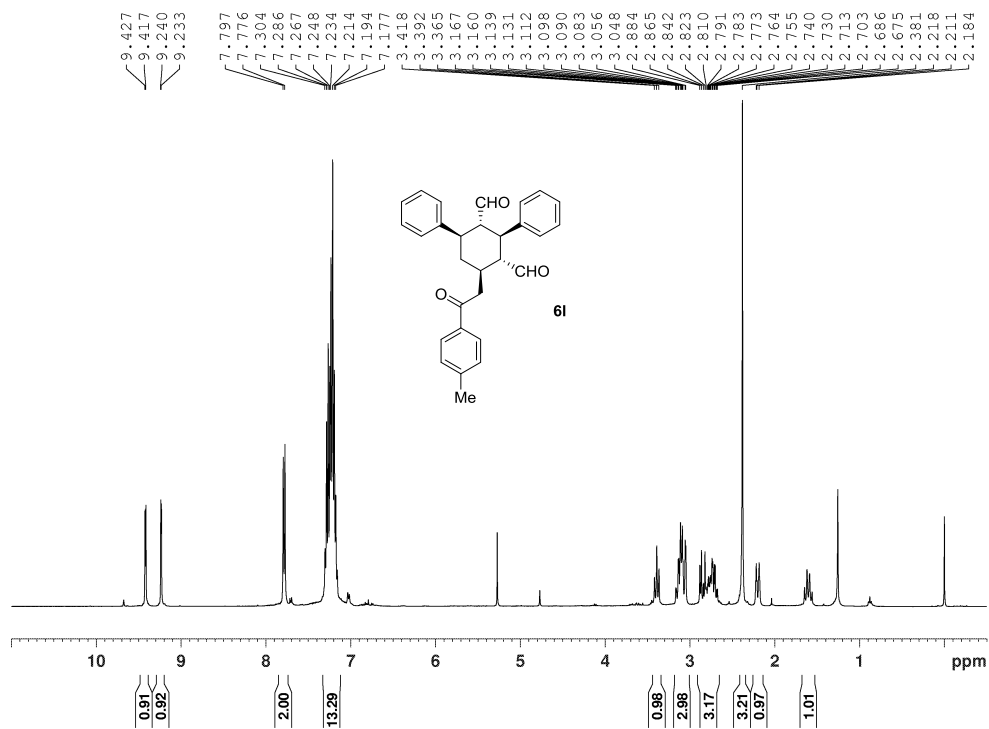

$^{13}\text{C}$  NMR of **6l** (101M,  $\text{CDCl}_3$ )

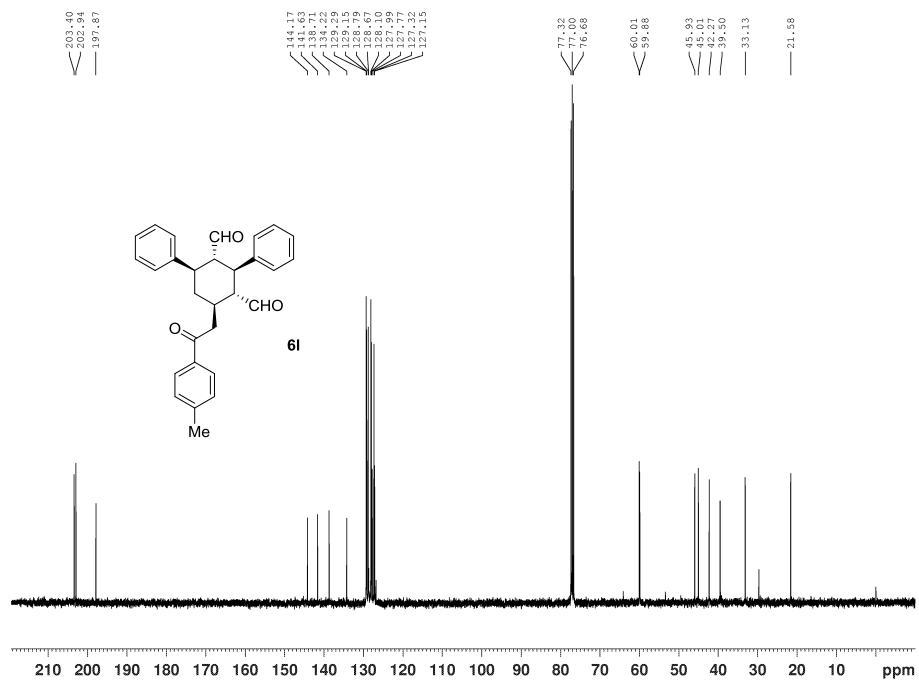

$^1\text{H}$  NMR of **6m** (400M,  $\text{CDCl}_3$ )

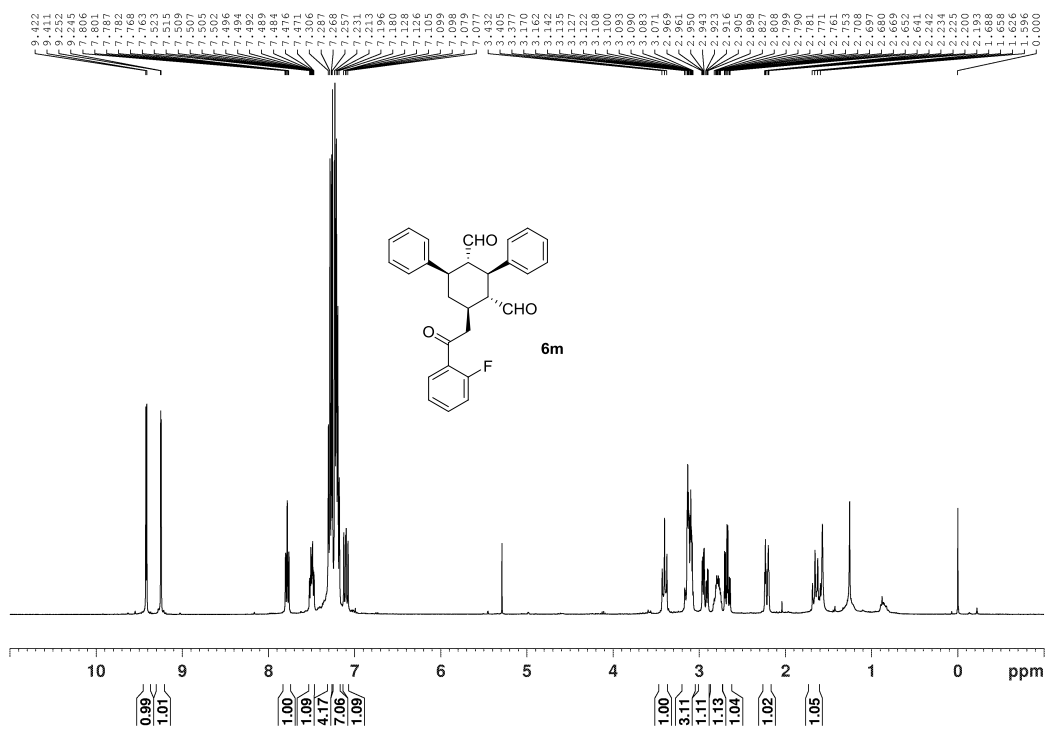

$^{13}\text{C}$  NMR of **6m** (101M,  $\text{CDCl}_3$ )

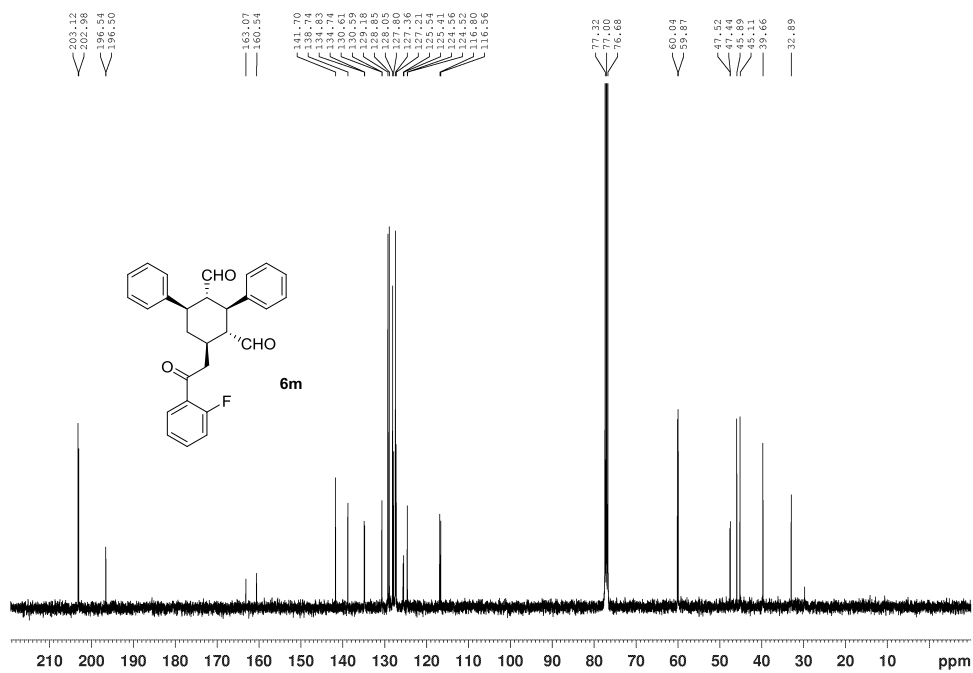

$^1\text{H}$  NMR of **6n** (400M,  $\text{CDCl}_3$ )

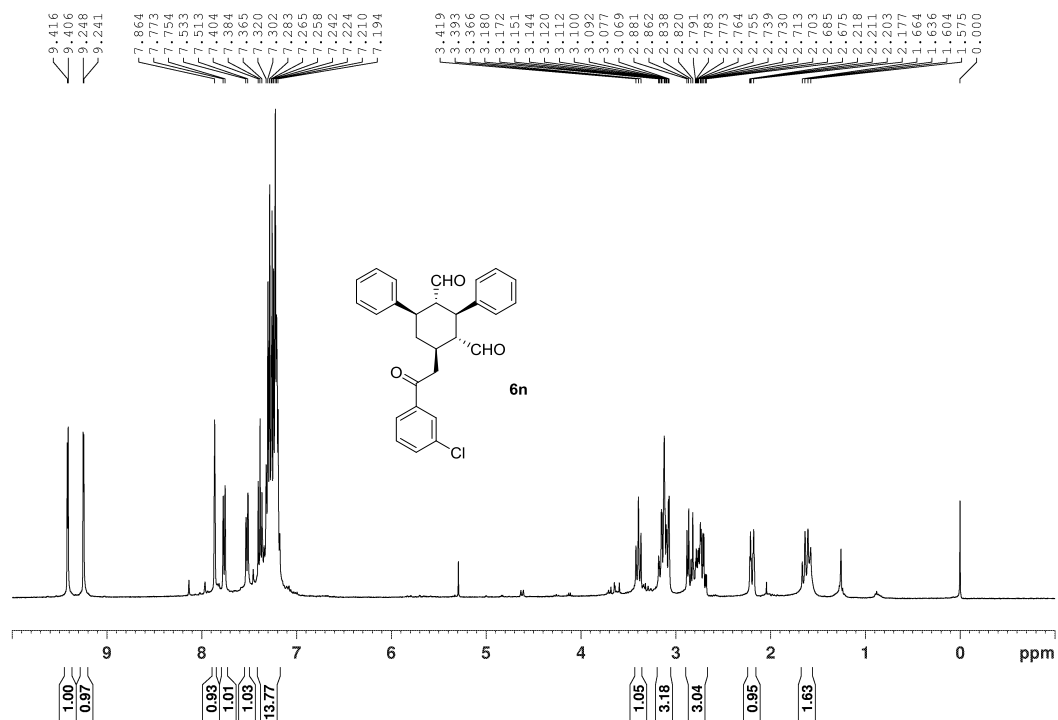

$^{13}\text{C}$  NMR of **6n** (101M,  $\text{CDCl}_3$ )

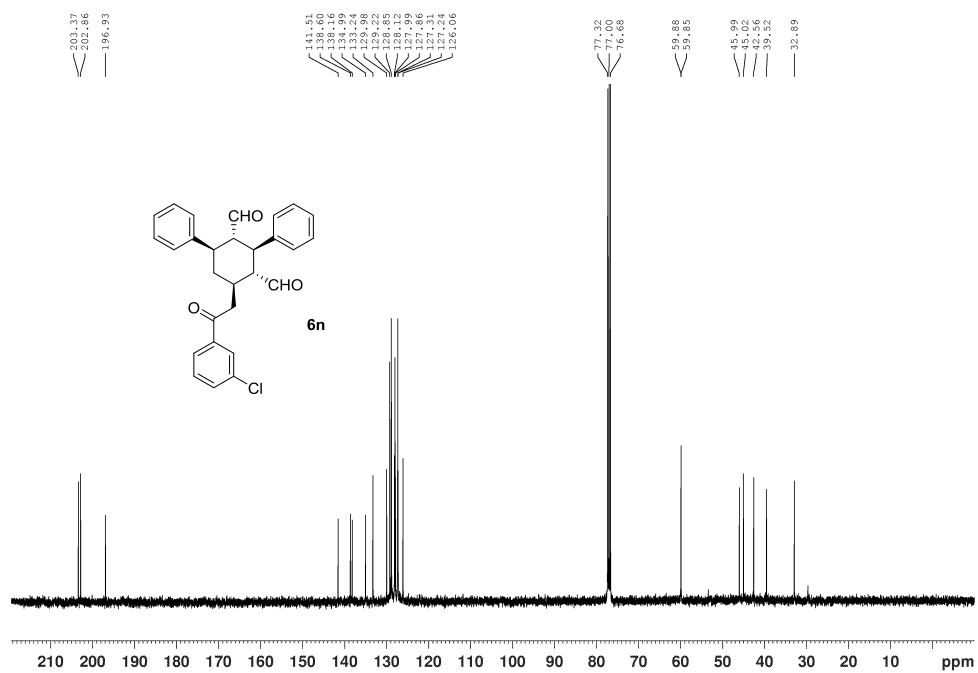

$^1\text{H}$  NMR of **6o** (400M,  $\text{CDCl}_3$ )

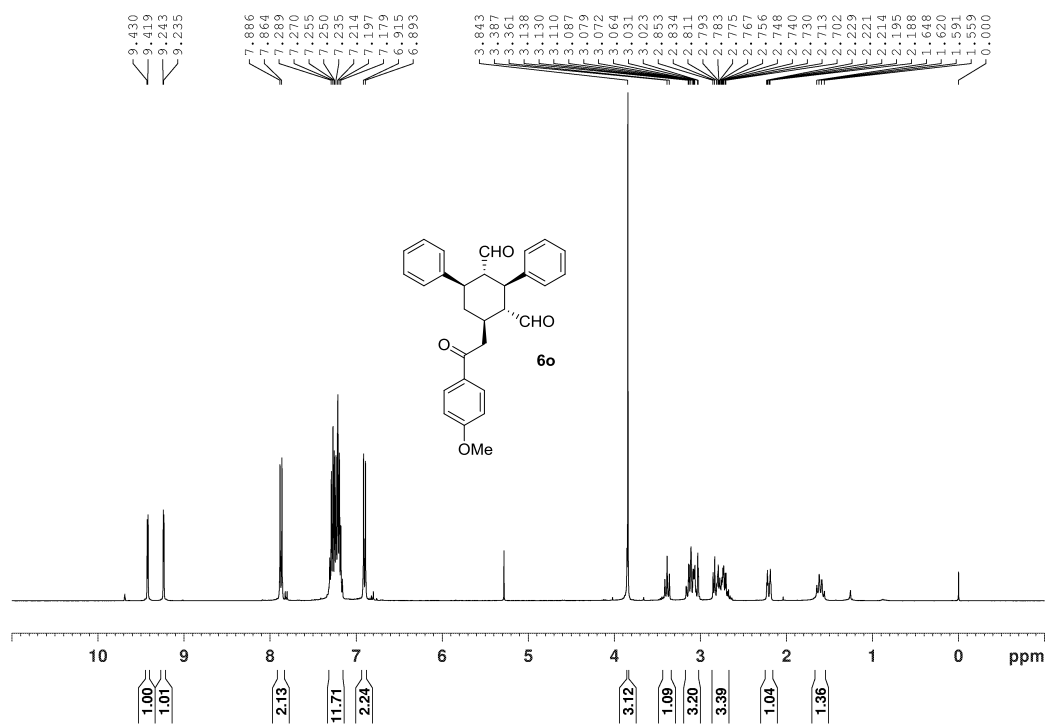

$^{13}\text{C}$  NMR of **6o** (101M,  $\text{CDCl}_3$ )

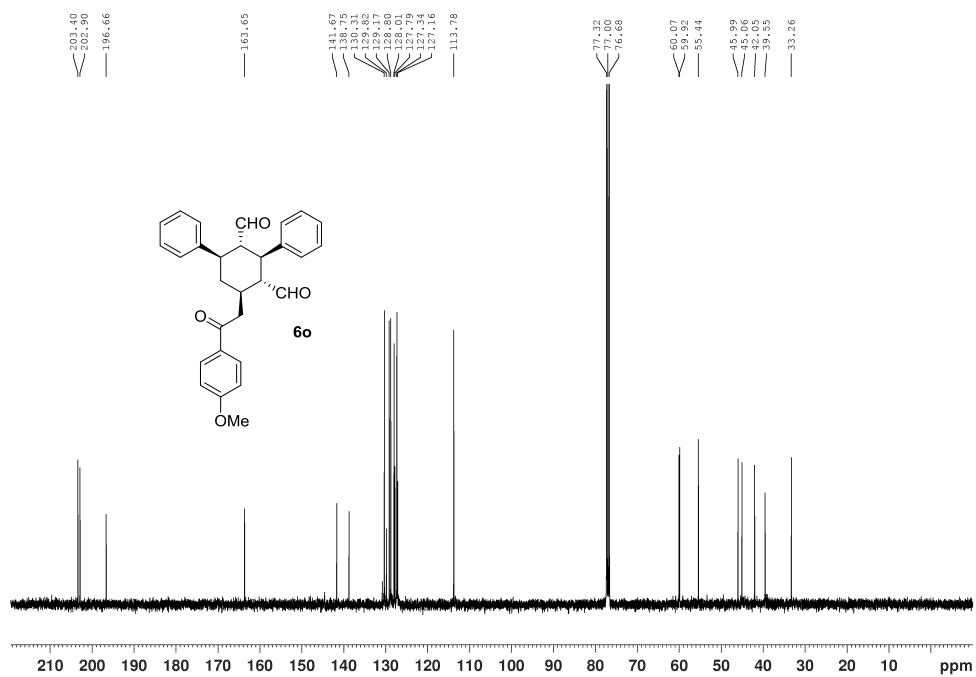

$^1\text{H}$  NMR of **6p** (400M,  $\text{CDCl}_3$ )

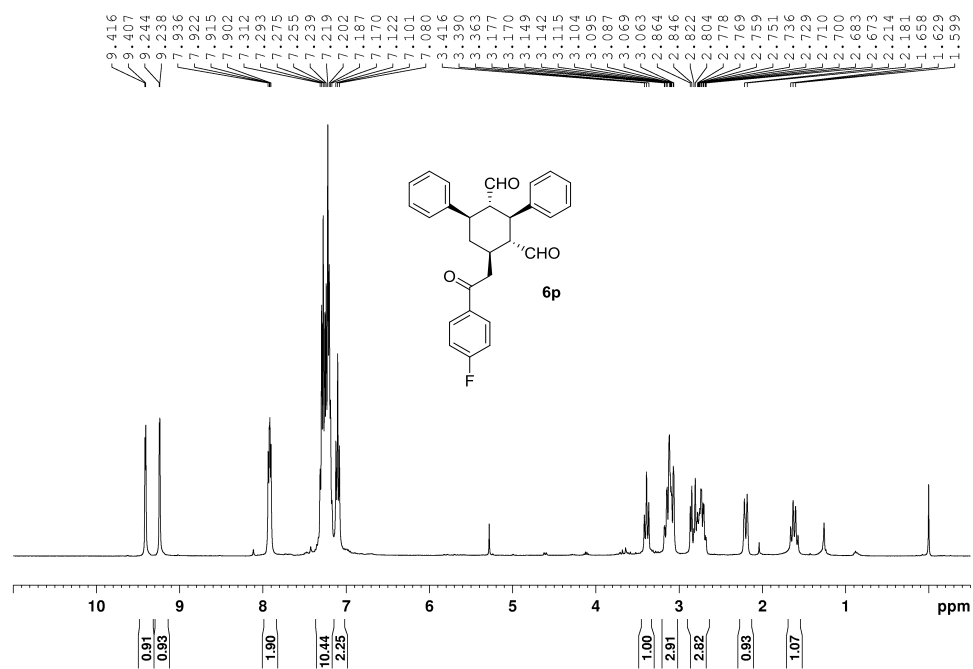

$^{13}\text{C}$  NMR of **6p** (101M,  $\text{CDCl}_3$ )

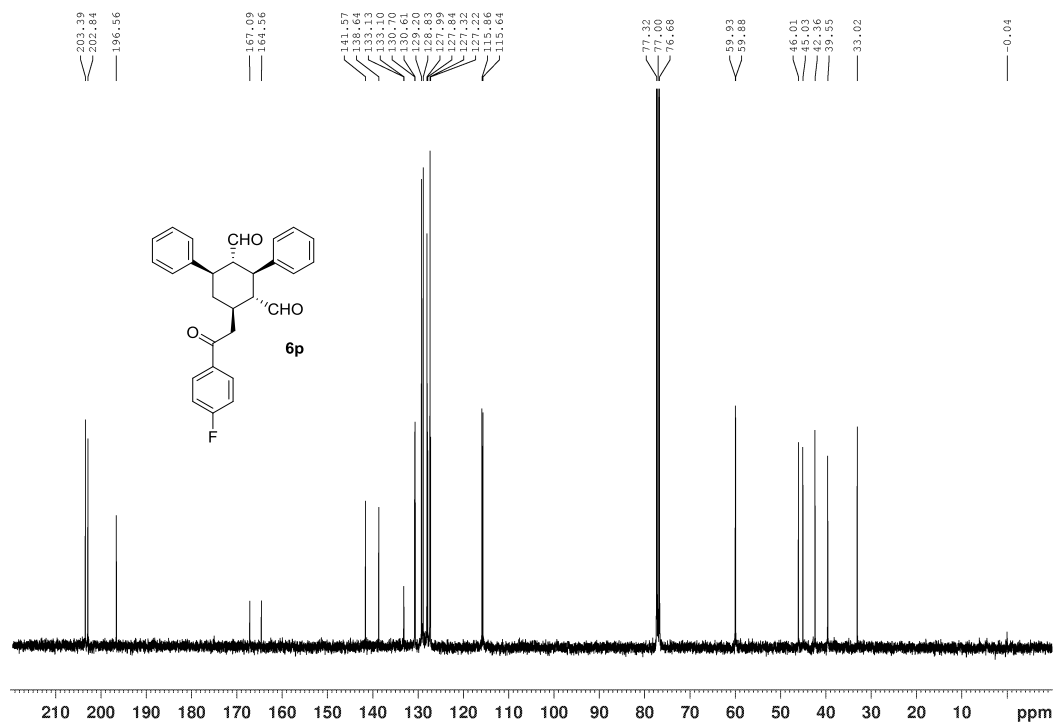

$^1\text{H}$  NMR of **6q** (400M,  $\text{CDCl}_3$ )

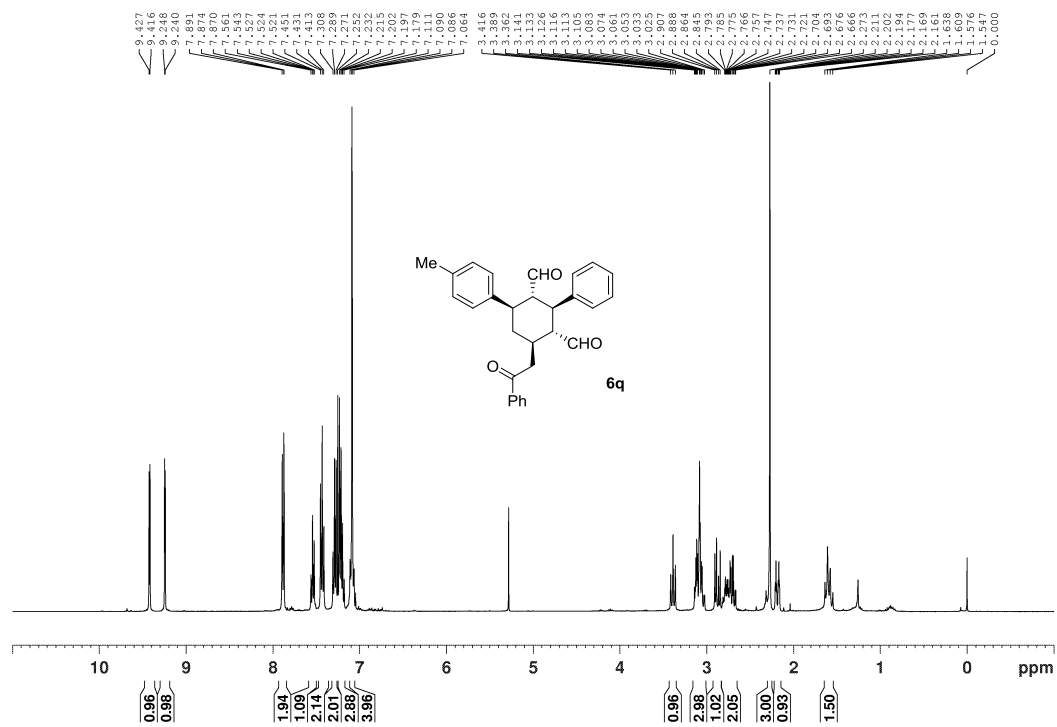

$^{13}\text{C}$  NMR of **6q** (101M,  $\text{CDCl}_3$ )

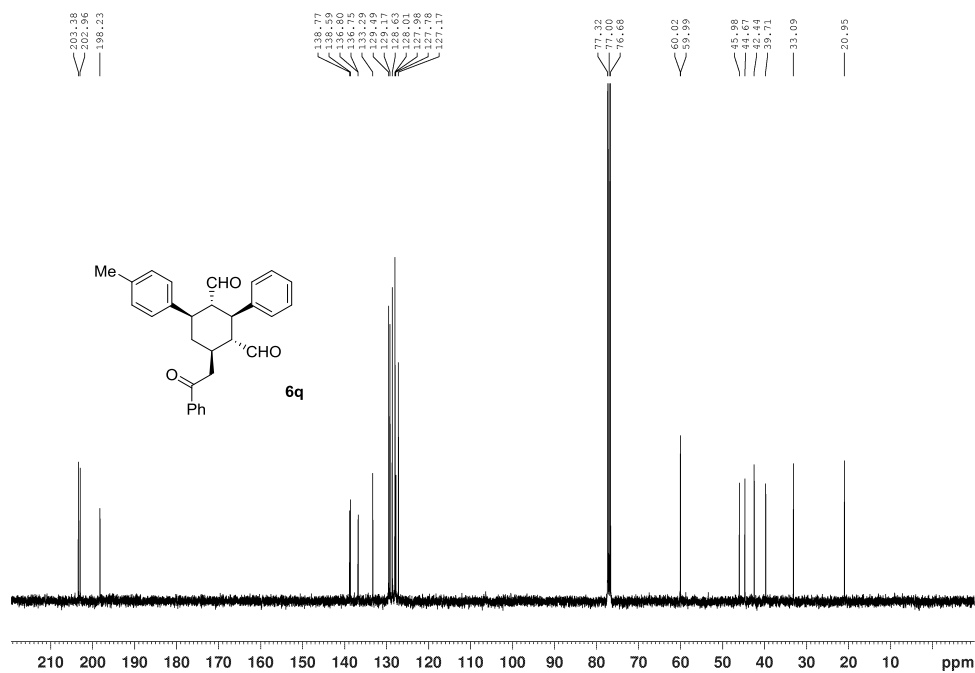



<sup>1</sup>H NMR of **6s** (400M, CDCl<sub>3</sub>)

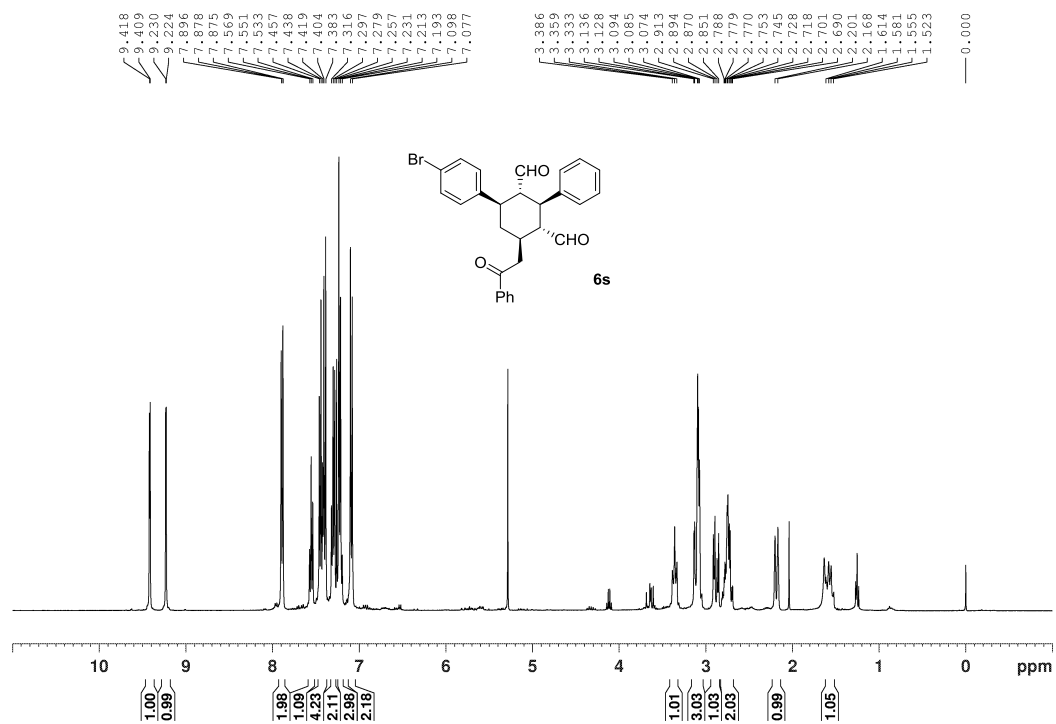

<sup>13</sup>C NMR of **6s** (101M, CDCl<sub>3</sub>)

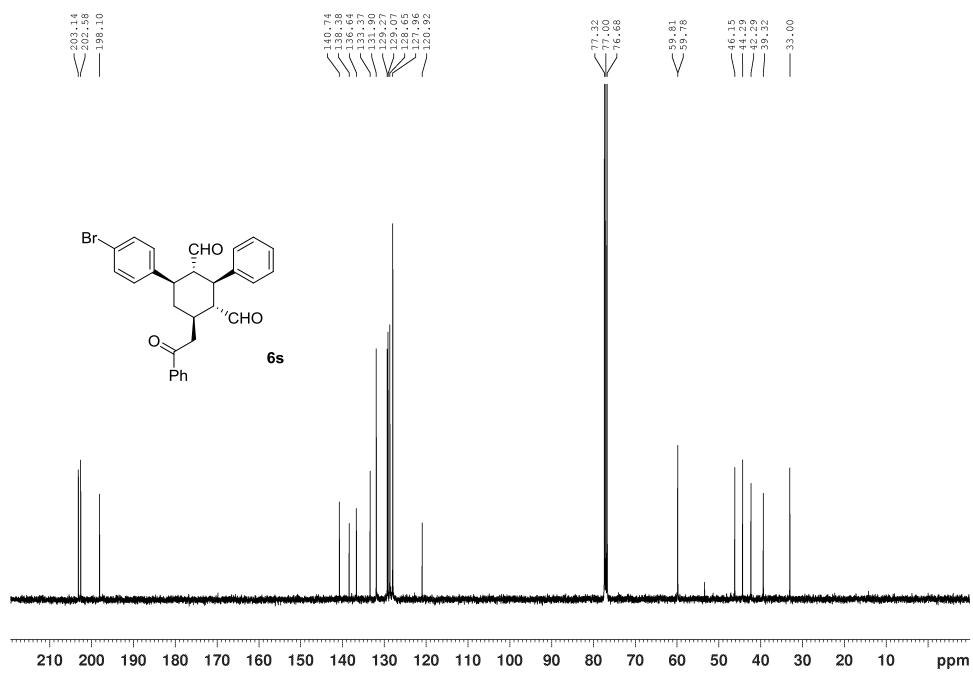



$^1\text{H}$  NMR of **6t** (400M,  $\text{CDCl}_3$ )

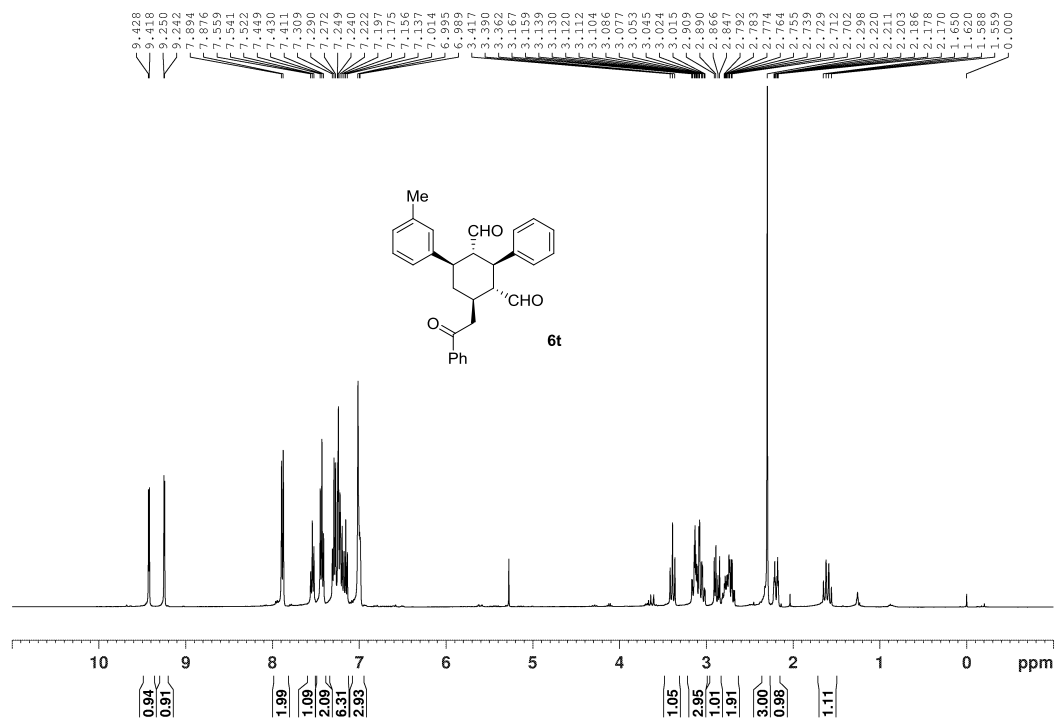

$^{13}\text{C}$  NMR of **6t** (101M,  $\text{CDCl}_3$ )

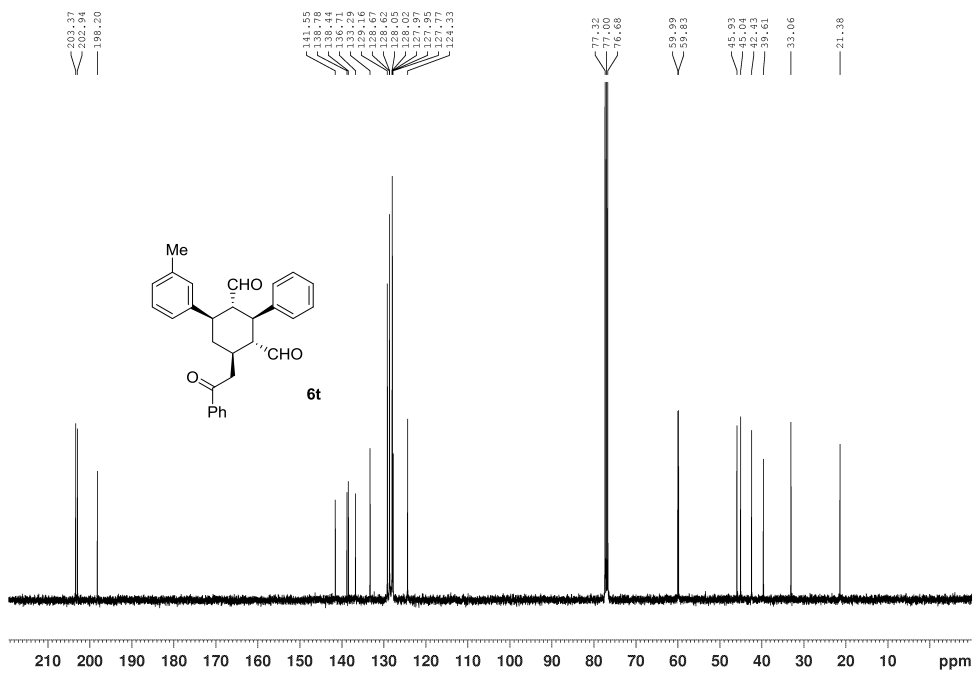

HPLC using an AS column (hexane: *i*-PrOH = 80:20, 1.0 mL/min)

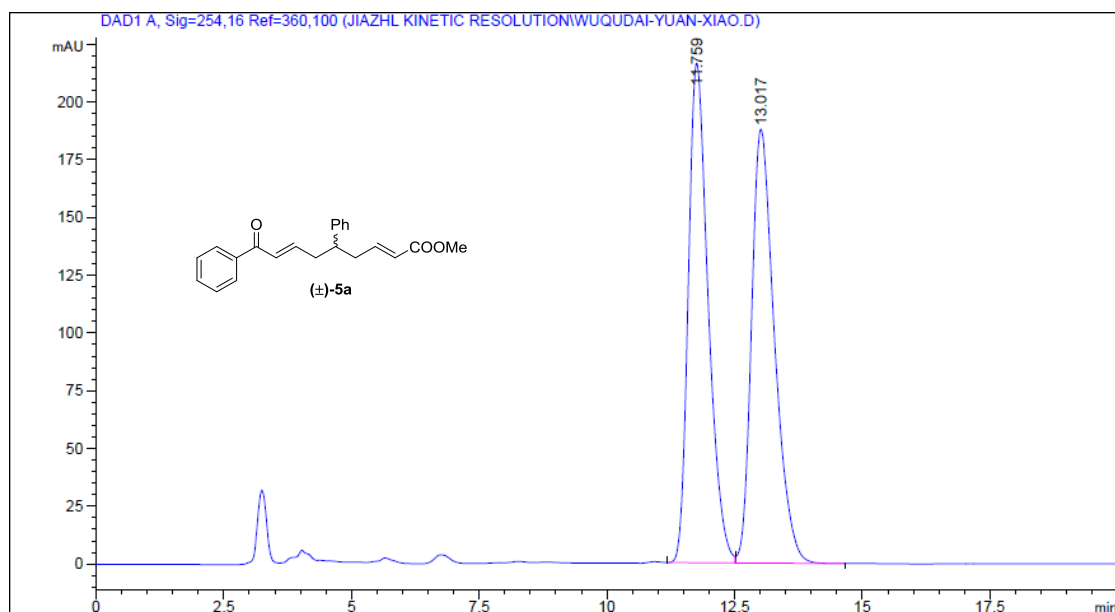

| Peak | Processed Channel | Retention Time (min) | Peak Area (mAU*s) | Peak Height (mAU) | Peak Area (%) |
|------|-------------------|----------------------|-------------------|-------------------|---------------|
| 1    | DAD 254,16 nm     | 11.759               | 5851.89551        | 216.26814         | 49.9915       |
| 2    | DAD 254,16 nm     | 13.017               | 5853.89648        | 187.79453         | 50.0085       |

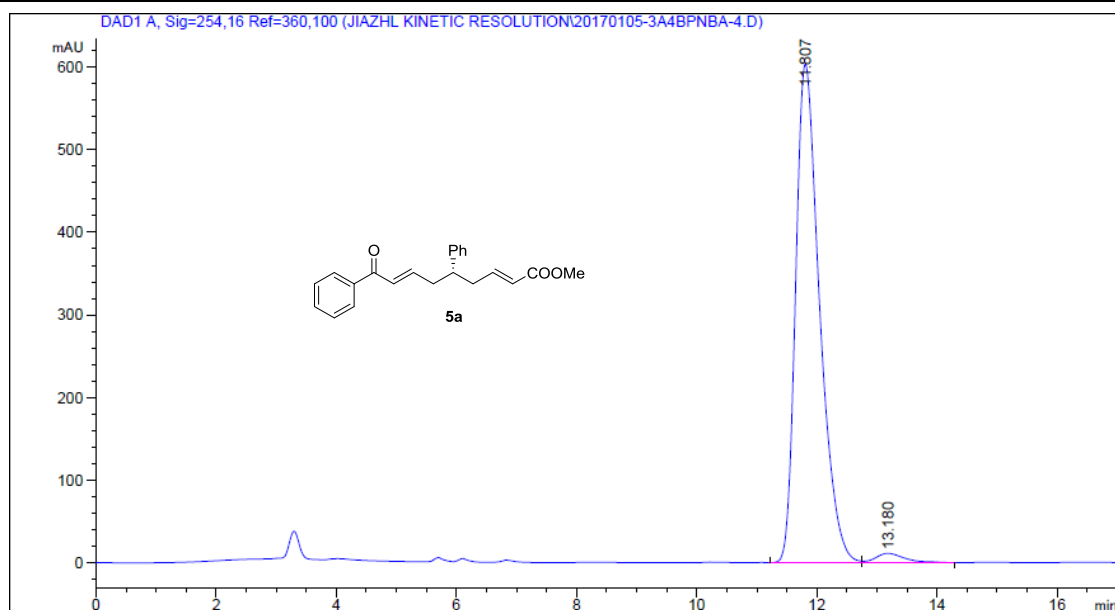

| Peak | Processed Channel | Retention Time (min) | Peak Area (mAU*s) | Peak Height (mAU) | Peak Area (%) |
|------|-------------------|----------------------|-------------------|-------------------|---------------|
| 1    | DAD 254,16 nm     | 11.807               | 1.66291e4         | 603.08282         | 97.7341       |
| 2    | DAD 254,16 nm     | 13.180               | 385.53983         | 11.35658          | 2.2659        |

HPLC using an AS column (hexane: *i*-PrOH = 80:20, 1.0 mL/min)

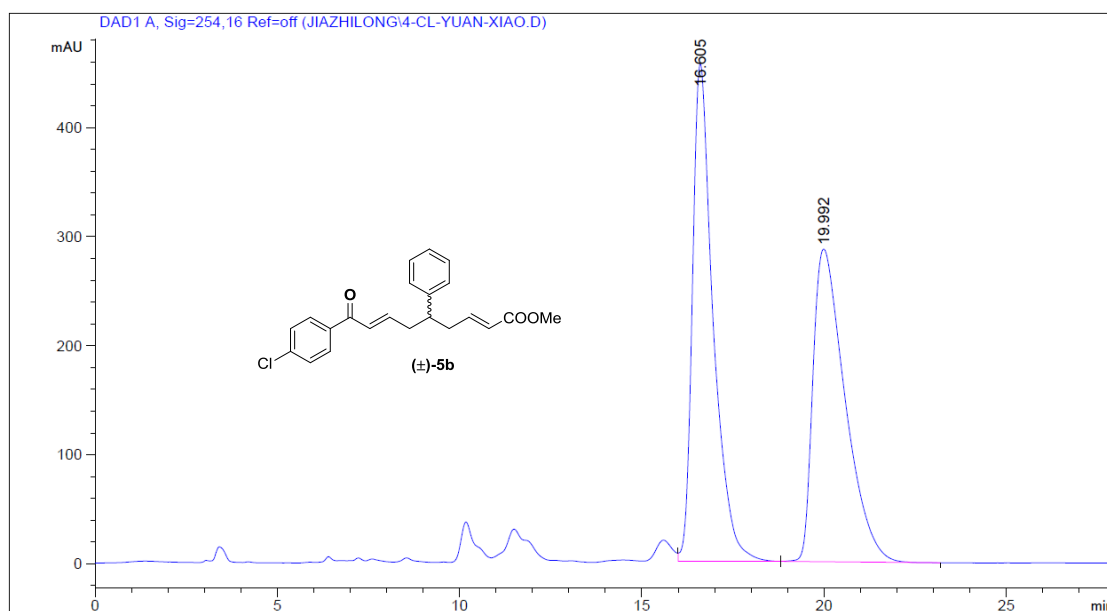

| Peak | Processed Channel | Retention Time (min) | Peak Area (mAU*s) | Peak Height (mAU) | Peak Area (%) |
|------|-------------------|----------------------|-------------------|-------------------|---------------|
| 1    | DAD 254, 16 nm    | 16.605               | 1.80234e4         | 456.15805         | 50.6735       |
| 2    | DAD 254, 16 nm    | 19.992               | 1.75442e4         | 286.77222         | 49.3265       |

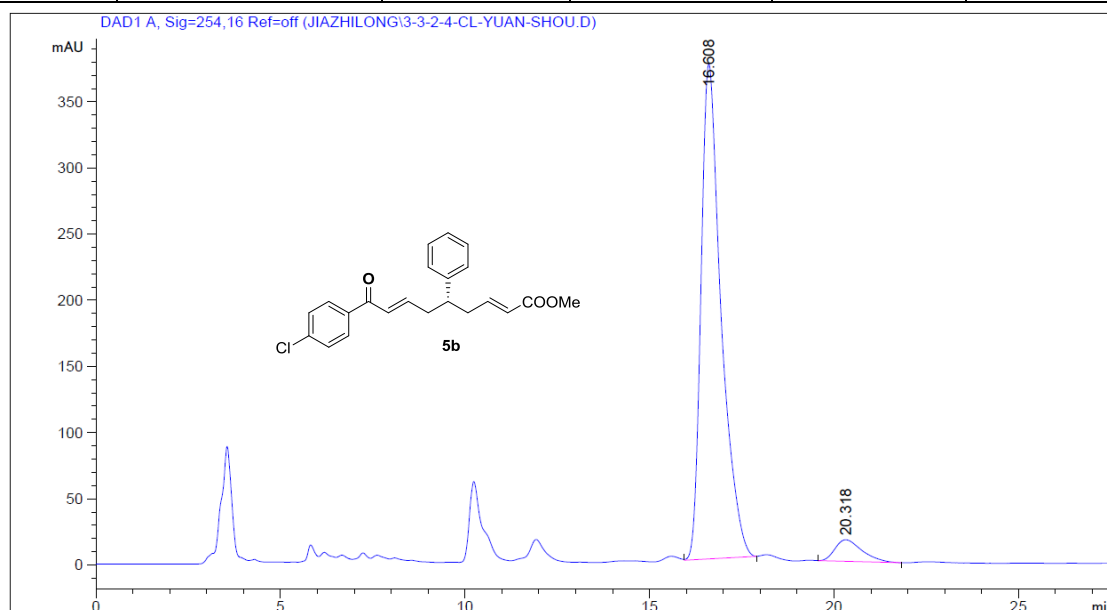

| Peak | Processed Channel | Retention Time (min) | Peak Area (mAU*s) | Peak Height (mAU) | Peak Area (%) |
|------|-------------------|----------------------|-------------------|-------------------|---------------|
| 1    | DAD 254, 16 nm    | 16.608               | 1.41172e4         | 374.07816         | 94.4590       |
| 2    | DAD 254, 16 nm    | 20.318               | 828.12292         | 16.25900          | 5.5410        |

HPLC using an AS column (hexane: *i*-PrOH = 80:20, 1.0 mL/min)

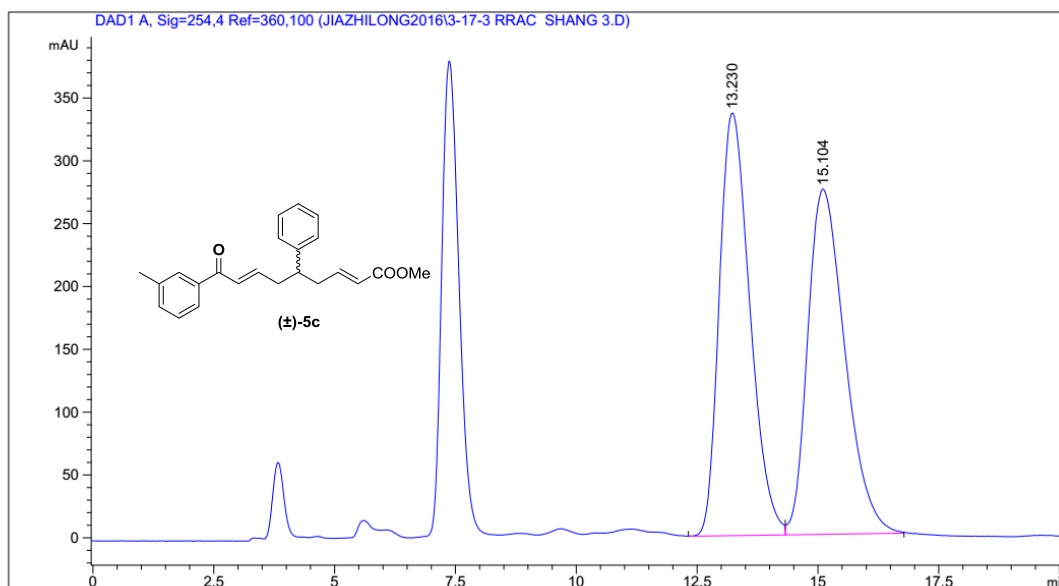

| Peak | Processed Channel | Retention Time (min) | Peak Area (mAU*s) | Peak Height (mAU) | Peak Area (%) |
|------|-------------------|----------------------|-------------------|-------------------|---------------|
| 1    | DAD 254, 4 nm     | 13.230               | 1.47805e4         | 336.27496         | 50.1471       |
| 2    | DAD 254, 4 nm     | 15.104               | 1.46938e4         | 274.74304         | 49.8529       |

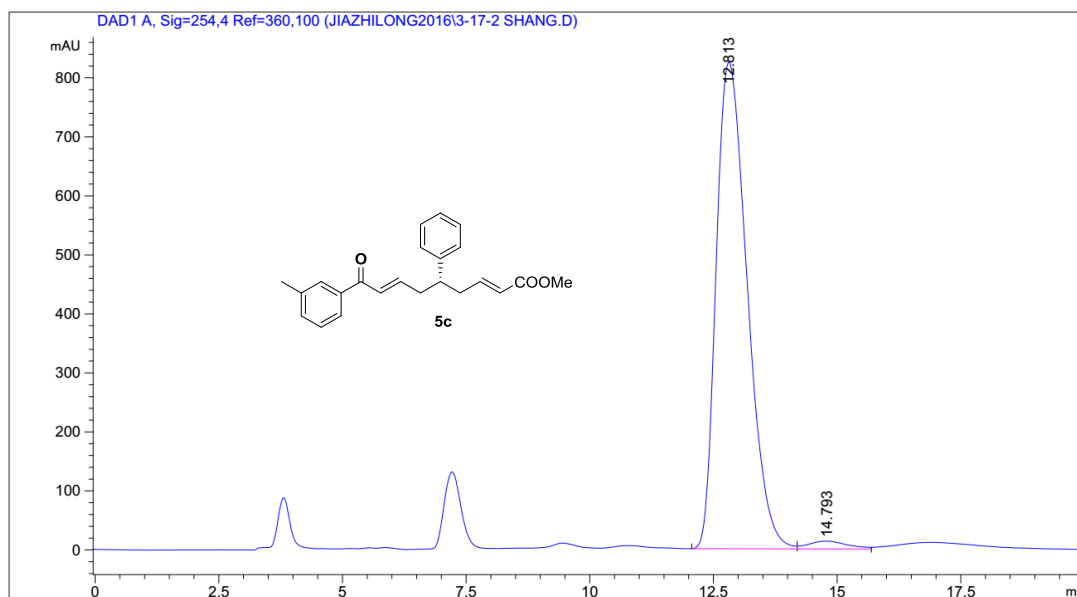

| Peak | Processed Channel | Retention Time (min) | Peak Area (mAU*s) | Peak Height (mAU) | Peak Area (%) |
|------|-------------------|----------------------|-------------------|-------------------|---------------|
| 1    | DAD 254, 4 nm     | 12.813               | 3.58698e4         | 825.17041         | 98.0333       |
| 2    | DAD 254, 4 nm     | 14.793               | 719.58789         | 13.14374          | 1.9667        |

HPLC using an AS column (hexane: *i*-PrOH = 80:20, 1.0 mL/min)

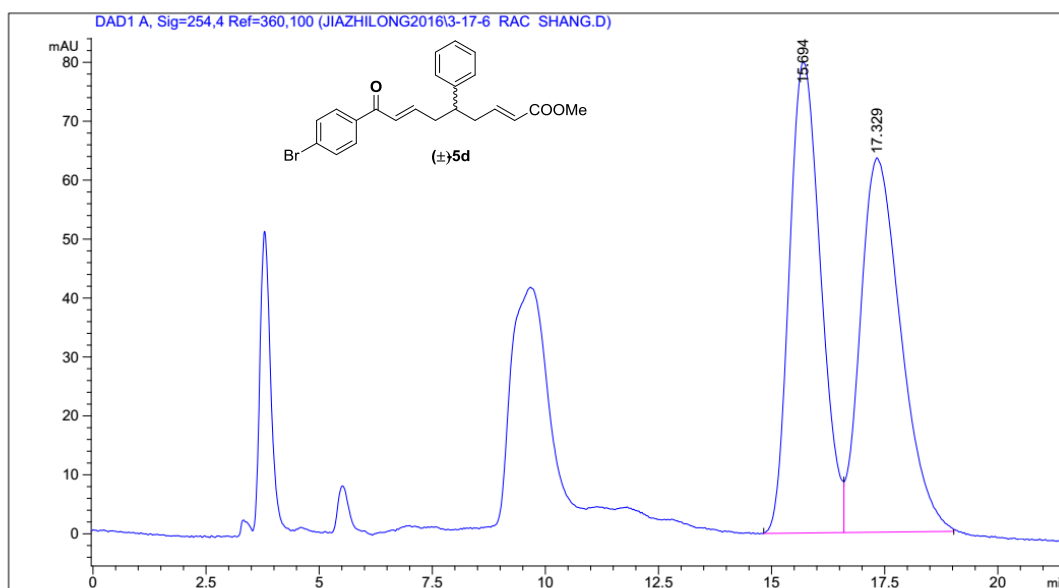

| Peak | Processed Channel | Retention Time (min) | Peak Area (mAU*s) | Peak Height (mAU) | Peak Area (%) |
|------|-------------------|----------------------|-------------------|-------------------|---------------|
| 1    | DAD 254, 4 nm     | 15.694               | 3850.37939        | 79.90881          | 49.2731       |
| 2    | DAD 254, 4 nm     | 17.329               | 3963.98071        | 63.54708          | 50.7269       |

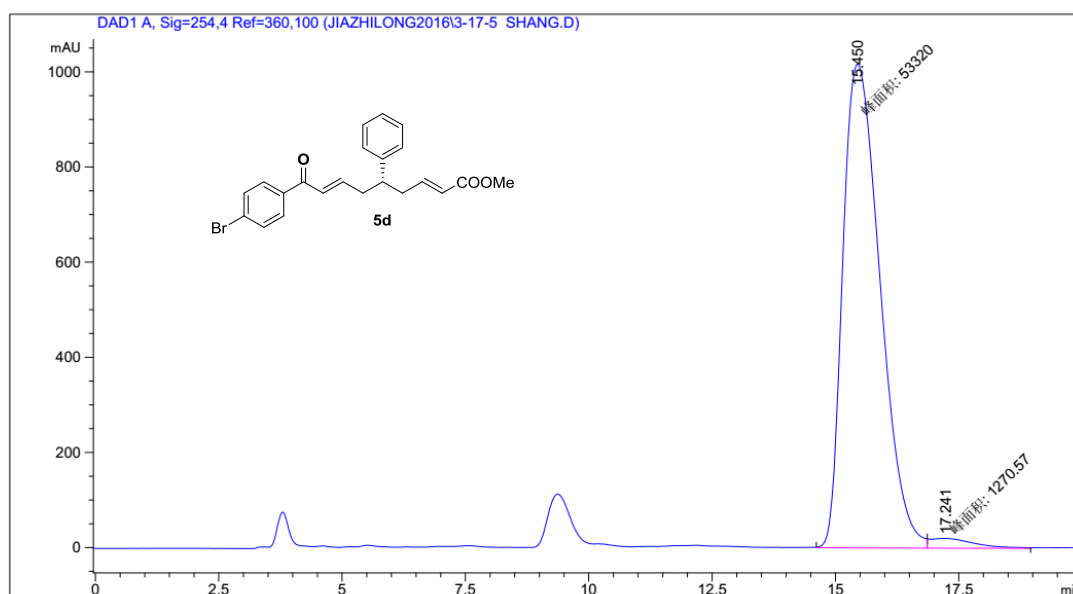

| Peak | Processed Channel | Retention Time (min) | Peak Area (mAU*s) | Peak Height (mAU) | Peak Area (%) |
|------|-------------------|----------------------|-------------------|-------------------|---------------|
| 1    | DAD 254, 4 nm     | 15.450               | 5.33200e4         | 1017.90649        | 97.6725       |
| 2    | DAD 254, 4 nm     | 17.241               | 1270.57446        | 20.32446          | 2.3275        |

HPLC using an AS column (hexane: *i*-PrOH = 80:20, 1.0 mL/min)

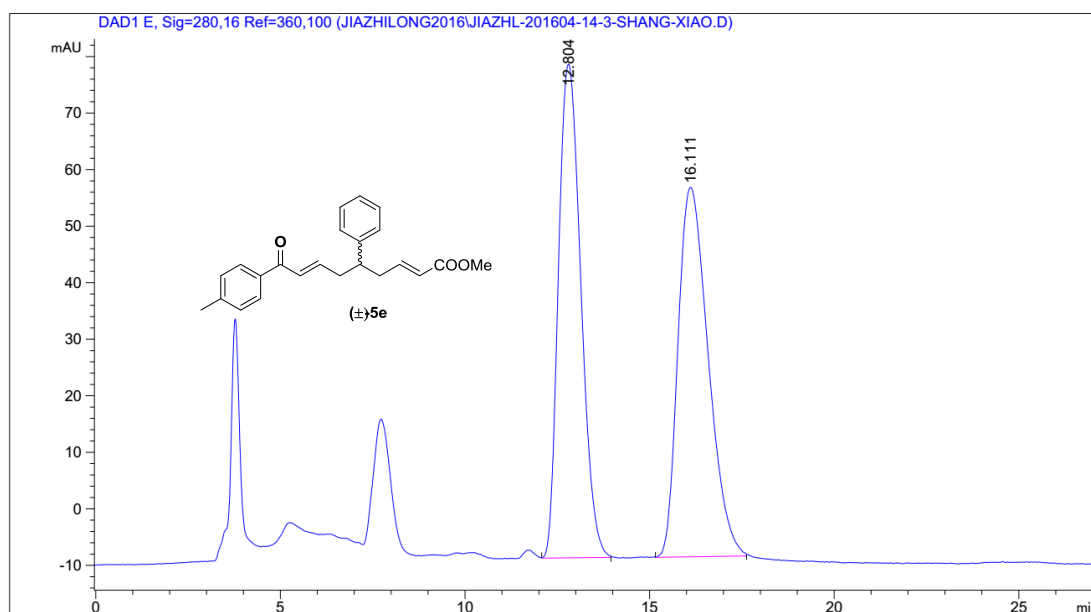

| Peak | Processed Channel | Retention Time (min) | Peak Area (mAU*s) | Peak Height (mAU) | Peak Area (%) |
|------|-------------------|----------------------|-------------------|-------------------|---------------|
| 1    | DAD 280, 16 nm    | 12.804               | 3675.54028        | 87.33235          | 49.8103       |
| 2    | DAD 280, 16 nm    | 16.111               | 3703.53125        | 65.34211          | 50.1897       |

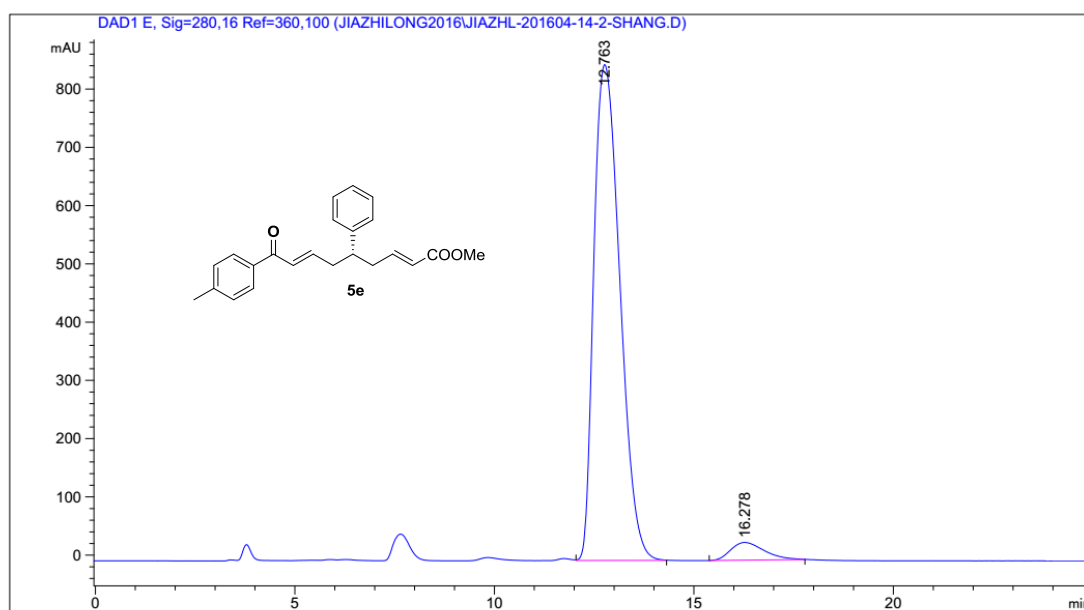

| Peak | Processed Channel | Retention Time (min) | Peak Area (mAU*s) | Peak Height (mAU) | Peak Area (%) |
|------|-------------------|----------------------|-------------------|-------------------|---------------|
| 1    | DAD 280, 16 nm    | 12.763               | 3.85833e4         | 851.10498         | 95.5695       |
| 2    | DAD 280, 16 nm    | 16.278               | 1788.66980        | 30.48558          | 4.4305        |

HPLC using an AS column (hexane: *i*-PrOH = 80:20, 1.0 mL/min)

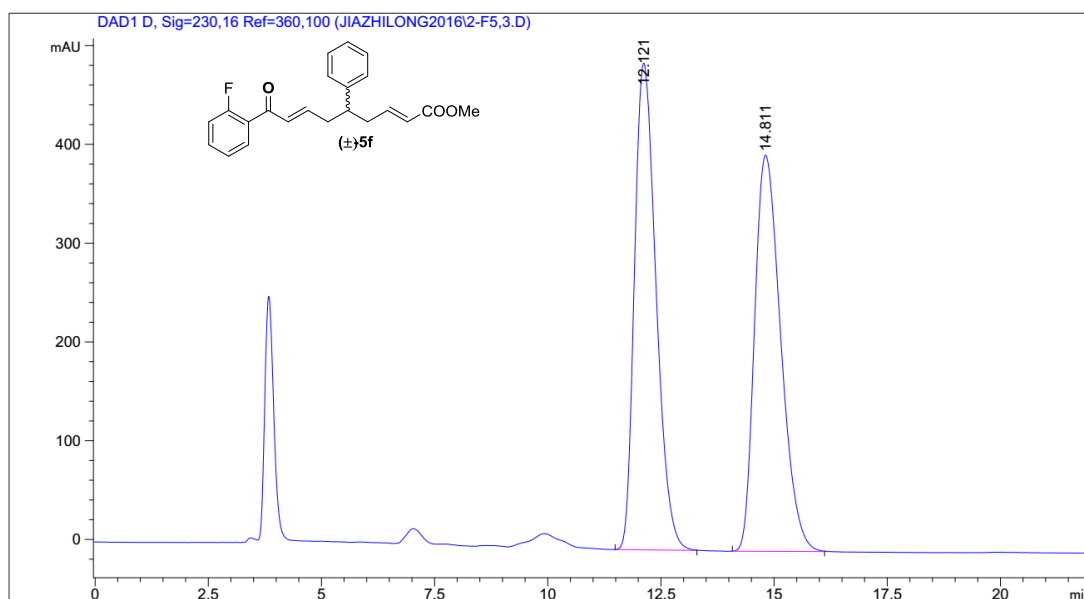

| Peak | Processed Channel | Retention Time (min) | Peak Area (mAU*s) | Peak Height (mAU) | Peak Area (%) |
|------|-------------------|----------------------|-------------------|-------------------|---------------|
| 1    | DAD 230, 16 nm    | 12.121               | 1.62845e4         | 492.78973         | 50.3320       |
| 2    | DAD 230, 16 nm    | 14.811               | 1.60697e4         | 401.10657         | 49.6680       |

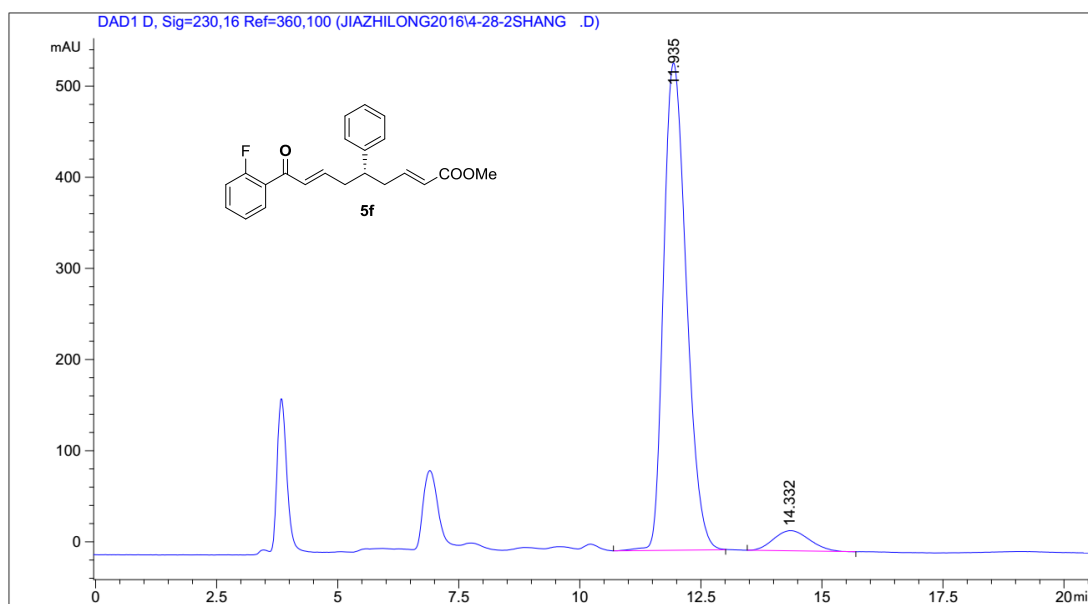

| Peak | Processed Channel | Retention Time (min) | Peak Area (mAU*s) | Peak Height (mAU) | Peak Area (%) |
|------|-------------------|----------------------|-------------------|-------------------|---------------|
| 1    | DAD 230, 16 nm    | 11.935               | 1.74840e4         | 534.64960         | 93.9158       |
| 2    | DAD 230, 16 nm    | 14.332               | 1132.67139        | 22.10943          | 6.0842        |

HPLC using an AS column (hexane: *i*-PrOH = 80:20, 1.0 mL/min)

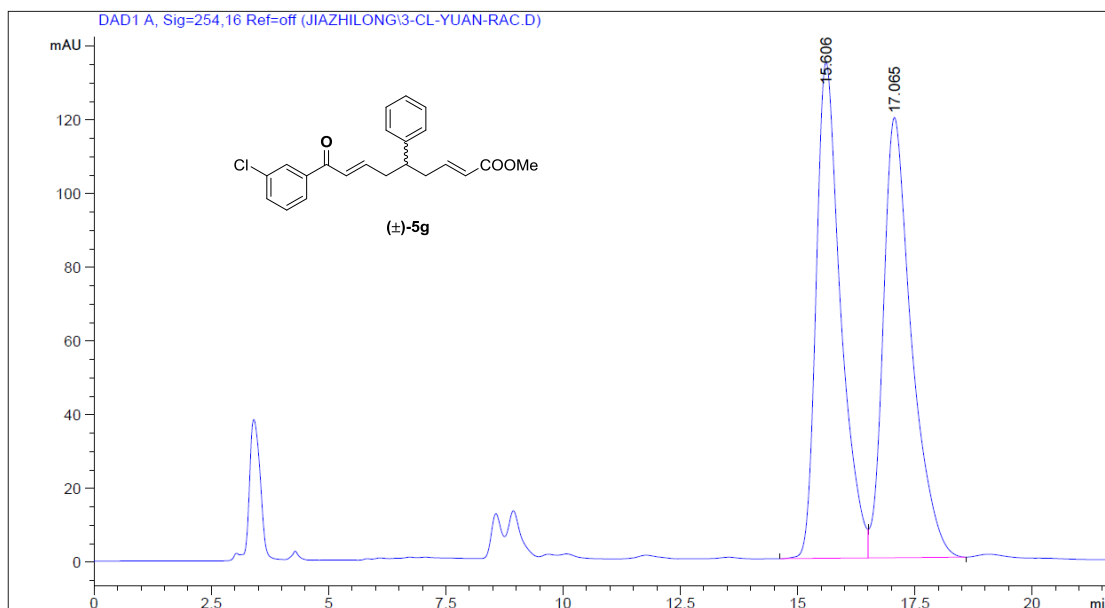

| Peak | Processed Channel | Retention Time (min) | Peak Area (mAU*s) | Peak Height (mAU) | Peak Area (%) |
|------|-------------------|----------------------|-------------------|-------------------|---------------|
| 1    | DAD 254, 16 nm    | 15.606               | 4898.58252        | 134.65163         | 49.4811       |
| 2    | DAD 254, 16 nm    | 17.065               | 5001.32764        | 119.42539         | 50.5189       |

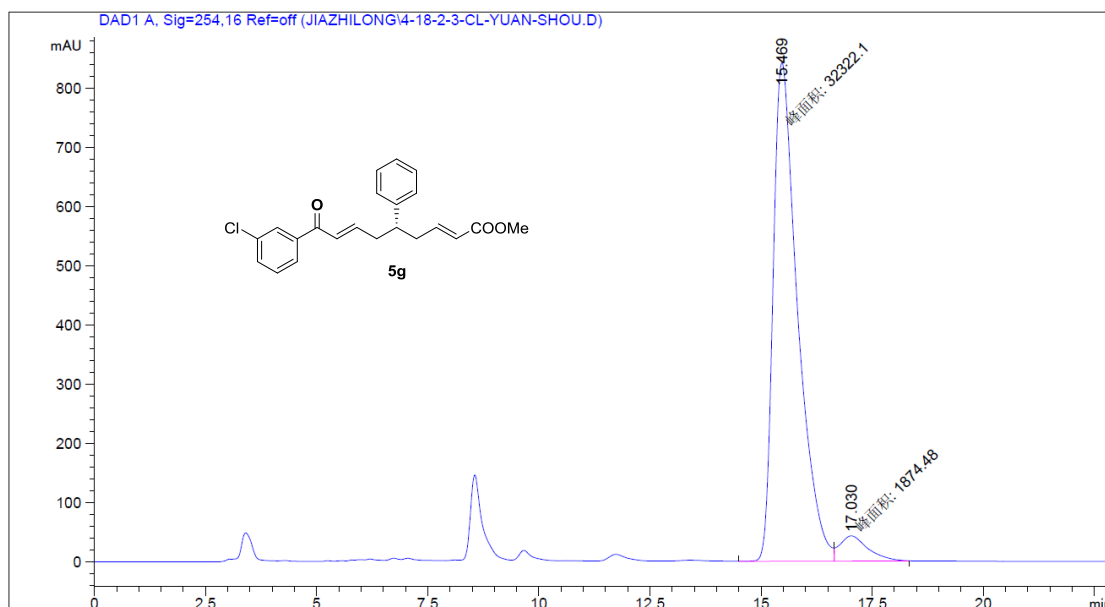

| Peak | Processed Channel | Retention Time (min) | Peak Area (mAU*s) | Peak Height (mAU) | Peak Area (%) |
|------|-------------------|----------------------|-------------------|-------------------|---------------|
| 1    | DAD 254, 16 nm    | 15.469               | 3.23221e4         | 842.05261         | 94.5185       |
| 2    | DAD 254, 16 nm    | 17.030               | 1874.48193        | 42.53213          | 5.4815        |



HPLC using an AS column (hexane: *i*-PrOH = 80:20, 1.0 mL/min)

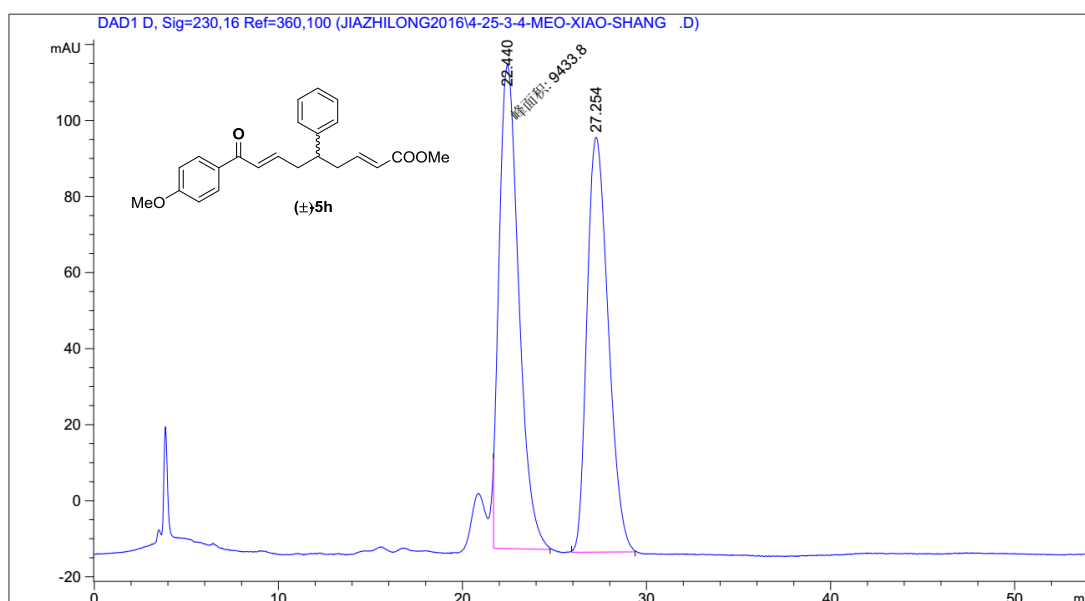

| Peak | Processed Channel | Retention Time (min) | Peak Area (mAU*s) | Peak Height (mAU) | Peak Area (%) |
|------|-------------------|----------------------|-------------------|-------------------|---------------|
| 1    | DAD 230, 16 nm    | 22.440               | 9433.79688        | 127.34587         | 51.8876       |
| 2    | DAD 230, 16 nm    | 27.254               | 8747.41797        | 109.12292         | 48.1124       |

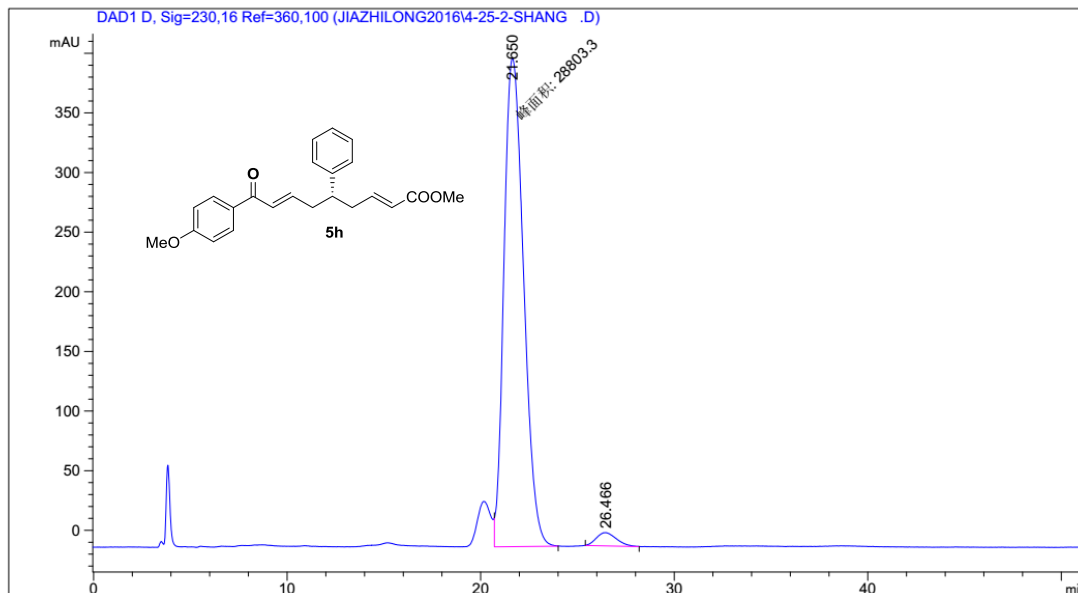

| Peak | Processed Channel | Retention Time (min) | Peak Area (mAU*s) | Peak Height (mAU) | Peak Area (%) |
|------|-------------------|----------------------|-------------------|-------------------|---------------|
| 1    | DAD 230, 16 nm    | 21.650               | 2.88033e4         | 409.35922         | 97.3151       |
| 2    | DAD 230, 16 nm    | 26.466               | 794.68066         | 11.14236          | 2.6849        |

HPLC using an AS column (hexane: *i*-PrOH = 80:20, 1.0 mL/min)

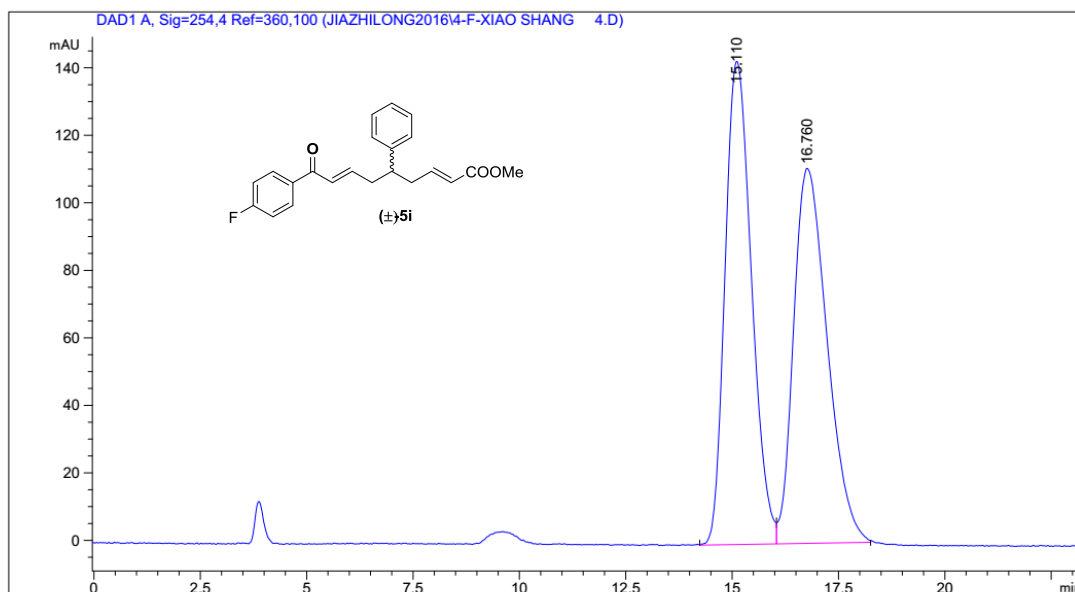

| Peak | Processed Channel | Retention Time (min) | Peak Area (mAU*s) | Peak Height (mAU) | Peak Area (%) |
|------|-------------------|----------------------|-------------------|-------------------|---------------|
| 1    | DAD 254, 4 nm     | 15.110               | 6185.77832        | 143.14149         | 50.4013       |
| 2    | DAD 254, 4 nm     | 16.760               | 6087.28467        | 111.09929         | 49.5987       |

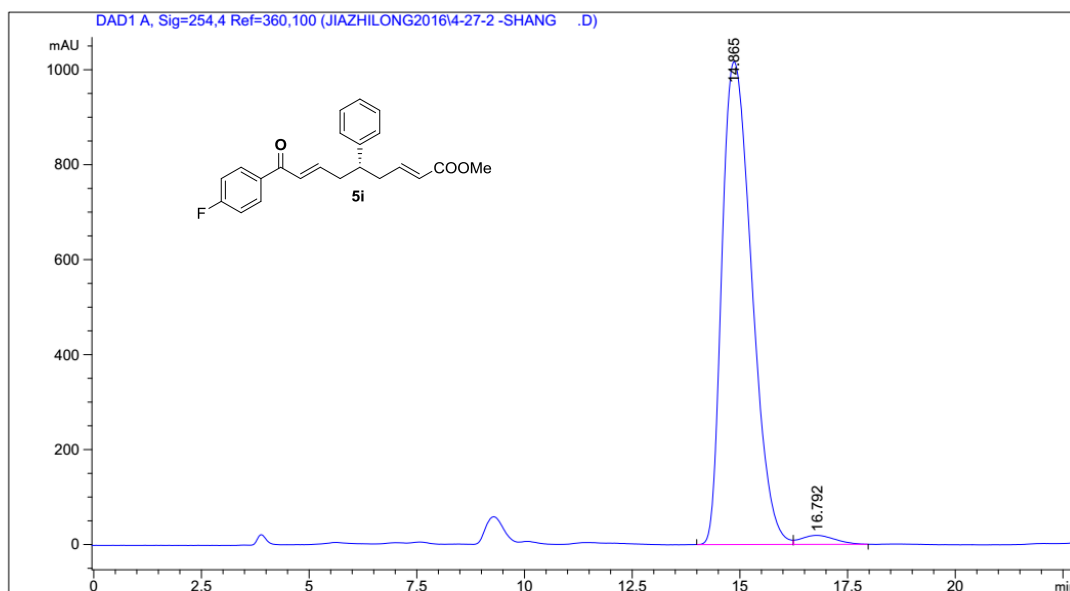

| Peak | Processed Channel | Retention Time (min) | Peak Area (mAU*s) | Peak Height (mAU) | Peak Area (%) |
|------|-------------------|----------------------|-------------------|-------------------|---------------|
| 1    | DAD 254, 4 nm     | 14.865               | 4.88781e4         | 1017.24554        | 97.9102       |
| 2    | DAD 254, 4 nm     | 16.792               | 1043.27332        | 19.13320          | 2.0898        |

HPLC using an AS column (hexane: *i*-PrOH = 80:20, 1.0 mL/min)

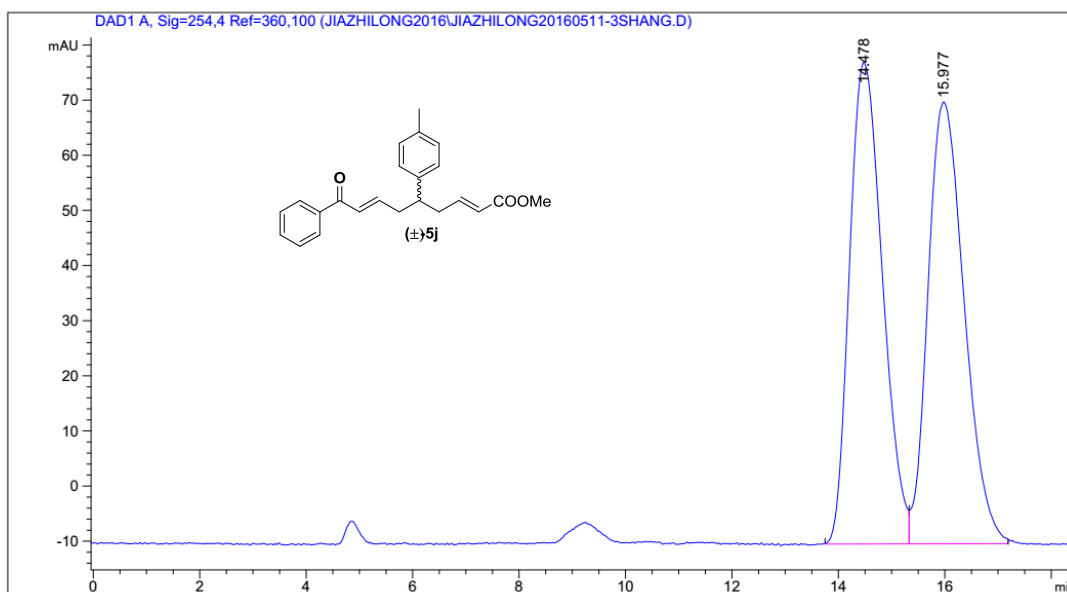

| Peak | Processed Channel | Retention Time (min) | Peak Area (mAU*s) | Peak Height (mAU) | Peak Area (%) |
|------|-------------------|----------------------|-------------------|-------------------|---------------|
| 1    | DAD 254, 4 nm     | 14.478               | 3758.25244        | 87.45330          | 49.7217       |
| 2    | DAD 254, 4 nm     | 15.977               | 3800.32617        | 80.14983          | 50.2783       |

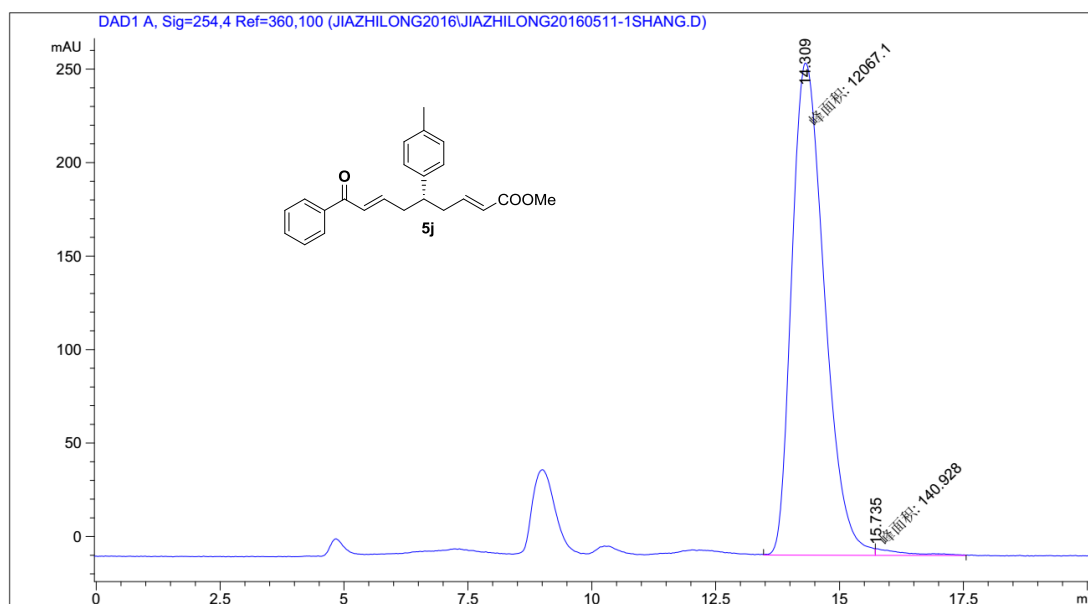

| Peak | Processed Channel | Retention Time (min) | Peak Area (mAU*s) | Peak Height (mAU) | Peak Area (%) |
|------|-------------------|----------------------|-------------------|-------------------|---------------|
| 1    | DAD 254, 4 nm     | 14.309               | 1.20671e4         | 263.18414         | 98.8456       |
| 2    | DAD 254, 4 nm     | 15.735               | 140.92809         | 3.52518           | 1.1544        |

HPLC using an AS column (hexane: *i*-PrOH = 80:20, 1.0 mL/min)

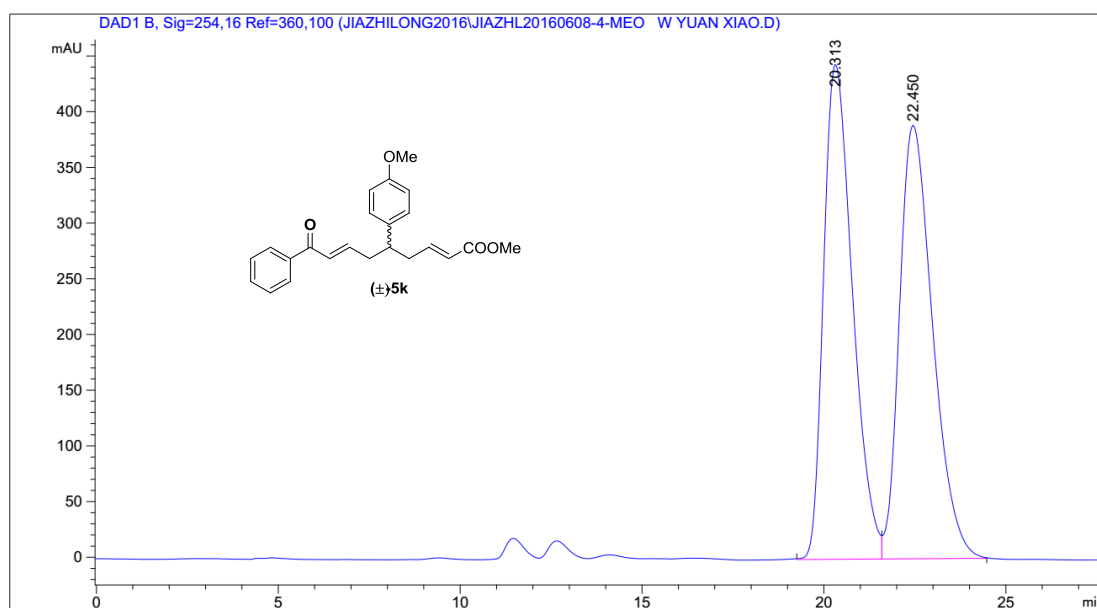

| Peak | Processed Channel | Retention Time (min) | Peak Area (mAU*s) | Peak Height (mAU) | Peak Area (%) |
|------|-------------------|----------------------|-------------------|-------------------|---------------|
| 1    | DAD 254, 16 nm    | 20.313               | 2.45412e4         | 444.10345         | 49.8146       |
| 2    | DAD 254, 16 nm    | 22.450               | 2.47239e4         | 389.03632         | 50.1854       |

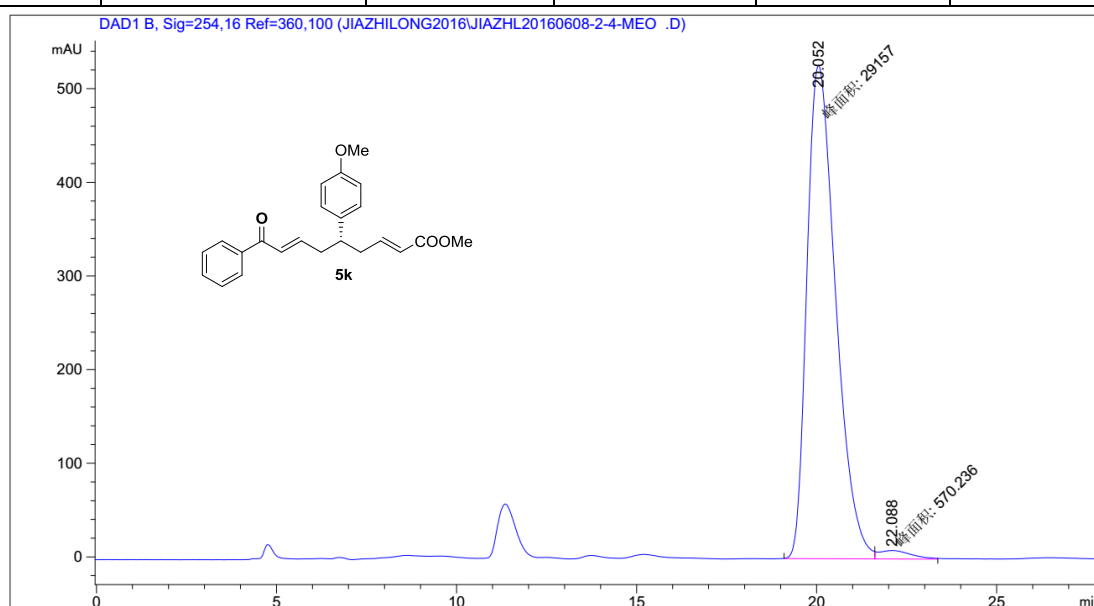

| Peak | Processed Channel | Retention Time (min) | Peak Area (mAU*s) | Peak Height (mAU) | Peak Area (%) |
|------|-------------------|----------------------|-------------------|-------------------|---------------|
| 1    | DAD 254, 16 nm    | 20.052               | 2.91570e4         | 526.70801         | 98.0818       |
| 2    | DAD 254, 16 nm    | 22.088               | 570.23621         | 9.06597           | 1.9182        |

HPLC using an AS column (hexane: *i*-PrOH = 80:20, 1.0 mL/min)

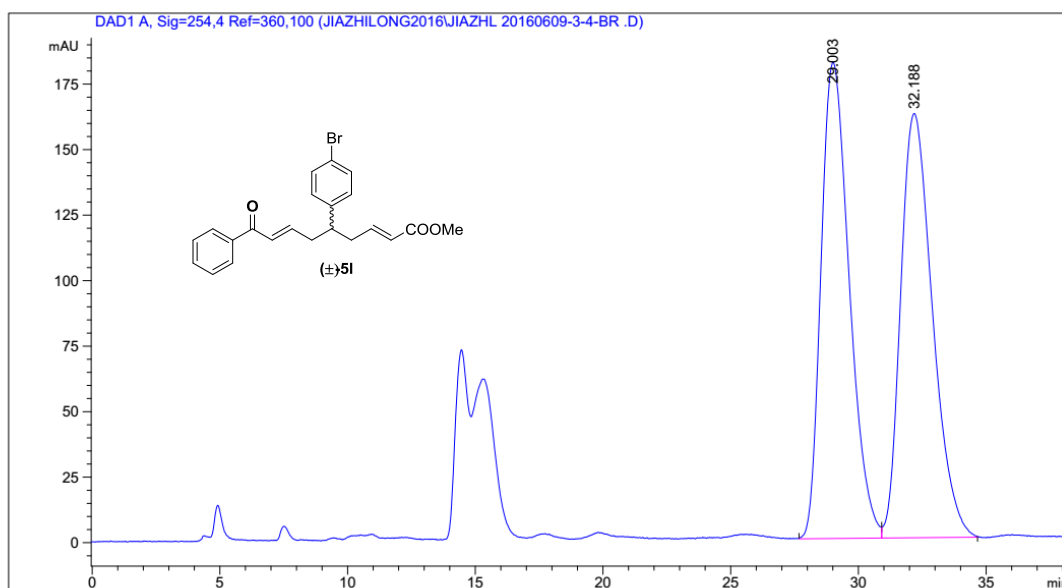

| Peak | Processed Channel | Retention Time (min) | Peak Area (mAU*s) | Peak Height (mAU) | Peak Area (%) |
|------|-------------------|----------------------|-------------------|-------------------|---------------|
| 1    | DAD 254, 4 nm     | 29.003               | 1.39707e4         | 181.81752         | 49.9643       |
| 2    | DAD 254, 4 nm     | 32.188               | 1.39906e4         | 161.89824         | 50.0357       |

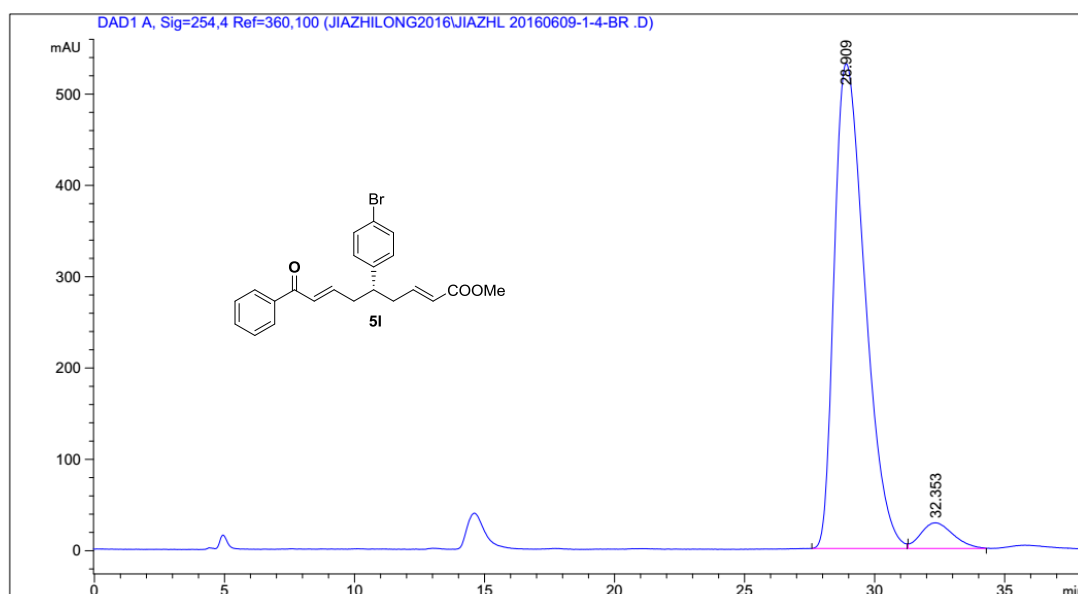

| Peak | Processed Channel | Retention Time (min) | Peak Area (mAU*s) | Peak Height (mAU) | Peak Area (%) |
|------|-------------------|----------------------|-------------------|-------------------|---------------|
| 1    | DAD 254, 4 nm     | 28.909               | 4.33440e4         | 531.00928         | 94.6963       |
| 2    | DAD 254, 4 nm     | 32.353               | 2427.56738        | 28.10785          | 5.3037        |

HPLC using an AS column (hexane: *i*-PrOH = 80:20, 1.0 mL/min)

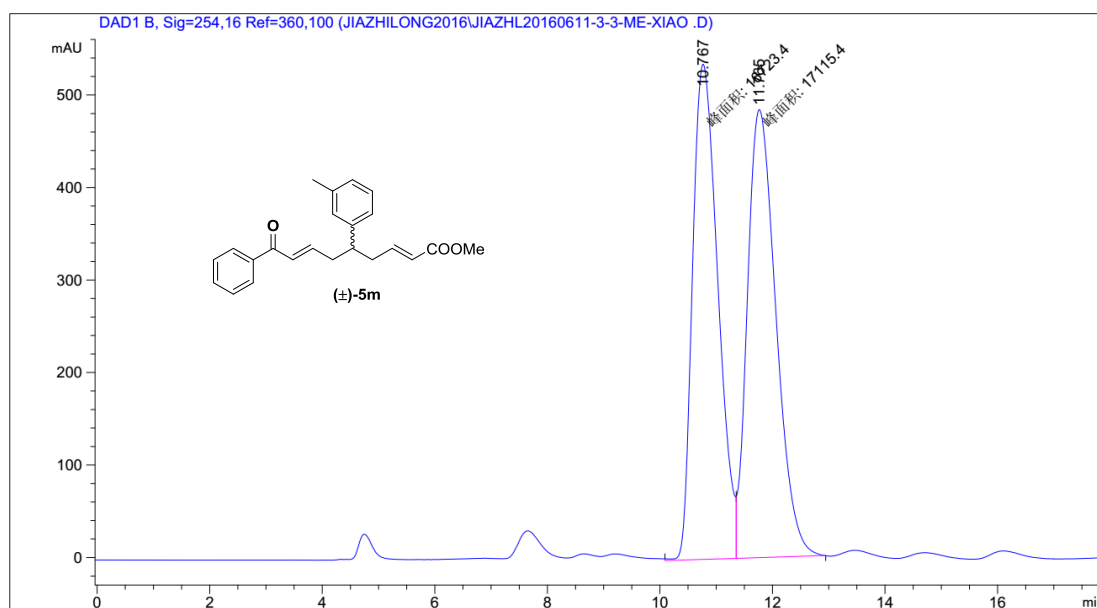

| Peak | Processed Channel | Retention Time (min) | Peak Area (mAU*s) | Peak Height (mAU) | Peak Area (%) |
|------|-------------------|----------------------|-------------------|-------------------|---------------|
| 1    | DAD 254, 16 nm    | 10.767               | 1.67234e4         | 535.32800         | 49.4207       |
| 2    | DAD 254, 16 nm    | 11.765               | 1.71154e4         | 484.28903         | 50.5793       |

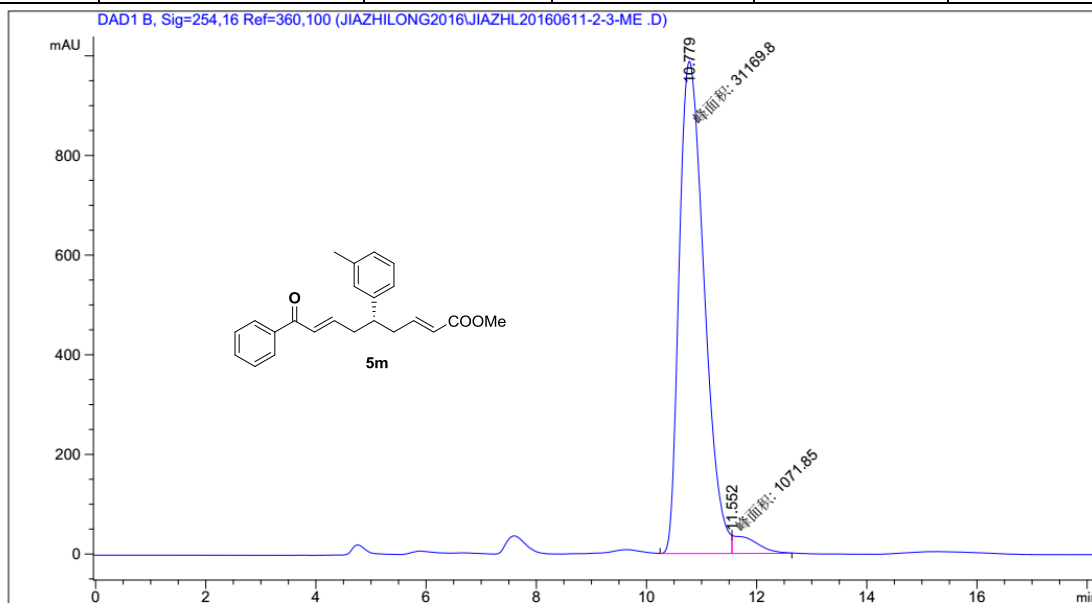

| Peak | Processed Channel | Retention Time (min) | Peak Area (mAU*s) | Peak Height (mAU) | Peak Area (%) |
|------|-------------------|----------------------|-------------------|-------------------|---------------|
| 1    | DAD 254, 16 nm    | 10.779               | 3.11698e4         | 987.84576         | 96.6756       |
| 2    | DAD 254, 16 nm    | 11.552               | 1071.84900        | 36.24280          | 3.3244        |

HPLC using an AD column (hexane: *i*-PrOH = 70:30, 1.0 mL/min)

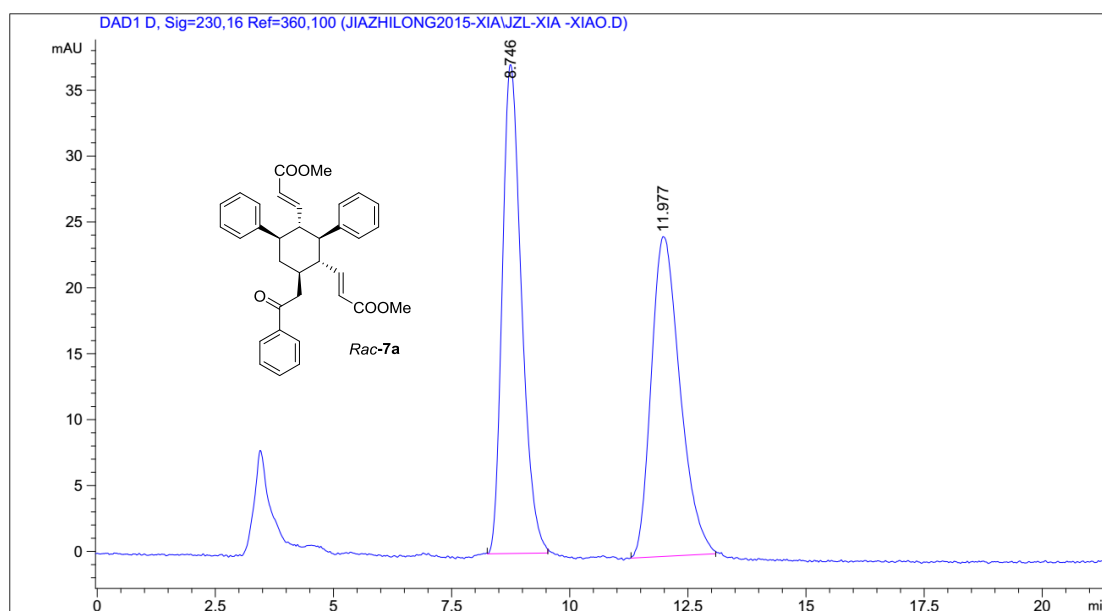

| Peak | Processed Channel | Retention Time (min) | Peak Area (mAU*s) | Peak Height (mAU) | Peak Area (%) |
|------|-------------------|----------------------|-------------------|-------------------|---------------|
| 1    | DAD 230, 16 nm    | 8.746                | 1048.69092        | 37.09874          | 50.5125       |
| 2    | DAD 230, 16 nm    | 11.977               | 1027.40991        | 24.26802          | 49.4875       |

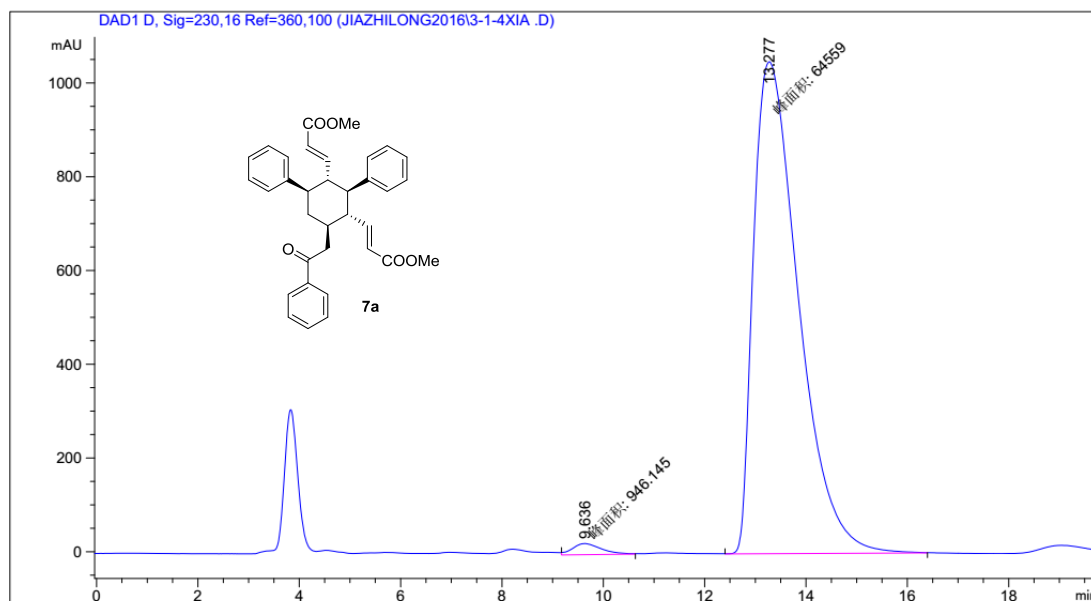

| Peak | Processed Channel | Retention Time (min) | Peak Area (mAU*s) | Peak Height (mAU) | Peak Area (%) |
|------|-------------------|----------------------|-------------------|-------------------|---------------|
| 1    | DAD 230, 16 nm    | 9.636                | 946.14496         | 23.83072          | 1.4444        |
| 2    | DAD 230, 16 nm    | 13.277               | 6.45590e4         | 1049.38318        | 98.5556       |

HPLC using an AD column (hexane: *i*-PrOH = 70:30, 1.0 mL/min)

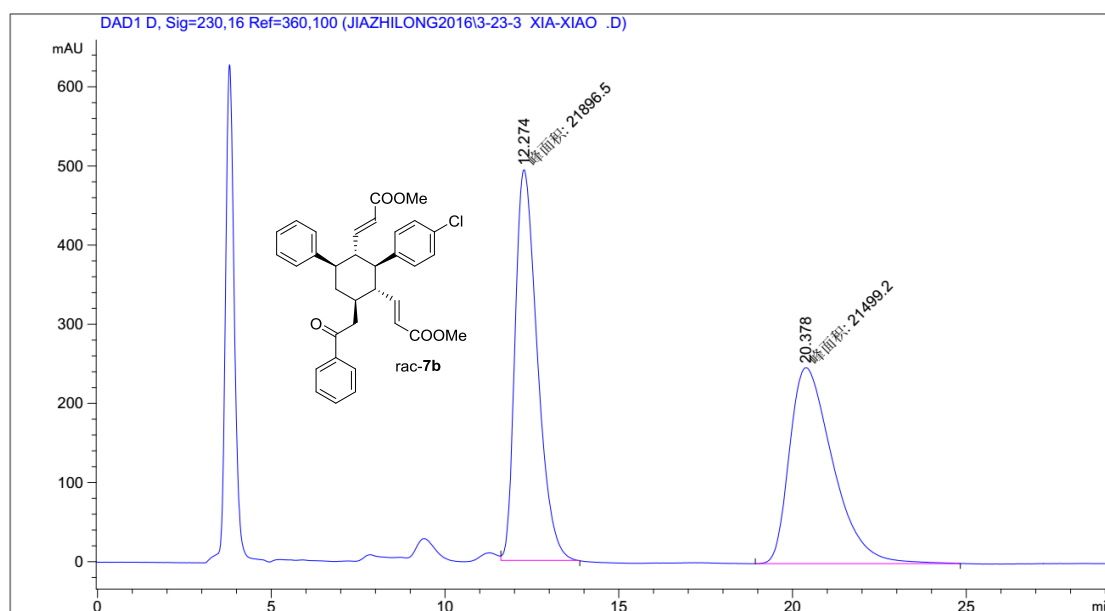

| Peak | Processed Channel | Retention Time (min) | Peak Area (mAU*s) | Peak Height (mAU) | Peak Area (%) |
|------|-------------------|----------------------|-------------------|-------------------|---------------|
| 1    | DAD 230, 16 nm    | 12.274               | 2.18965e4         | 493.51340         | 50.4578       |
| 2    | DAD 230, 16 nm    | 20.378               | 2.14992e4         | 247.50015         | 49.5422       |

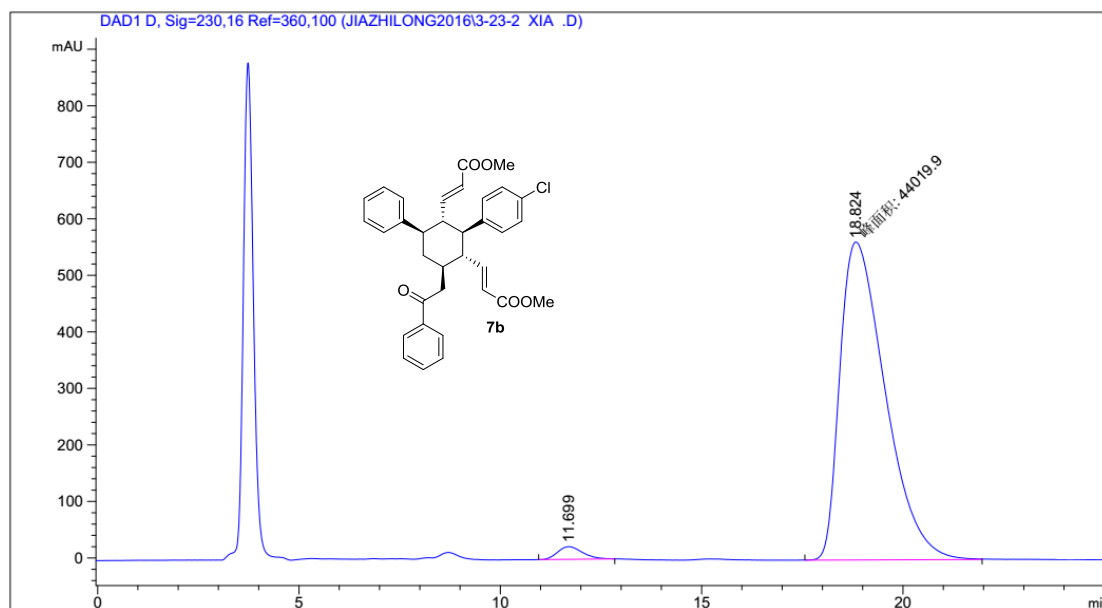

| Peak | Processed Channel | Retention Time (min) | Peak Area (mAU*s) | Peak Height (mAU) | Peak Area (%) |
|------|-------------------|----------------------|-------------------|-------------------|---------------|
| 1    | DAD 230, 16 nm    | 11.699               | 970.12482         | 22.45220          | 2.1563        |
| 2    | DAD 230, 16 nm    | 18.824               | 4.40199e4         | 562.49994         | 97.8437       |



HPLC using an AD column (hexane: *i*-PrOH = 70:30, 1.0 mL/min)

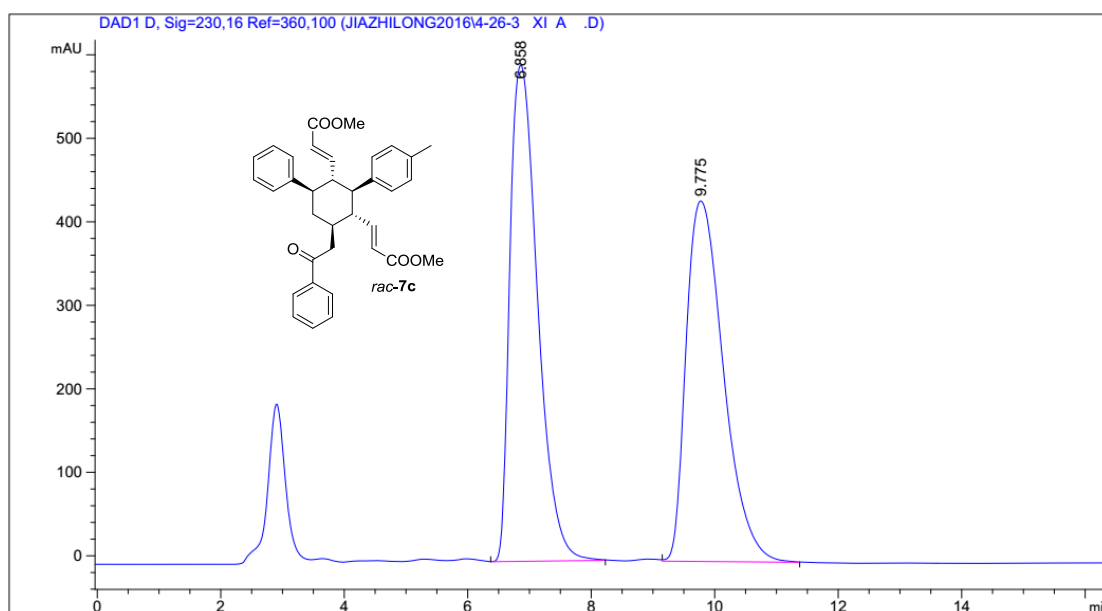

| Peak | Processed Channel | Retention Time (min) | Peak Area (mAU*s) | Peak Height (mAU) | Peak Area (%) |
|------|-------------------|----------------------|-------------------|-------------------|---------------|
| 1    | DAD 230, 16 nm    | 6.858                | 1.84747e4         | 594.32758         | 50.4768       |
| 2    | DAD 230, 16 nm    | 9.775                | 1.81257e4         | 431.72662         | 49.5232       |

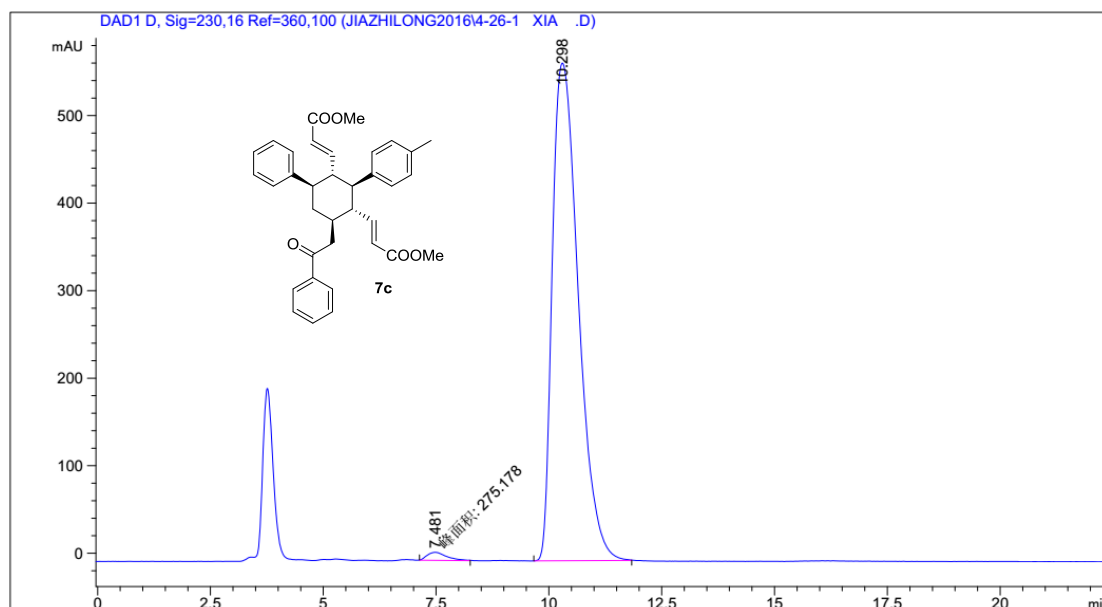

| Peak | Processed Channel | Retention Time (min) | Peak Area (mAU*s) | Peak Height (mAU) | Peak Area (%) |
|------|-------------------|----------------------|-------------------|-------------------|---------------|
| 1    | DAD 230, 16 nm    | 7.481                | 275.17828         | 9.15802           | 1.1946        |
| 2    | DAD 230, 16 nm    | 10.298               | 2.27591e4         | 568.62335         | 98.8054       |

HPLC using an AD column (hexane: *i*-PrOH = 70:30, 1.0 mL/min)

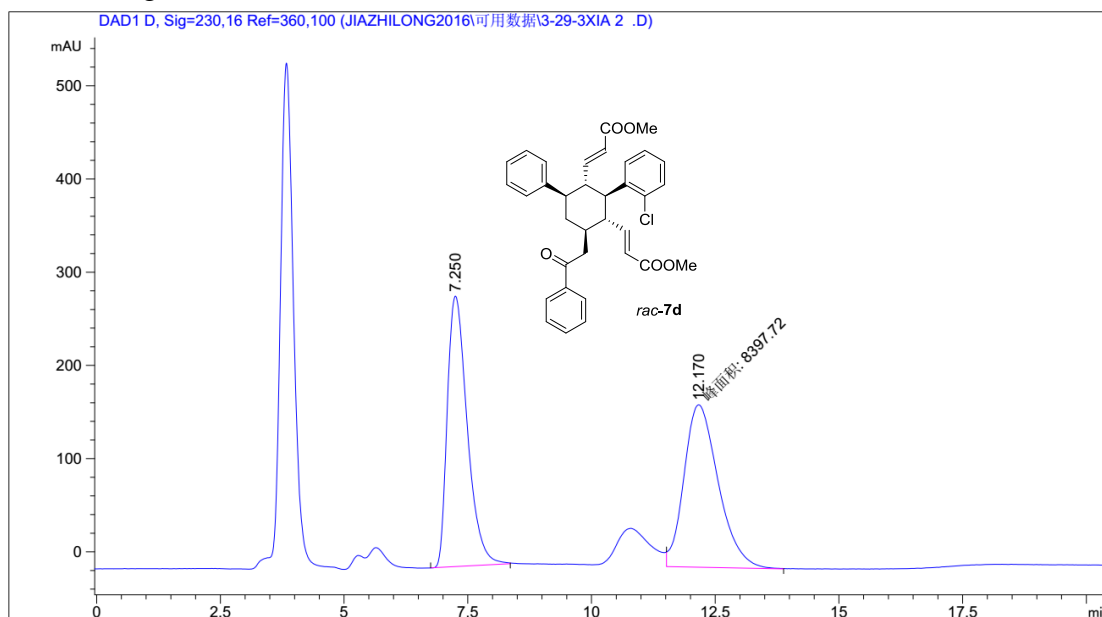

| Peak | Processed Channel | Retention Time (min) | Peak Area (mAU*s) | Peak Height (mAU) | Peak Area (%) |
|------|-------------------|----------------------|-------------------|-------------------|---------------|
| 1    | DAD 230, 16 nm    | 7.250                | 8129.36377        | 290.16644         | 49.1881       |
| 2    | DAD 230, 16 nm    | 12.170               | 8397.72363        | 174.19775         | 50.8119       |

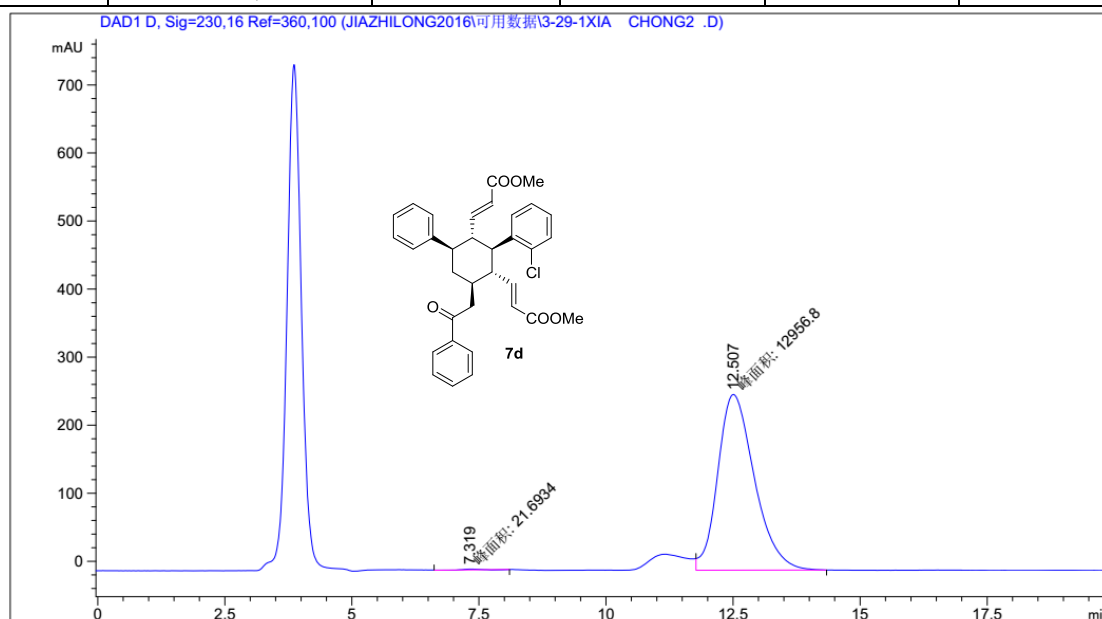

| Peak | Processed Channel | Retention Time (min) | Peak Area (mAU*s) | Peak Height (mAU) | Peak Area (%) |
|------|-------------------|----------------------|-------------------|-------------------|---------------|
| 1    | DAD 230, 16 nm    | 7.319                | 21.69337          | 1.08856           | 0.1672        |
| 2    | DAD 230, 16 nm    | 12.507               | 1.29568e4         | 258.33707         | 99.8328       |

HPLC using an AD column (hexane: *i*-PrOH = 70:30, 1.0 mL/min)

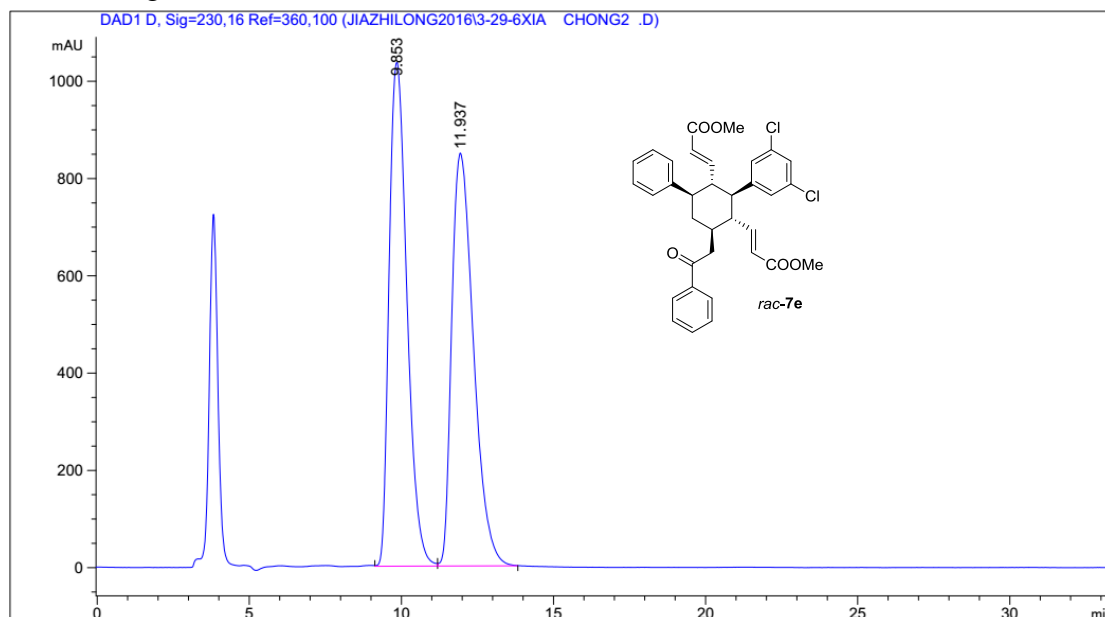

| Peak | Processed Channel | Retention Time (min) | Peak Area (mAU*s) | Peak Height (mAU) | Peak Area (%) |
|------|-------------------|----------------------|-------------------|-------------------|---------------|
| 1    | DAD 230, 16 nm    | 9.853                | 4.20913e4         | 1035.35217        | 49.9621       |
| 2    | DAD 230, 16 nm    | 11.937               | 4.21552e4         | 848.90930         | 50.0379       |

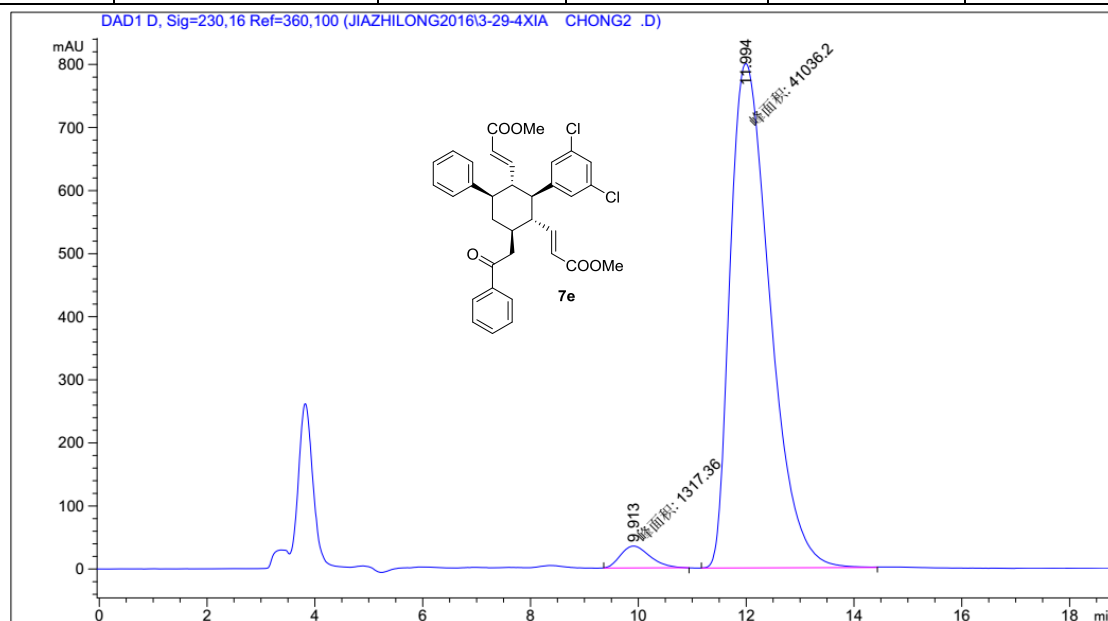

| Peak | Processed Channel | Retention Time (min) | Peak Area (mAU*s) | Peak Height (mAU) | Peak Area (%) |
|------|-------------------|----------------------|-------------------|-------------------|---------------|
| 1    | DAD 230, 16 nm    | 9.913                | 1317.35828        | 34.80242          | 3.1104        |
| 2    | DAD 230, 16 nm    | 11.994               | 4.10362e4         | 799.49957         | 96.8896       |

HPLC using an AD column (hexane: *i*-PrOH = 70:30, 1.0 mL/min)

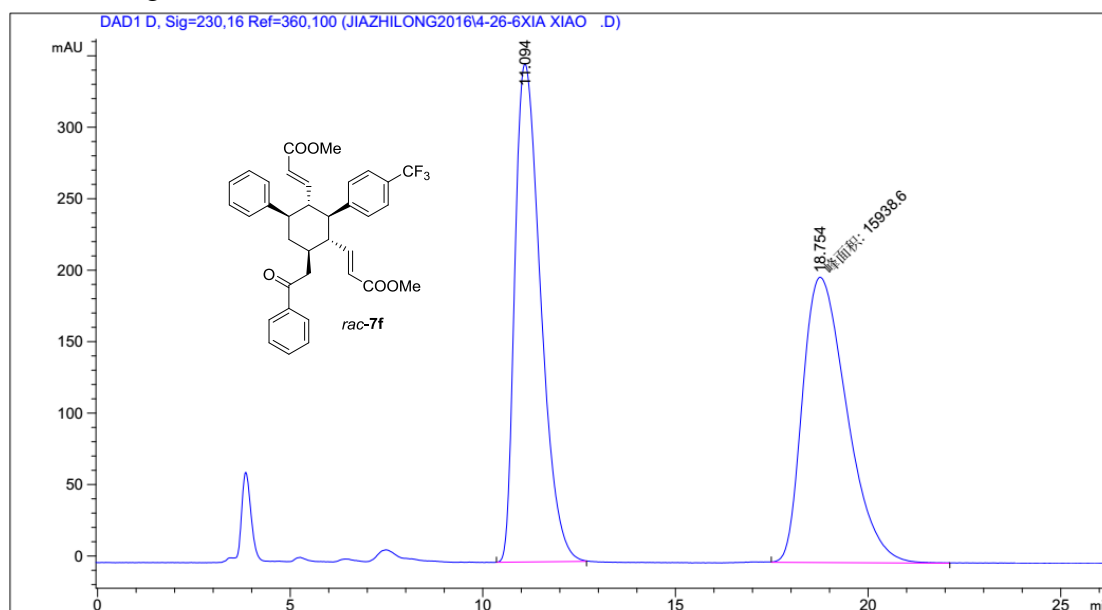

| Peak | Processed Channel | Retention Time (min) | Peak Area (mAU*s) | Peak Height (mAU) | Peak Area (%) |
|------|-------------------|----------------------|-------------------|-------------------|---------------|
| 1    | DAD 230, 16 nm    | 11.094               | 1.61838e4         | 348.39716         | 50.3817       |
| 2    | DAD 230, 16 nm    | 18.754               | 1.59386e4         | 199.63060         | 49.6183       |

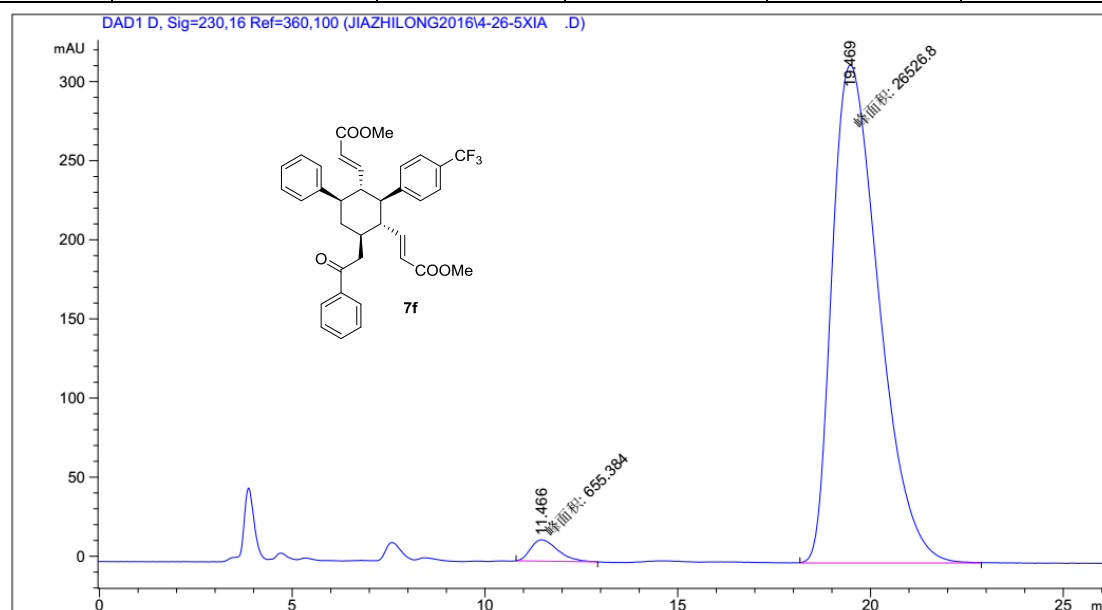

| Peak | Processed Channel | Retention Time (min) | Peak Area (mAU*s) | Peak Height (mAU) | Peak Area (%) |
|------|-------------------|----------------------|-------------------|-------------------|---------------|
| 1    | DAD 230, 16 nm    | 11.466               | 655.38385         | 13.49150          | 2.4111        |
| 2    | DAD 230, 16 nm    | 19.469               | 2.65268e4         | 314.56116         | 97.5889       |

HPLC using an AD column (hexane: *i*-PrOH = 70:30, 1.0 mL/min)

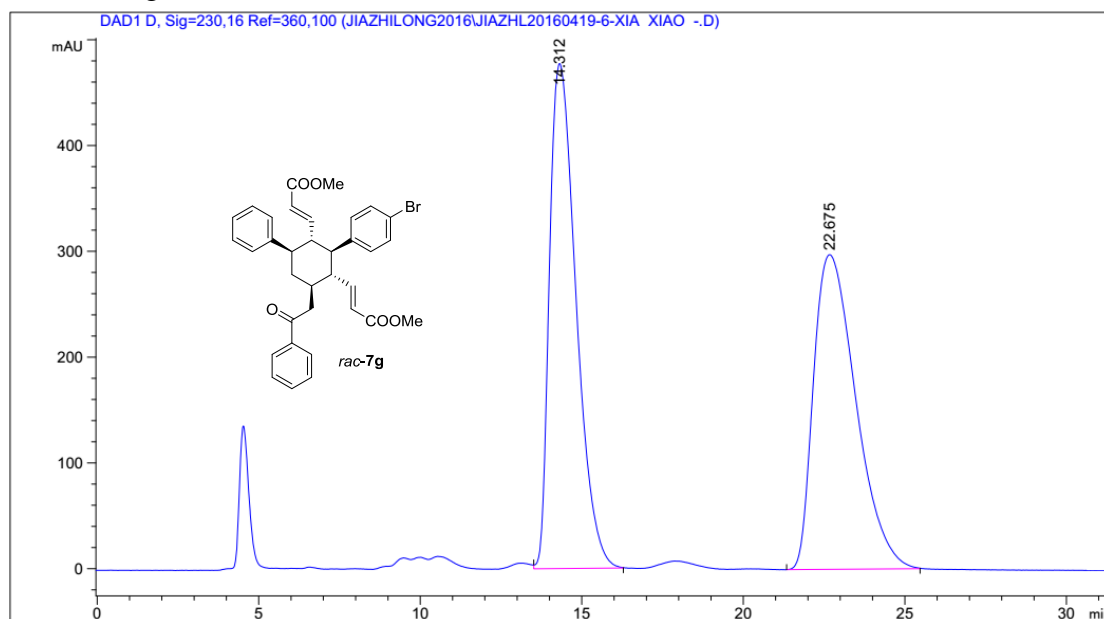

| Peak | Processed Channel | Retention Time (min) | Peak Area (mAU*s) | Peak Height (mAU) | Peak Area (%) |
|------|-------------------|----------------------|-------------------|-------------------|---------------|
| 1    | DAD 230, 16 nm    | 14.312               | 2.72915e4         | 477.50385         | 50.2361       |
| 2    | DAD 230, 16 nm    | 22.675               | 2.70350e4         | 297.45288         | 49.7639       |

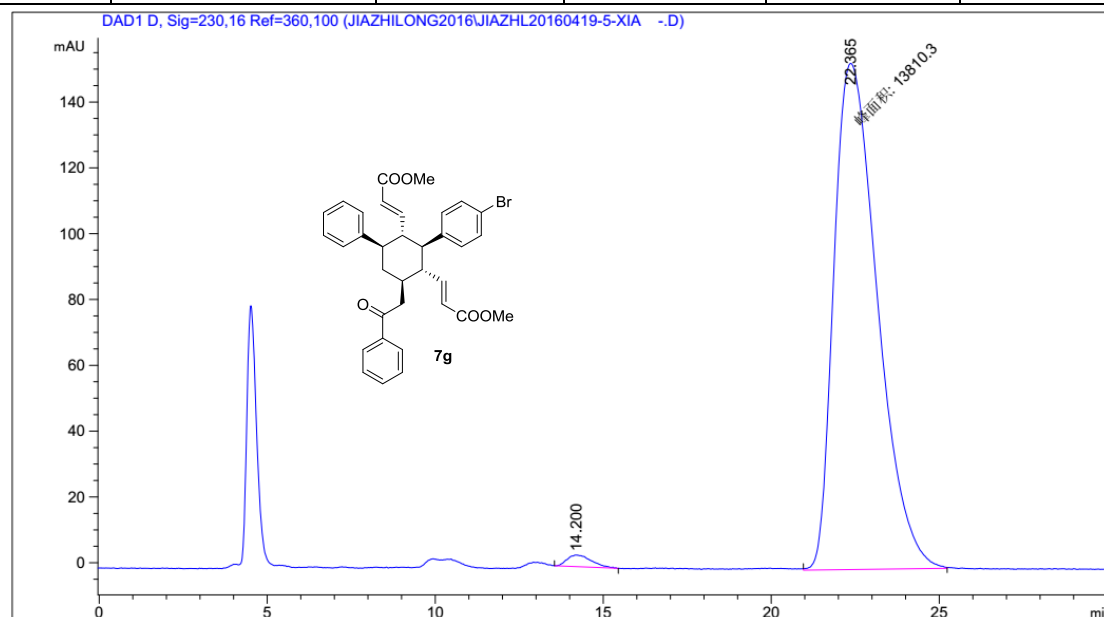

| Peak | Processed Channel | Retention Time (min) | Peak Area (mAU*s) | Peak Height (mAU) | Peak Area (%) |
|------|-------------------|----------------------|-------------------|-------------------|---------------|
| 1    | DAD 230, 16 nm    | 14.200               | 178.43895         | 3.52076           | 1.2756        |
| 2    | DAD 230, 16 nm    | 22.365               | 1.38103e4         | 153.80035         | 98.7244       |

HPLC using an AD column (hexane: *i*-PrOH = 70:30, 1.0 mL/min)

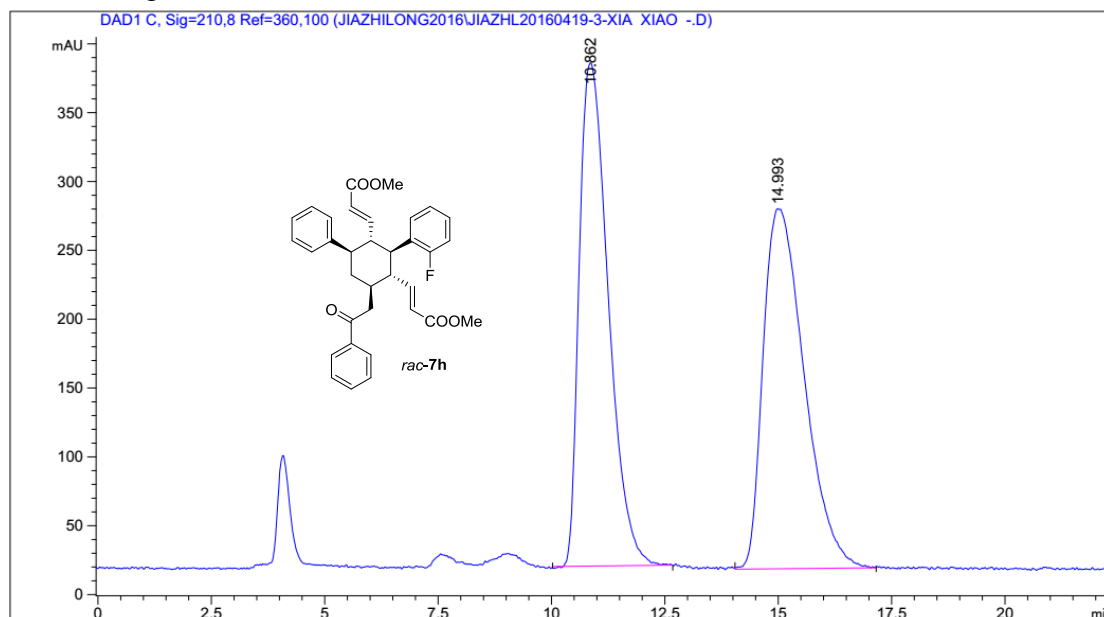

| Peak | Processed Channel | Retention Time (min) | Peak Area (mAU*s) | Peak Height (mAU) | Peak Area (%) |
|------|-------------------|----------------------|-------------------|-------------------|---------------|
| 1    | DAD 210, 8 nm     | 10.862               | 1.62601e4         | 365.66080         | 49.7116       |
| 2    | DAD 210, 8 nm     | 14.993               | 1.64488e4         | 261.53769         | 50.2884       |

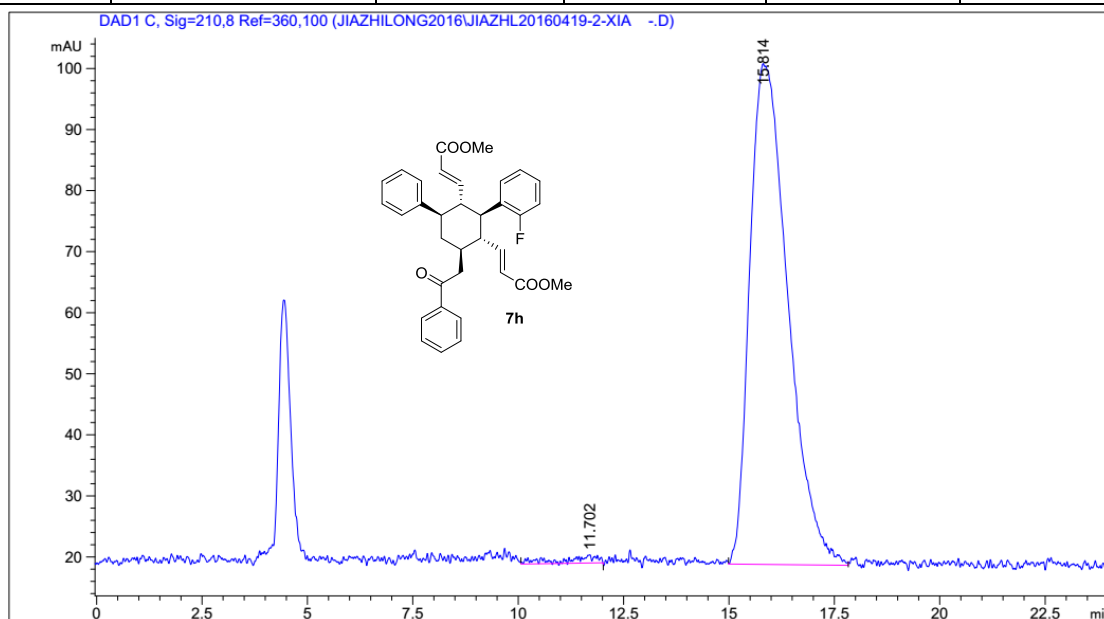

| Peak | Processed Channel | Retention Time (min) | Peak Area (mAU*s) | Peak Height (mAU) | Peak Area (%) |
|------|-------------------|----------------------|-------------------|-------------------|---------------|
| 1    | DAD 210, 8 nm     | 11.702               | 66.57973          | 1.35086           | 1.2734        |
| 2    | DAD 210, 8 nm     | 15.814               | 5161.90137        | 82.04559          | 98.7266       |

HPLC using an AD column (hexane: *i*-PrOH = 70:30, 1.0 mL/min)

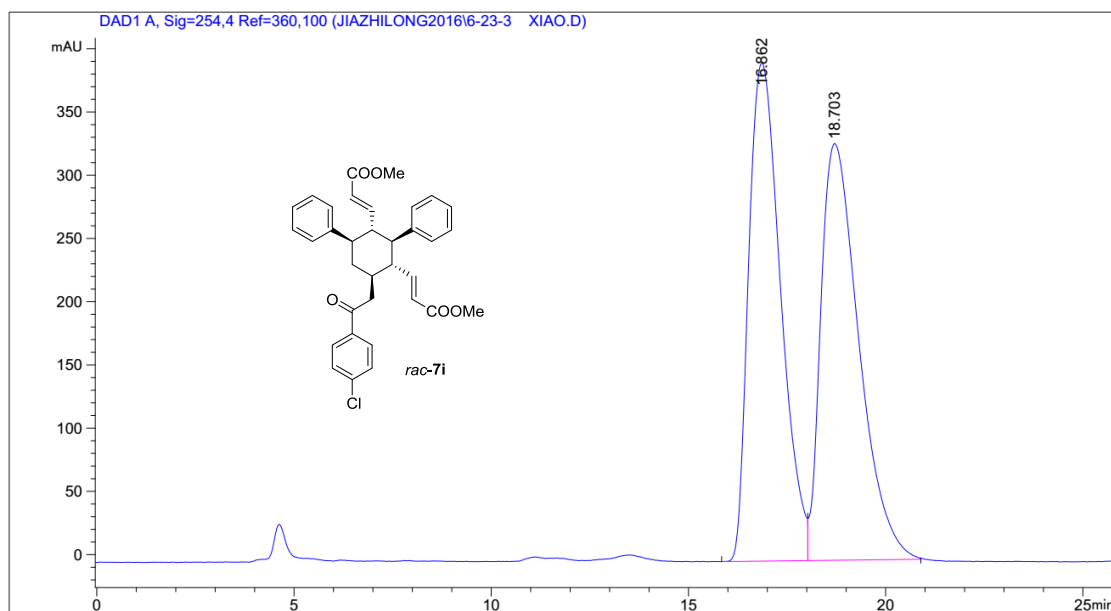

| Peak | Processed Channel | Retention Time (min) | Peak Area (mAU*s) | Peak Height (mAU) | Peak Area (%) |
|------|-------------------|----------------------|-------------------|-------------------|---------------|
| 1    | DAD 254, 4 nm     | 16.862               | 2.22083e4         | 393.87048         | 50.1479       |
| 2    | DAD 254, 4 nm     | 18.703               | 2.20773e4         | 329.58698         | 49.8521       |

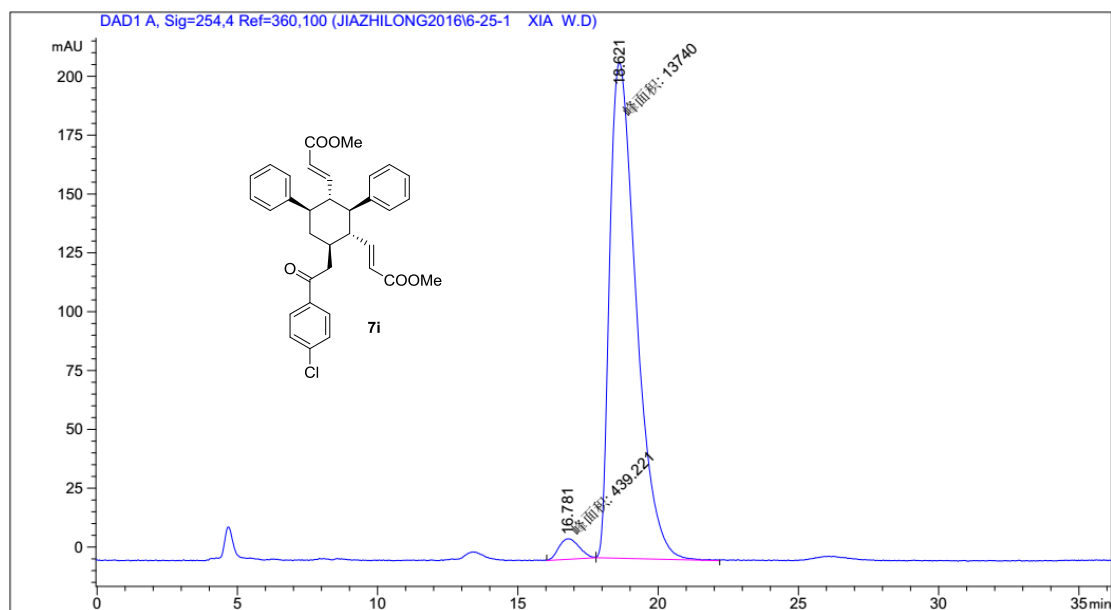

| Peak | Processed Channel | Retention Time (min) | Peak Area (mAU*s) | Peak Height (mAU) | Peak Area (%) |
|------|-------------------|----------------------|-------------------|-------------------|---------------|
| 1    | DAD 254, 4 nm     | 16.781               | 439.22089         | 8.70777           | 3.0976        |
| 2    | DAD 254, 4 nm     | 18.621               | 1.37400e4         | 210.42262         | 96.9024       |

HPLC using an AD column (hexane: *i*-PrOH = 70:30, 1.0 mL/min)

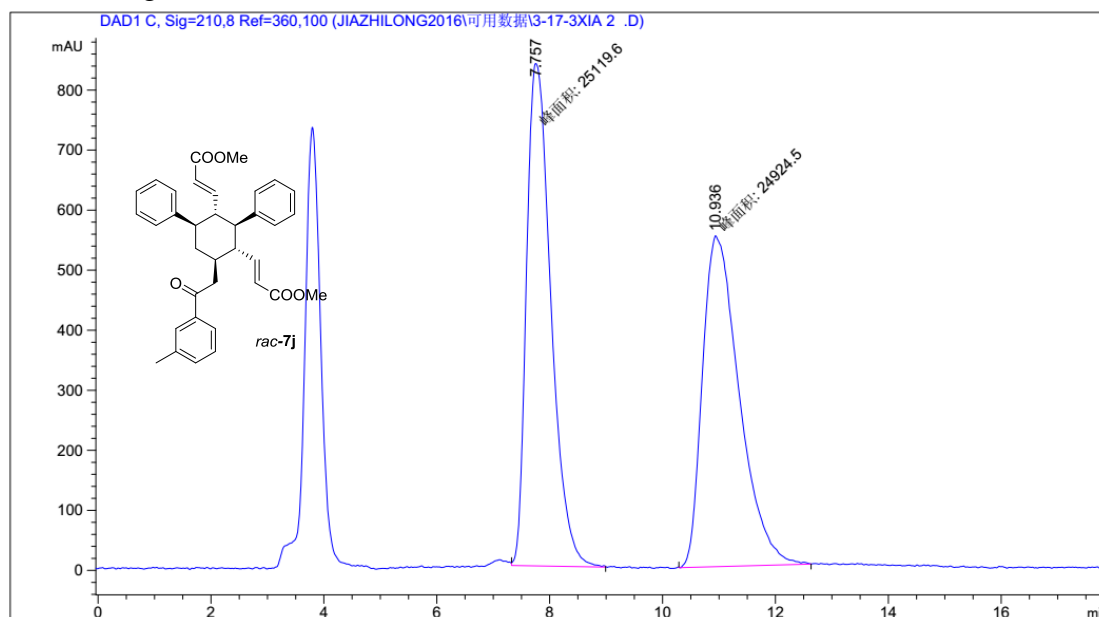

| Peak | Processed Channel | Retention Time (min) | Peak Area (mAU*s) | Peak Height (mAU) | Peak Area (%) |
|------|-------------------|----------------------|-------------------|-------------------|---------------|
| 1    | DAD 210, 8 nm     | 7.757                | 2.51196e4         | 836.81396         | 50.1949       |
| 2    | DAD 210, 8 nm     | 10.936               | 2.49245e4         | 551.32385         | 49.8051       |

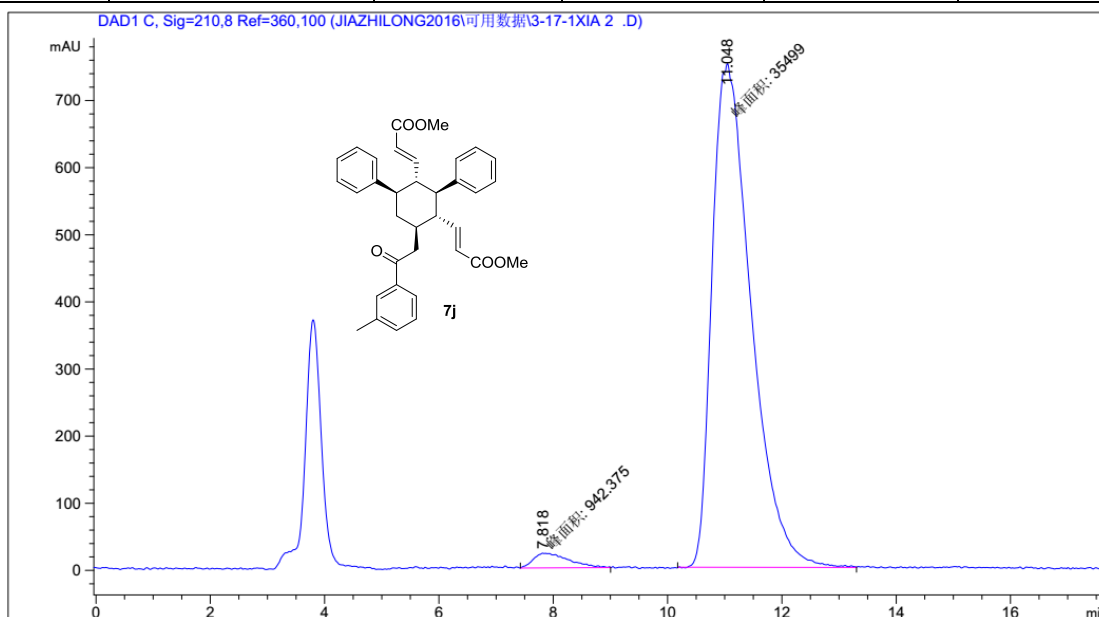

| Peak | Processed Channel | Retention Time (min) | Peak Area (mAU*s) | Peak Height (mAU) | Peak Area (%) |
|------|-------------------|----------------------|-------------------|-------------------|---------------|
| 1    | DAD 210, 8 nm     | 7.818                | 942.37524         | 21.96951          | 2.5860        |
| 2    | DAD 210, 8 nm     | 11.048               | 3.54990e4         | 750.54181         | 97.4140       |



HPLC using an AD column (hexane: *i*-PrOH = 70:30, 1.0 mL/min)

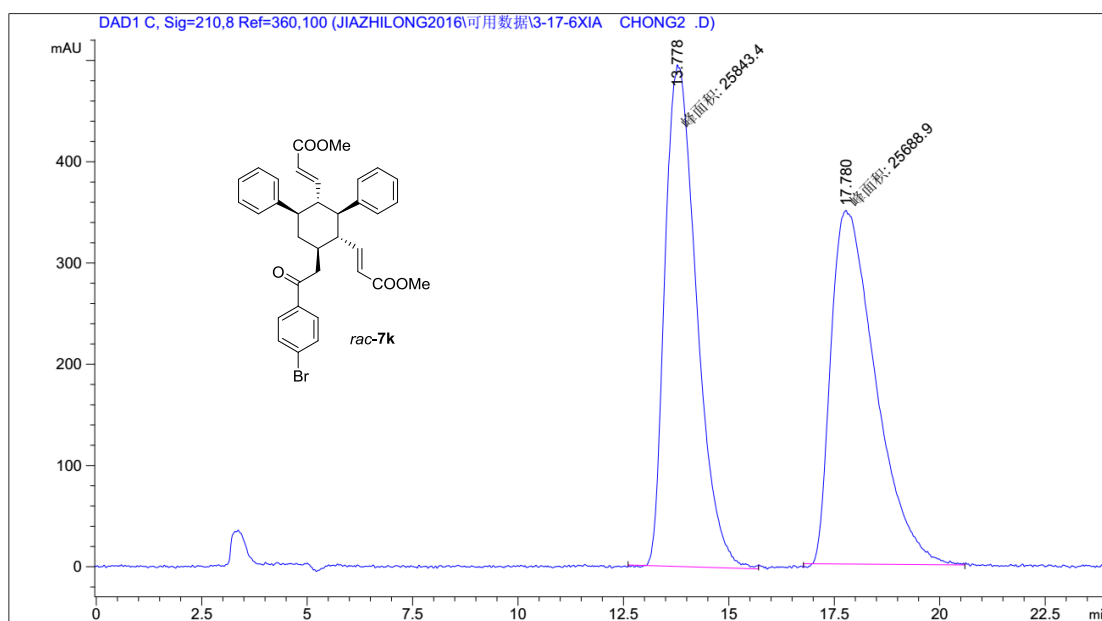

| Peak | Processed Channel | Retention Time (min) | Peak Area (mAU*s) | Peak Height (mAU) | Peak Area (%) |
|------|-------------------|----------------------|-------------------|-------------------|---------------|
| 1    | DAD 210, 8 nm     | 13.778               | 2.58434e4         | 495.59573         | 50.1499       |
| 2    | DAD 210, 8 nm     | 17.780               | 2.56889e4         | 349.41125         | 49.8501       |

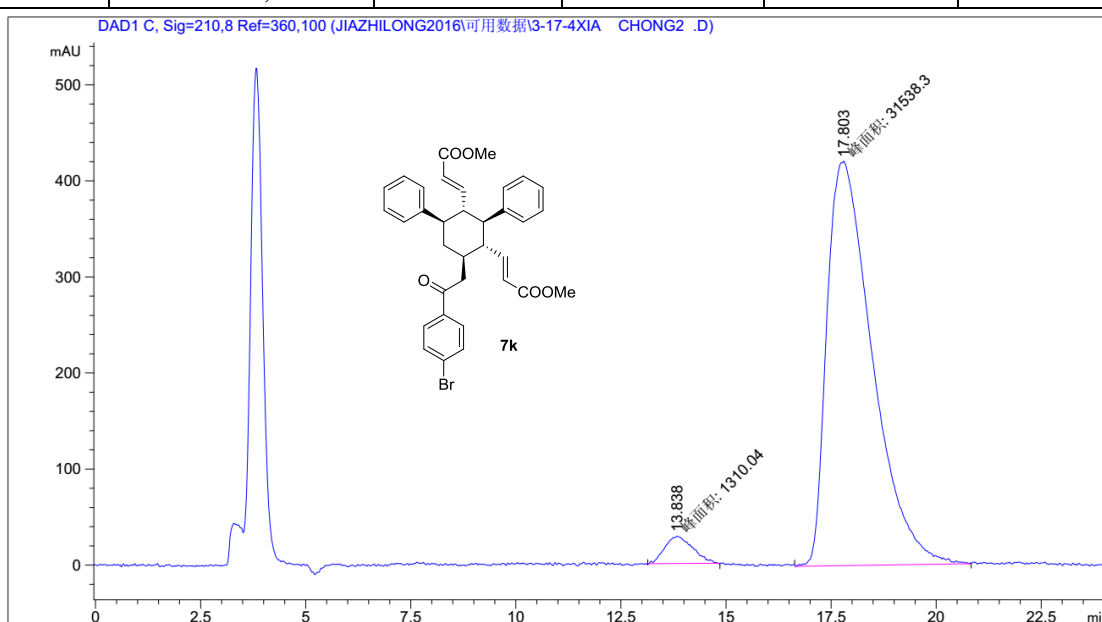

| Peak | Processed Channel | Retention Time (min) | Peak Area (mAU*s) | Peak Height (mAU) | Peak Area (%) |
|------|-------------------|----------------------|-------------------|-------------------|---------------|
| 1    | DAD 210, 8 nm     | 13.838               | 1310.04456        | 28.50111          | 3.9882        |
| 2    | DAD 210, 8 nm     | 17.803               | 3.15383e4         | 421.07962         | 96.0118       |

HPLC using an OD column (hexane: *i*-PrOH = 70:30, 1.0 mL/min)

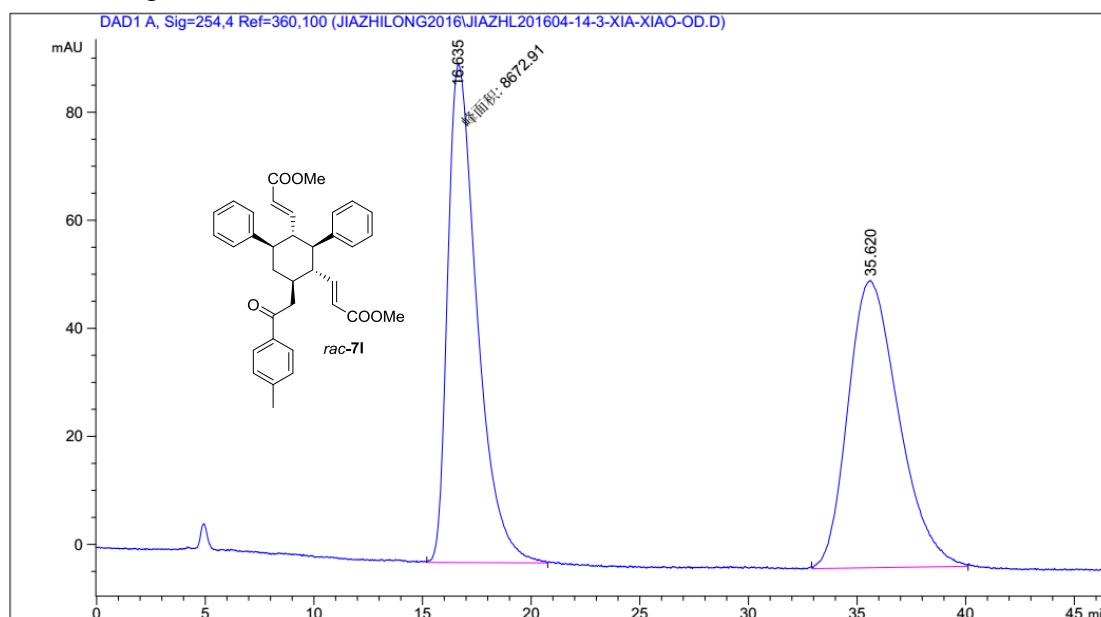

| Peak | Processed Channel | Retention Time (min) | Peak Area (mAU*s) | Peak Height (mAU) | Peak Area (%) |
|------|-------------------|----------------------|-------------------|-------------------|---------------|
| 1    | DAD 254, 4 nm     | 16.635               | 8672.90527        | 92.16481          | 50.1836       |
| 2    | DAD 254, 4 nm     | 35.620               | 8609.45410        | 53.17858          | 49.8164       |

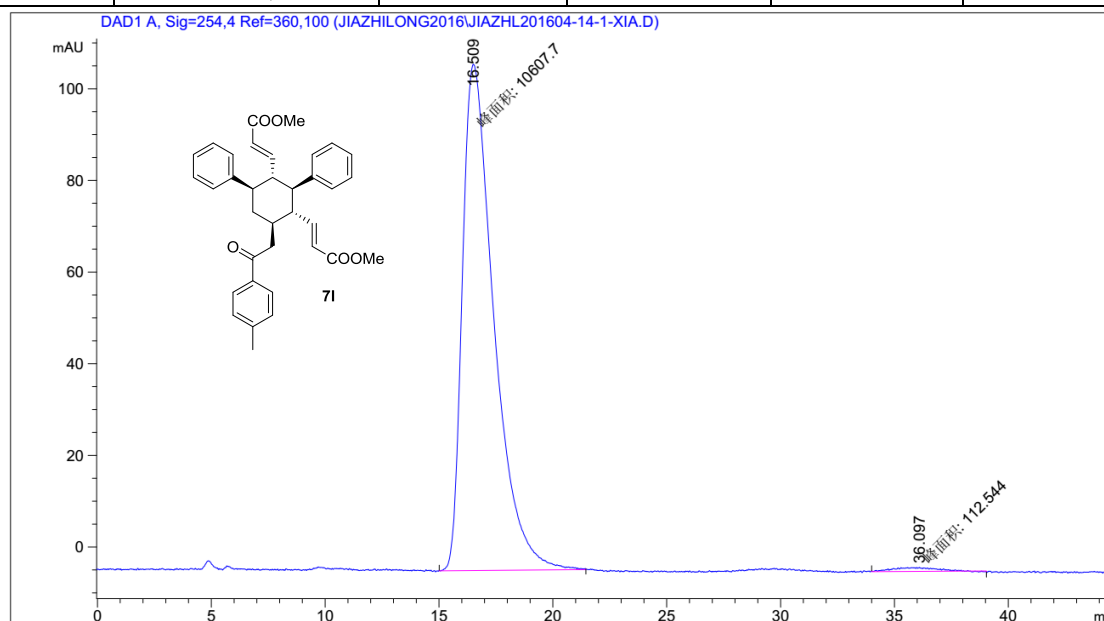

| Peak | Processed Channel | Retention Time (min) | Peak Area (mAU*s) | Peak Height (mAU) | Peak Area (%) |
|------|-------------------|----------------------|-------------------|-------------------|---------------|
| 1    | DAD 254, 4 nm     | 16.509               | 1.06077e4         | 110.49479         | 98.9502       |
| 2    | DAD 254, 4 nm     | 36.097               | 112.54442         | 8.74923e-1        | 1.0498        |

HPLC using an OD column (hexane: *i*-PrOH = 70:30, 1.0 mL/min)

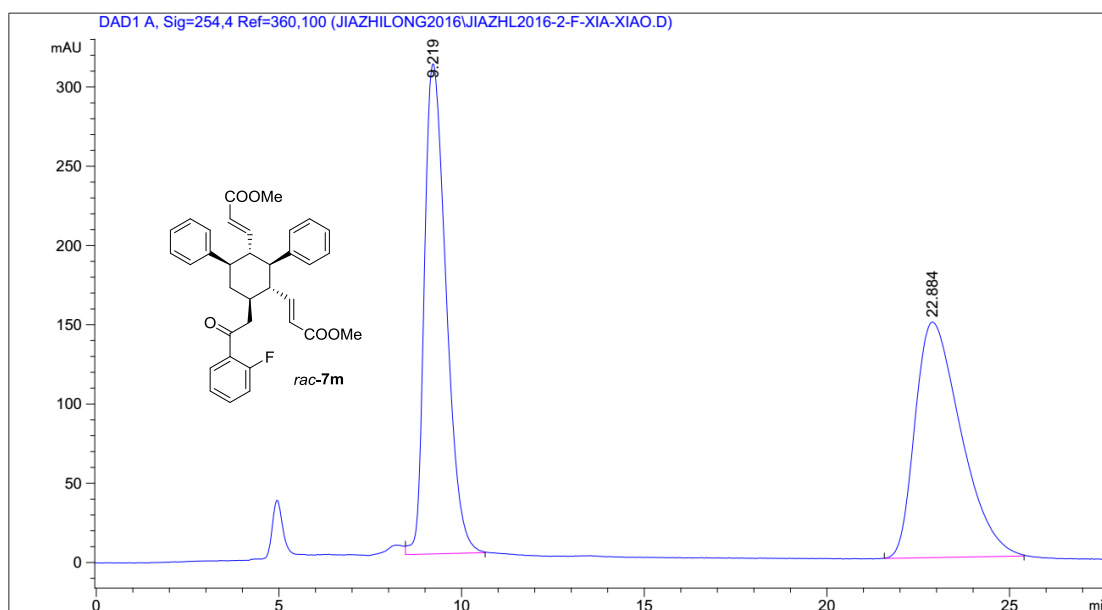

| Peak | Processed Channel | Retention Time (min) | Peak Area (mAU*s) | Peak Height (mAU) | Peak Area (%) |
|------|-------------------|----------------------|-------------------|-------------------|---------------|
| 1    | DAD 254, 4 nm     | 9.219                | 1.27589e4         | 309.13327         | 49.6295       |
| 2    | DAD 254, 4 nm     | 22.884               | 1.29494e4         | 148.70950         | 50.3705       |

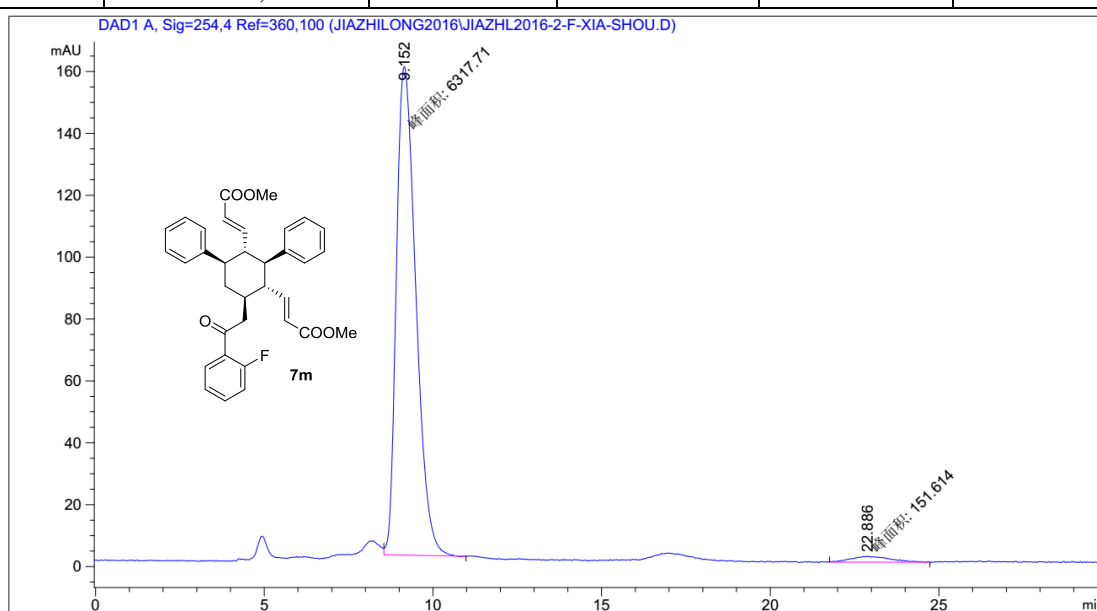

| Peak | Processed Channel | Retention Time (min) | Peak Area (mAU*s) | Peak Height (mAU) | Peak Area (%) |
|------|-------------------|----------------------|-------------------|-------------------|---------------|
| 1    | DAD 254, 4 nm     | 9.152                | 6317.70605        | 157.86595         | 97.6564       |
| 2    | DAD 254, 4 nm     | 22.886               | 151.61403         | 1.91411           | 2.3436        |

HPLC using an AD column (hexane: *i*-PrOH = 70:30, 1.0 mL/min)

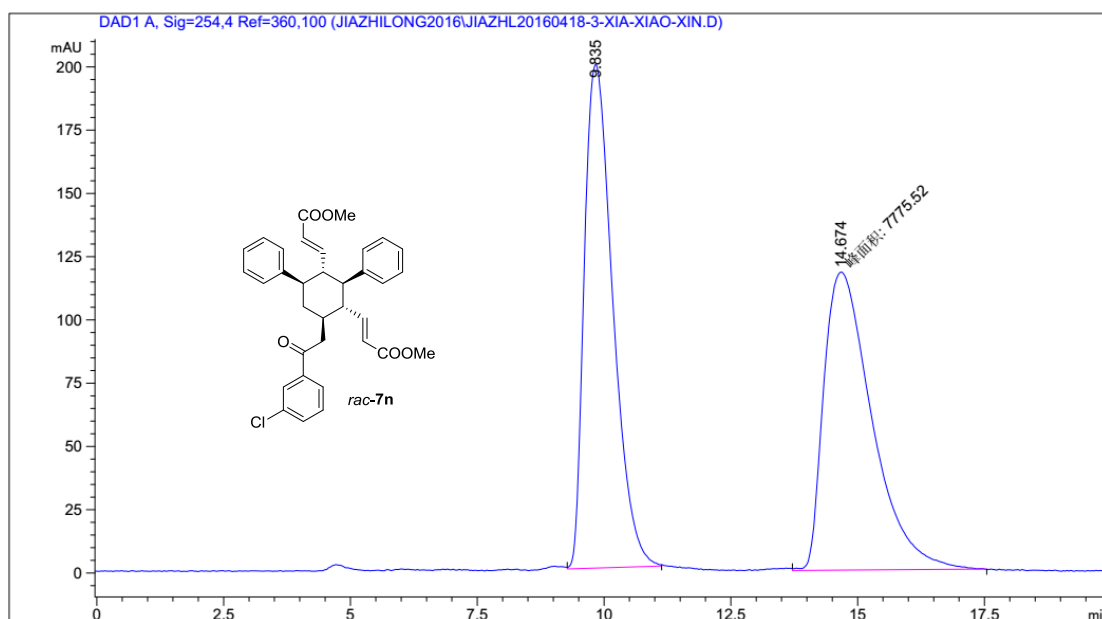

| Peak | Processed Channel | Retention Time (min) | Peak Area (mAU*s) | Peak Height (mAU) | Peak Area (%) |
|------|-------------------|----------------------|-------------------|-------------------|---------------|
| 1    | DAD 254, 4 nm     | 9.835                | 7782.63037        | 198.95479         | 50.0229       |
| 2    | DAD 254, 4 nm     | 14.674               | 7775.52002        | 117.77306         | 49.9771       |

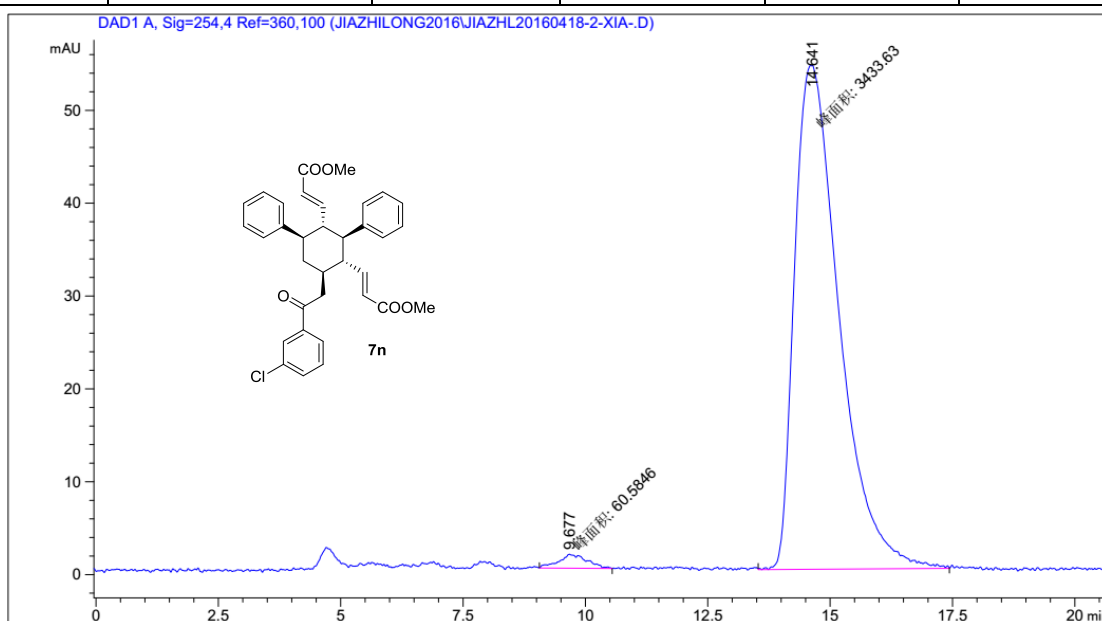

| Peak | Processed Channel | Retention Time (min) | Peak Area (mAU*s) | Peak Height (mAU) | Peak Area (%) |
|------|-------------------|----------------------|-------------------|-------------------|---------------|
| 1    | DAD 254, 4 nm     | 9.677                | 60.58463          | 1.50757           | 1.7339        |
| 2    | DAD 254, 4 nm     | 14.641               | 3433.63013        | 54.26755          | 98.2661       |

HPLC using an AD column (hexane: *i*-PrOH = 80:20, 1.0 mL/min)

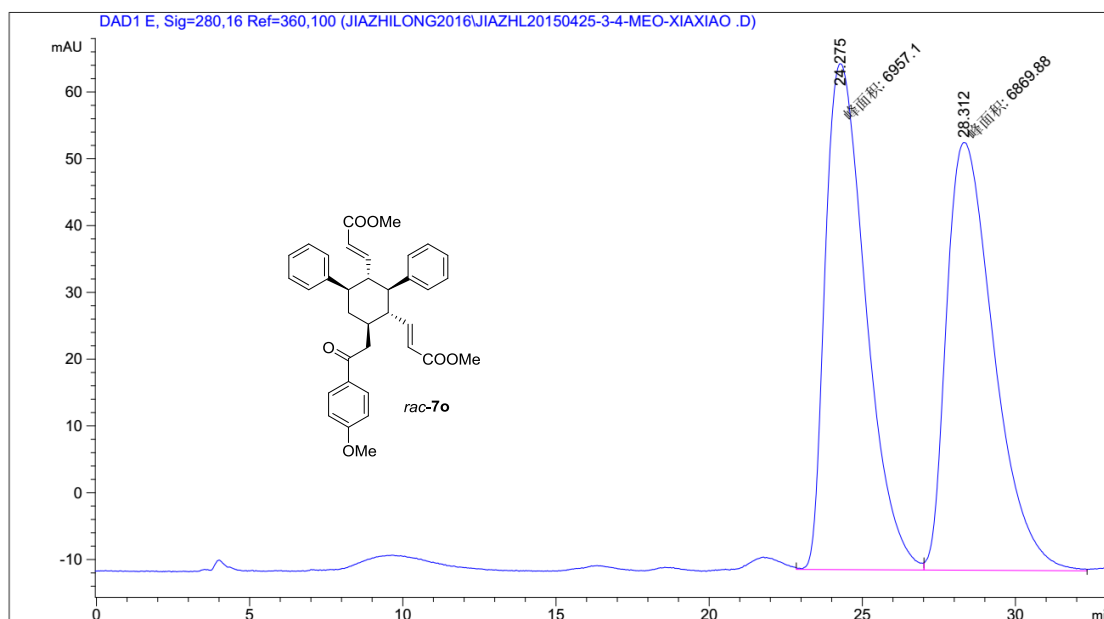

| Peak | Processed Channel | Retention Time (min) | Peak Area (mAU*s) | Peak Height (mAU) | Peak Area (%) |
|------|-------------------|----------------------|-------------------|-------------------|---------------|
| 1    | DAD 280, 16 nm    | 24.275               | 6957.09570        | 75.75133          | 50.3154       |
| 2    | DAD 280, 16 nm    | 28.312               | 6869.87598        | 64.03755          | 49.6846       |

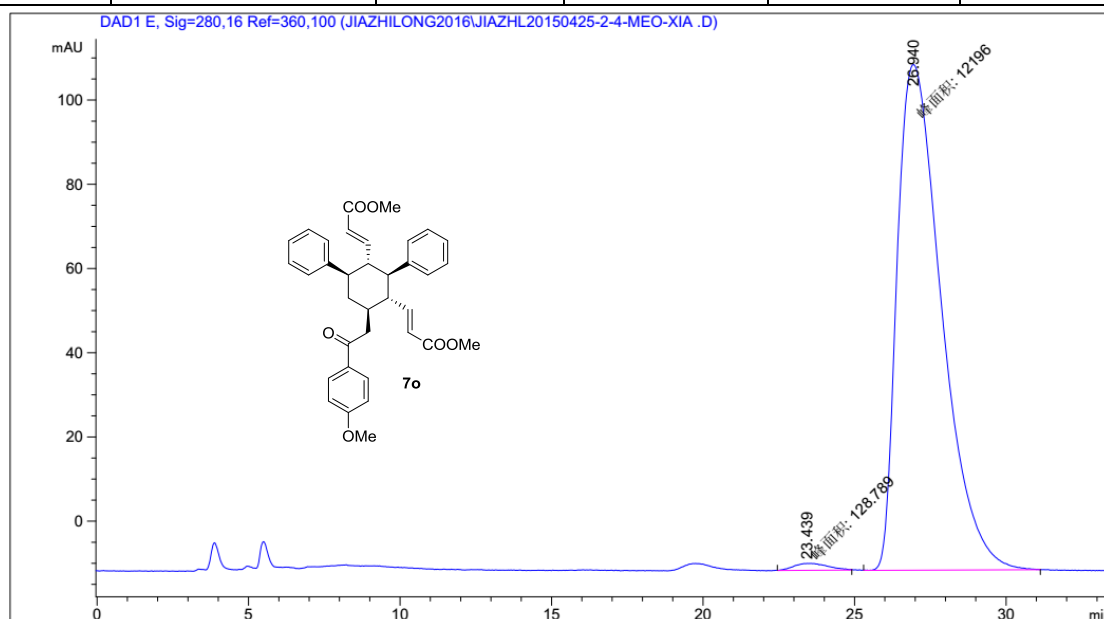

| Peak | Processed Channel | Retention Time (min) | Peak Area (mAU*s) | Peak Height (mAU) | Peak Area (%) |
|------|-------------------|----------------------|-------------------|-------------------|---------------|
| 1    | DAD 280, 16 nm    | 23.439               | 128.78914         | 1.65331           | 1.0450        |
| 2    | DAD 280, 16 nm    | 26.940               | 1.21960e4         | 120.09196         | 98.9550       |

HPLC using an AD column (hexane: *i*-PrOH = 80:20, 1.0 mL/min)

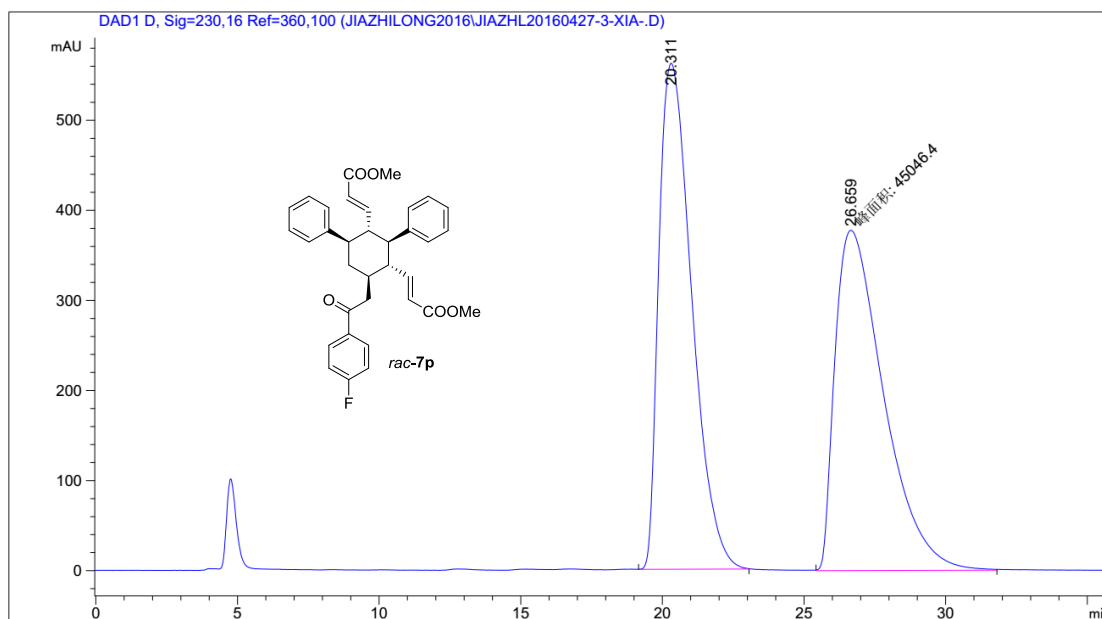

| Peak | Processed Channel | Retention Time (min) | Peak Area (mAU*s) | Peak Height (mAU) | Peak Area (%) |
|------|-------------------|----------------------|-------------------|-------------------|---------------|
| 1    | DAD 230, 16 nm    | 20.311               | 4.54122e4         | 561.84076         | 50.2022       |
| 2    | DAD 230, 16 nm    | 26.659               | 4.50464e4         | 377.79135         | 49.7978       |

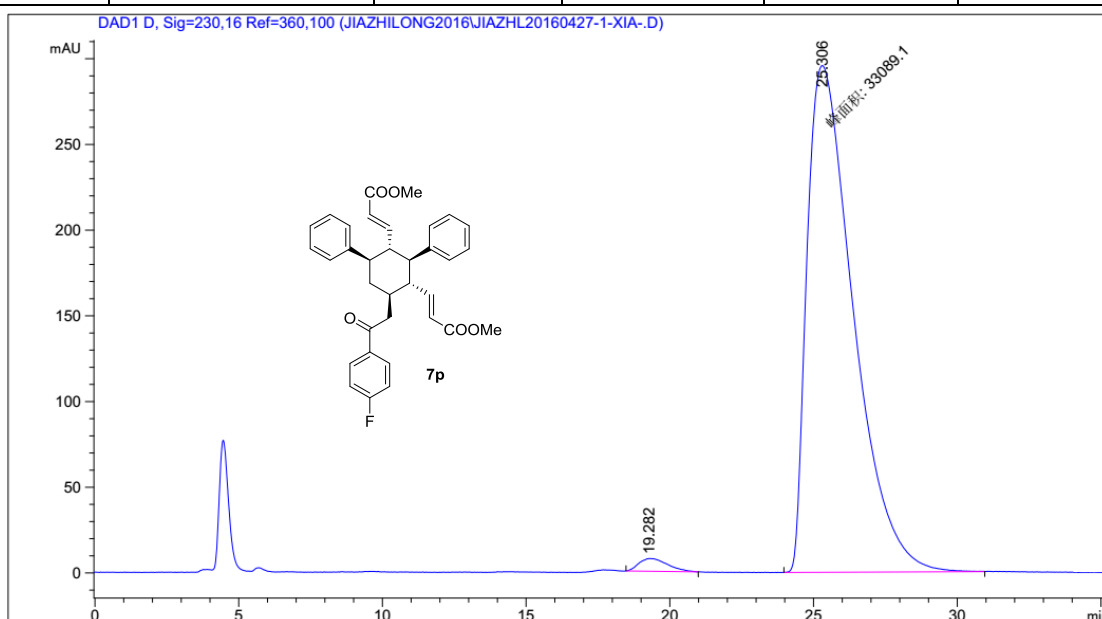

| Peak | Processed Channel | Retention Time (min) | Peak Area (mAU*s) | Peak Height (mAU) | Peak Area (%) |
|------|-------------------|----------------------|-------------------|-------------------|---------------|
| 1    | DAD 230, 16 nm    | 19.282               | 514.77063         | 7.44656           | 1.5319        |
| 2    | DAD 230, 16 nm    | 25.306               | 3.30891e4         | 295.56290         | 98.4681       |

HPLC using an AD column (hexane: *i*-PrOH = 70:30, 1.0 mL/min)

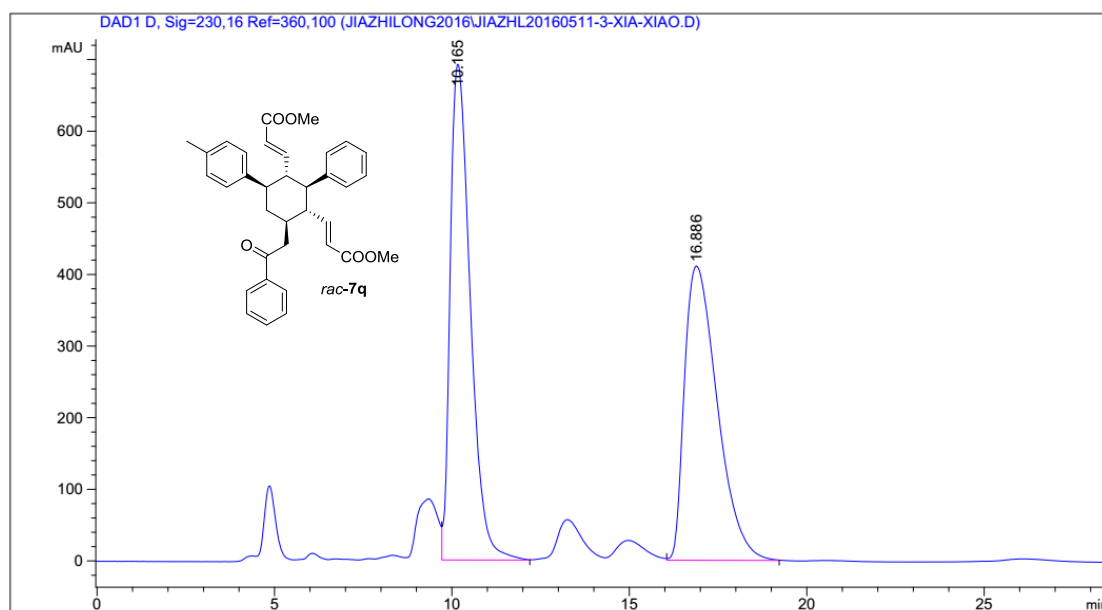

| Peak | Processed Channel | Retention Time (min) | Peak Area (mAU*s) | Peak Height (mAU) | Peak Area (%) |
|------|-------------------|----------------------|-------------------|-------------------|---------------|
| 1    | DAD 230, 16 nm    | 10.165               | 2.72442e4         | 692.17053         | 50.7811       |
| 2    | DAD 230, 16 nm    | 16.886               | 2.64061e4         | 410.92798         | 49.2189       |

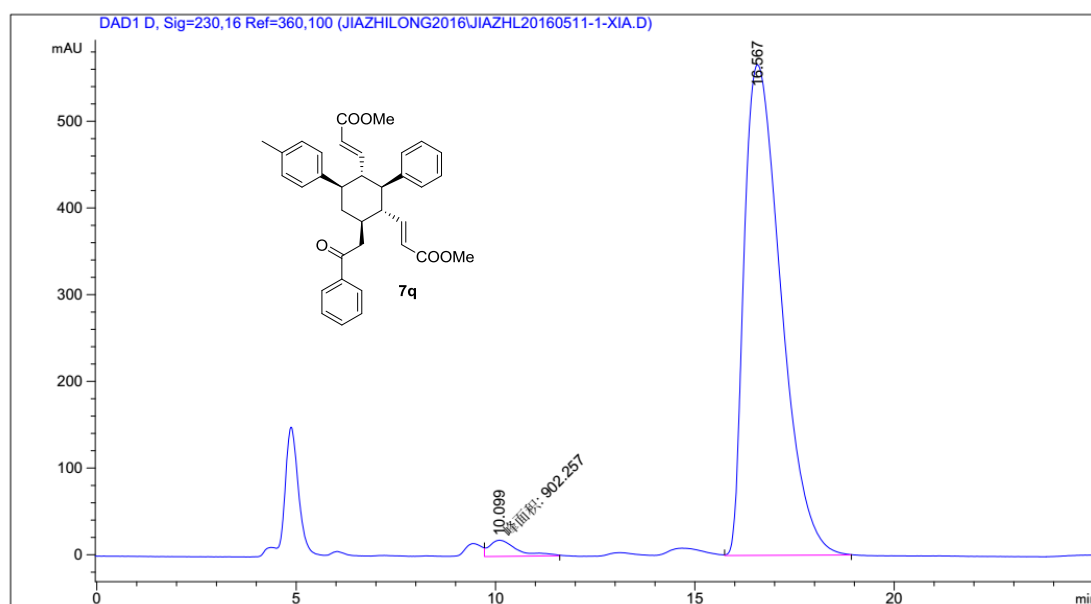

| Peak | Processed Channel | Retention Time (min) | Peak Area (mAU*s) | Peak Height (mAU) | Peak Area (%) |
|------|-------------------|----------------------|-------------------|-------------------|---------------|
| 1    | DAD 230, 16 nm    | 10.099               | 902.25653         | 18.68415          | 2.4243        |
| 2    | DAD 230, 16 nm    | 16.567               | 3.63142e4         | 566.01001         | 97.5757       |

HPLC using an AS column (hexane: *i*-PrOH = 80:20, 1.0 mL/min)

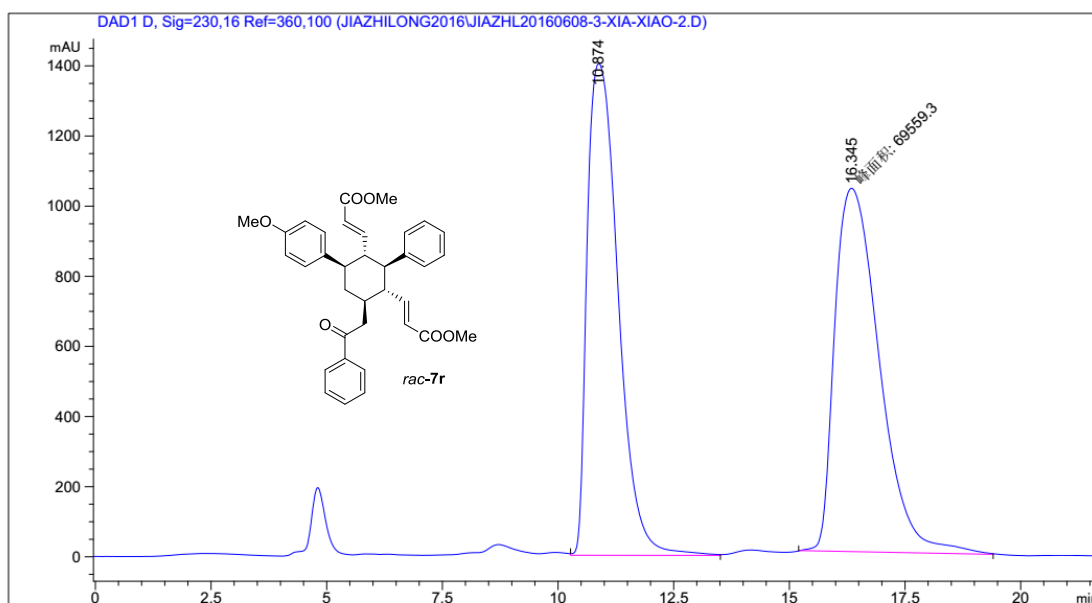

| Peak | Processed Channel | Retention Time (min) | Peak Area (mAU*s) | Peak Height (mAU) | Peak Area (%) |
|------|-------------------|----------------------|-------------------|-------------------|---------------|
| 1    | DAD 230, 16 nm    | 10.874               | 6.52911e4         | 1402.50452        | 48.4175       |
| 2    | DAD 230, 16 nm    | 16.345               | 6.95593e4         | 1036.28333        | 51.5825       |

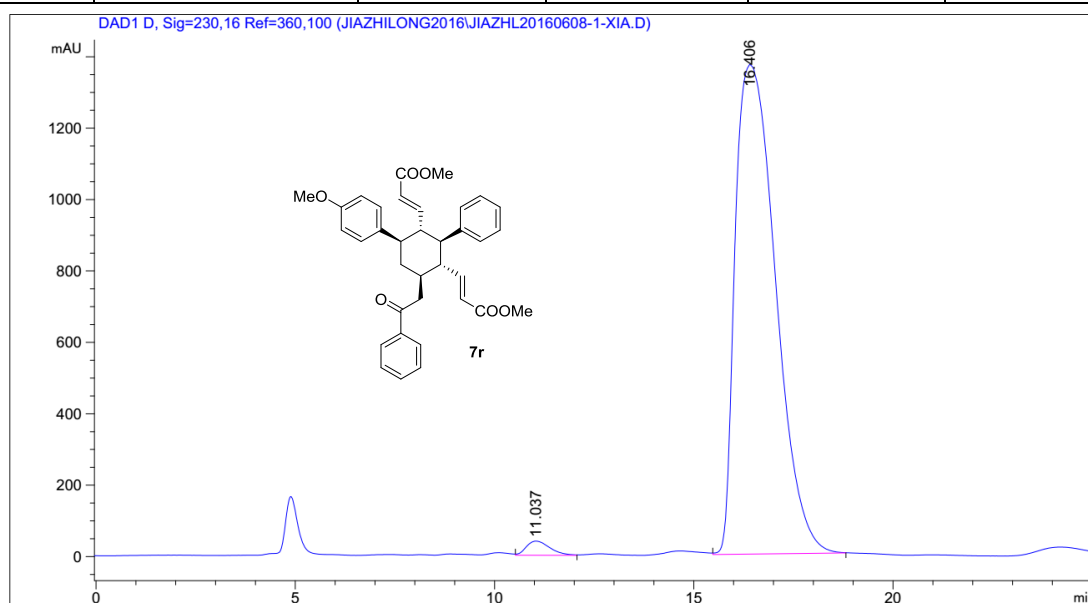

| Peak | Processed Channel | Retention Time (min) | Peak Area (mAU*s) | Peak Height (mAU) | Peak Area (%) |
|------|-------------------|----------------------|-------------------|-------------------|---------------|
| 1    | DAD 230, 16 nm    | 11.037               | 1634.63721        | 39.68741          | 1.6658        |
| 2    | DAD 230, 16 nm    | 16.406               | 9.64933e4         | 1371.35571        | 98.3342       |



HPLC using an AD column (hexane: *i*-PrOH = 70:30, 1.0 mL/min)

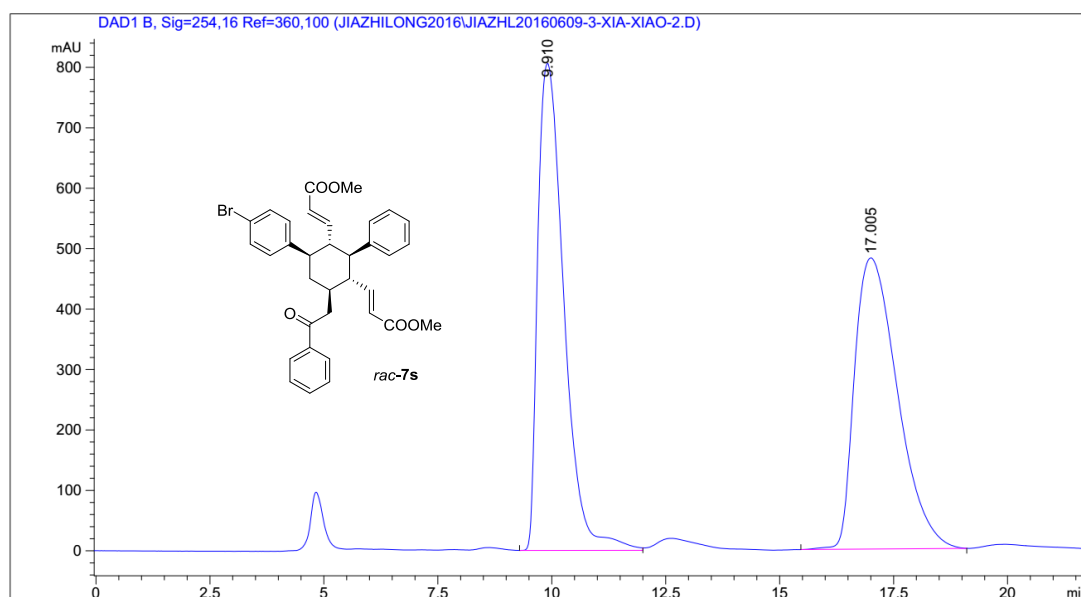

| Peak | Processed Channel | Retention Time (min) | Peak Area (mAU*s) | Peak Height (mAU) | Peak Area (%) |
|------|-------------------|----------------------|-------------------|-------------------|---------------|
| 1    | DAD 254, 16 nm    | 9.910                | 3.20494e4         | 805.71521         | 50.4087       |
| 2    | DAD 254, 16 nm    | 17.005               | 3.15297e4         | 481.81137         | 49.5913       |

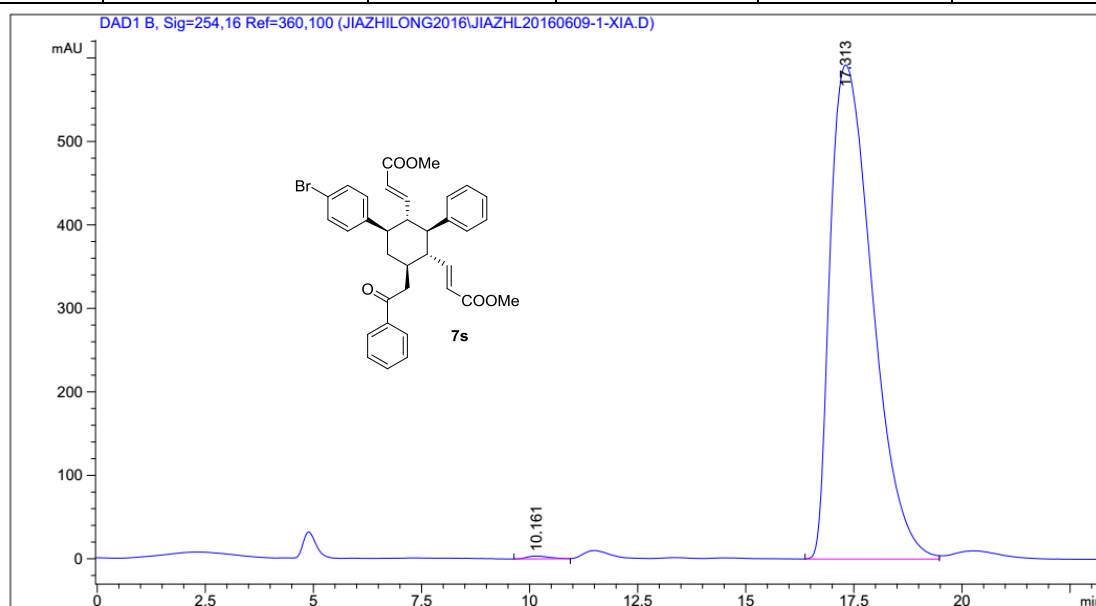

| Peak | Processed Channel | Retention Time (min) | Peak Area (mAU*s) | Peak Height (mAU) | Peak Area (%) |
|------|-------------------|----------------------|-------------------|-------------------|---------------|
| 1    | DAD 254, 16 nm    | 10.161               | 119.51803         | 3.27890           | 0.2969        |
| 2    | DAD 254, 16 nm    | 17.313               | 4.01373e4         | 591.93286         | 99.7031       |

HPLC using an AD column (hexane: *i*-PrOH = 80:20, 1.0 mL/min)

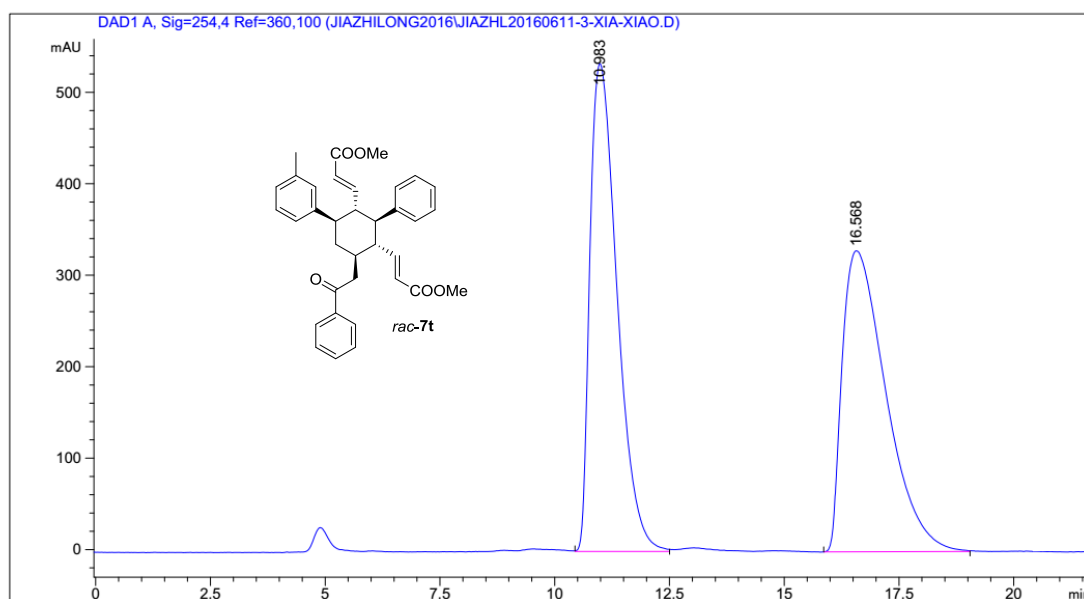

| Peak | Processed Channel | Retention Time (min) | Peak Area (mAU*s) | Peak Height (mAU) | Peak Area (%) |
|------|-------------------|----------------------|-------------------|-------------------|---------------|
| 1    | DAD 254, 4 nm     | 10.983               | 2.19026e4         | 533.39642         | 50.1786       |
| 2    | DAD 254, 4 nm     | 16.568               | 2.17468e4         | 329.08218         | 49.8214       |

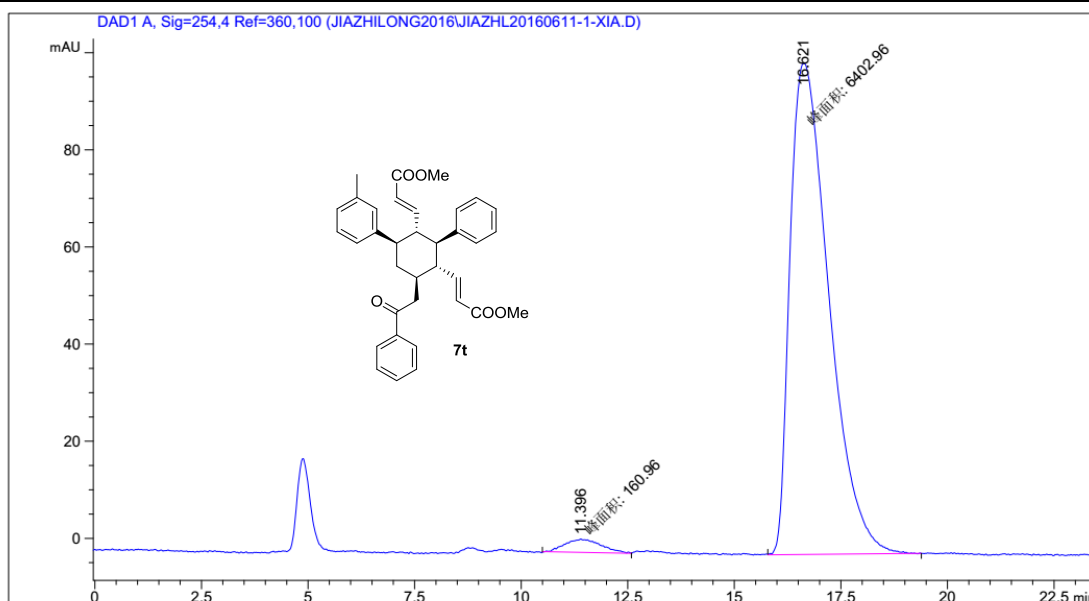

| Peak | Processed Channel | Retention Time (min) | Peak Area (mAU*s) | Peak Height (mAU) | Peak Area (%) |
|------|-------------------|----------------------|-------------------|-------------------|---------------|
| 1    | DAD 254, 4 nm     | 11.396               | 160.96036         | 2.74149           | 2.4522        |
| 2    | DAD 254, 4 nm     | 16.621               | 6402.95947        | 101.07990         | 97.5478       |
